# Supplementary material for: New class of RSO2-NHC ligands and Pd/RSO2-NHC complexes with tailored electronic properties and high performance in catalytic C–C and C–N bonds formation
Source: Royal Society of Chemistry journal article supplement (doi:10.1039/d3dt02296j), 2023-01-01
Supplement: d3dt02296j1.pdf [file d3dt02296j1.pdf]

## **New class of RSO<sub>2</sub>-NHC ligands and Pd/RSO<sub>2</sub>-NHC complexes with tailored electronic properties and high performance in catalytic C-C and C-N bonds formation**

Dmitry V. Pasyukov,<sup>a</sup> Maxim A. Shevchenko,<sup>a</sup> Alexander V. Astakhov,<sup>a</sup> Mikhail E. Minyaev,<sup>b</sup> Yu Zhang,<sup>c</sup> Victor M. Chernyshev\*<sup>a</sup>, Valentine P. Ananikov\*<sup>a,b</sup>

<sup>a</sup> *Platov South-Russian State Polytechnic University (NPI), Prosveschenya 132, 346428 Novocherkassk, Russian Federation*

<sup>b</sup> *Zelinsky Institute of Organic Chemistry, Russian Academy of Sciences, Leninsky Prospekt 47, Moscow, 119991, Russia.*

<sup>c</sup> *Guangzhou Institute of Energy Conversion, Chinese Academy of Sciences, No. 2, Nengyuan Road, Wushan Street, Guangzhou, 510640, China*  
*E-mail: [chern13@yandex.ru](mailto:chern13@yandex.ru), [val@ioc.ac.ru](mailto:val@ioc.ac.ru)*

### **Table of contents:**

|                                                       |     |
|-------------------------------------------------------|-----|
| S1. General information and materials .....           | S2  |
| S2. Extended DFT data .....                           | S4  |
| S3. Single Crystal X-Ray Diffraction Data .....       | S7  |
| S4. <sup>1</sup> H, <sup>13</sup> C NMR spectra ..... | S13 |
| S5. Cartesian coordinates .....                       | S48 |
| S6. Literature references .....                       | S60 |

## S1. General information and materials

**General Procedures.** Solvents were purified and dried according to standard methods and stored over activated 3 Å molecular sieves prior to use. Column chromatography was conducted on silica gel 60 (230–400 mesh, Merck). Glassware was dried at 120 °C in an oven for at least 3 h before use.

**Instrumentation.**  $^1\text{H}$  and  $^{13}\text{C}\{^1\text{H}\}$  NMR spectra were recorded on a Bruker Avance NEO 300 spectrometer at 300 MHz for  $^1\text{H}$  and 75 MHz for  $^{13}\text{C}$  in  $\text{DMSO-}d_6$  or  $\text{CDCl}_3$ . The  $^1\text{H}$  and  $^{13}\text{C}$  NMR chemical shifts are reported relative to the solvent signals as internal standards:  $\delta$  2.50 ( $\text{DMSO-}d_6$ ) or 7.26 ( $\text{CDCl}_3$ ) for  $^1\text{H}$  and  $\delta$  39.5 ( $\text{DMSO-}d_6$ ) or 77.2 ( $\text{CDCl}_3$ ) for  $^{13}\text{C}$ .

High-resolution mass spectra (HRMS) were obtained on a Bruker maXis QTOF instrument (Bruker Daltonik GmbH, Bremen, Germany) equipped with an electrospray ionization (ESI) ion source. HRMS measurements were conducted in positive (+) MS ion mode (HV Capillary: 4500 V; Spray Shield: –500 V) with a scan range of  $m/z$  50 – 1500. External calibration of the mass spectrometer was performed with the use of a low-concentration tuning mix solution, Agilent. Direct syringe injection was implemented for the analyzed solutions at a  $3\ \mu\text{L}\ \text{min}^{-1}$  flow rate. In HRMS measurements, nitrogen was applied as the nebulizer gas (0.4 bar) and dry gas ( $4.0\ \text{L}\ \text{min}^{-1}$ ). The dry temperature was 250 °C. All the spectra were recorded with 1 Hz frequency and processed using Bruker Data Analysis 4.0 software.

All geometry optimizations were performed by the PBE1PBE method<sup>1, 2</sup> using the def2-SVP basis set<sup>3</sup> in the Gaussian 09<sup>4</sup> software package. For further validation of the energetics and electronic properties of the ligands and palladium complexes, single-point calculations were performed on the PBE1PBE/Def2-SVP optimized geometries using hybrid GGA DFT functional PBE1PBE employing a valence triple- $\zeta$ -type basis set Def2-TZVP<sup>5</sup>. The solvent effects ( $\text{CHCl}_3$ ,  $\epsilon = 4.71$ ) were evaluated implicitly by a self-consistent reaction field (SCRF) approach using the IEF PCM continuum solvation model<sup>6, 7</sup>. The convergence criteria were used as default, and the vibrational analysis was also carried out under standard conditions (1 atm., 298.15 K).

The percent buried volume  $\%V_{\text{bur}}$  was obtained from topographic steric maps analysis of model palladium complexes using the SambVca 2.1 web tool<sup>8</sup> (parameters: sphere radius 3.50 Å; mesh spacing 0.05; bond radii scaled by 1.17; H atoms are excluded). The ETS-NOCV analysis was performed with the Multiwfn program<sup>9</sup>. The molecular structures and isosurfaces of frontier orbitals, ETS-NOCV pairs and MESP densities were visualized using Chemcraft<sup>10</sup> software.

**Materials.** Compounds **1a-r** were synthesized as described in the literature.<sup>11</sup> All other chemicals were purchased from commercial sources.

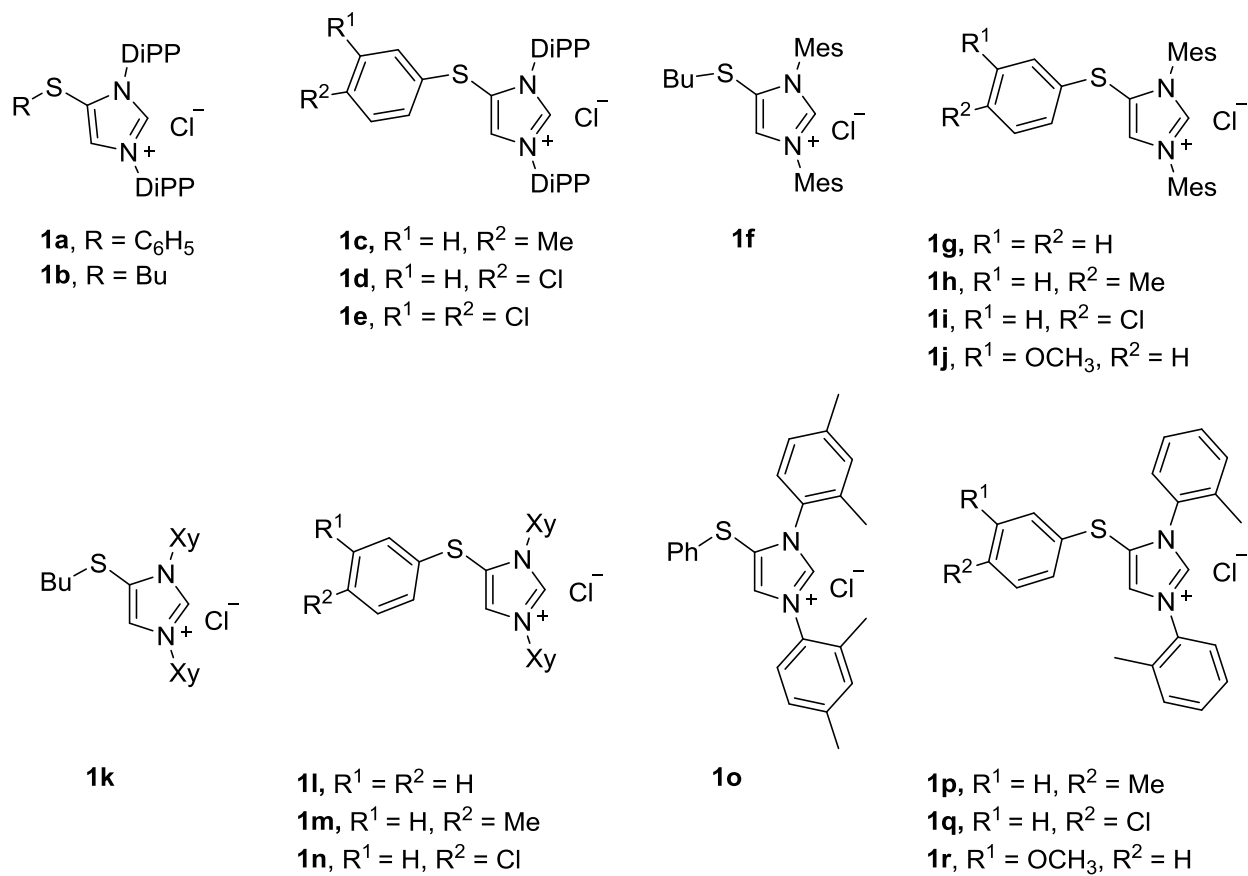

**Figure S1.** Structures of starting compounds **1a-r**.

## S2. Extended DFT data

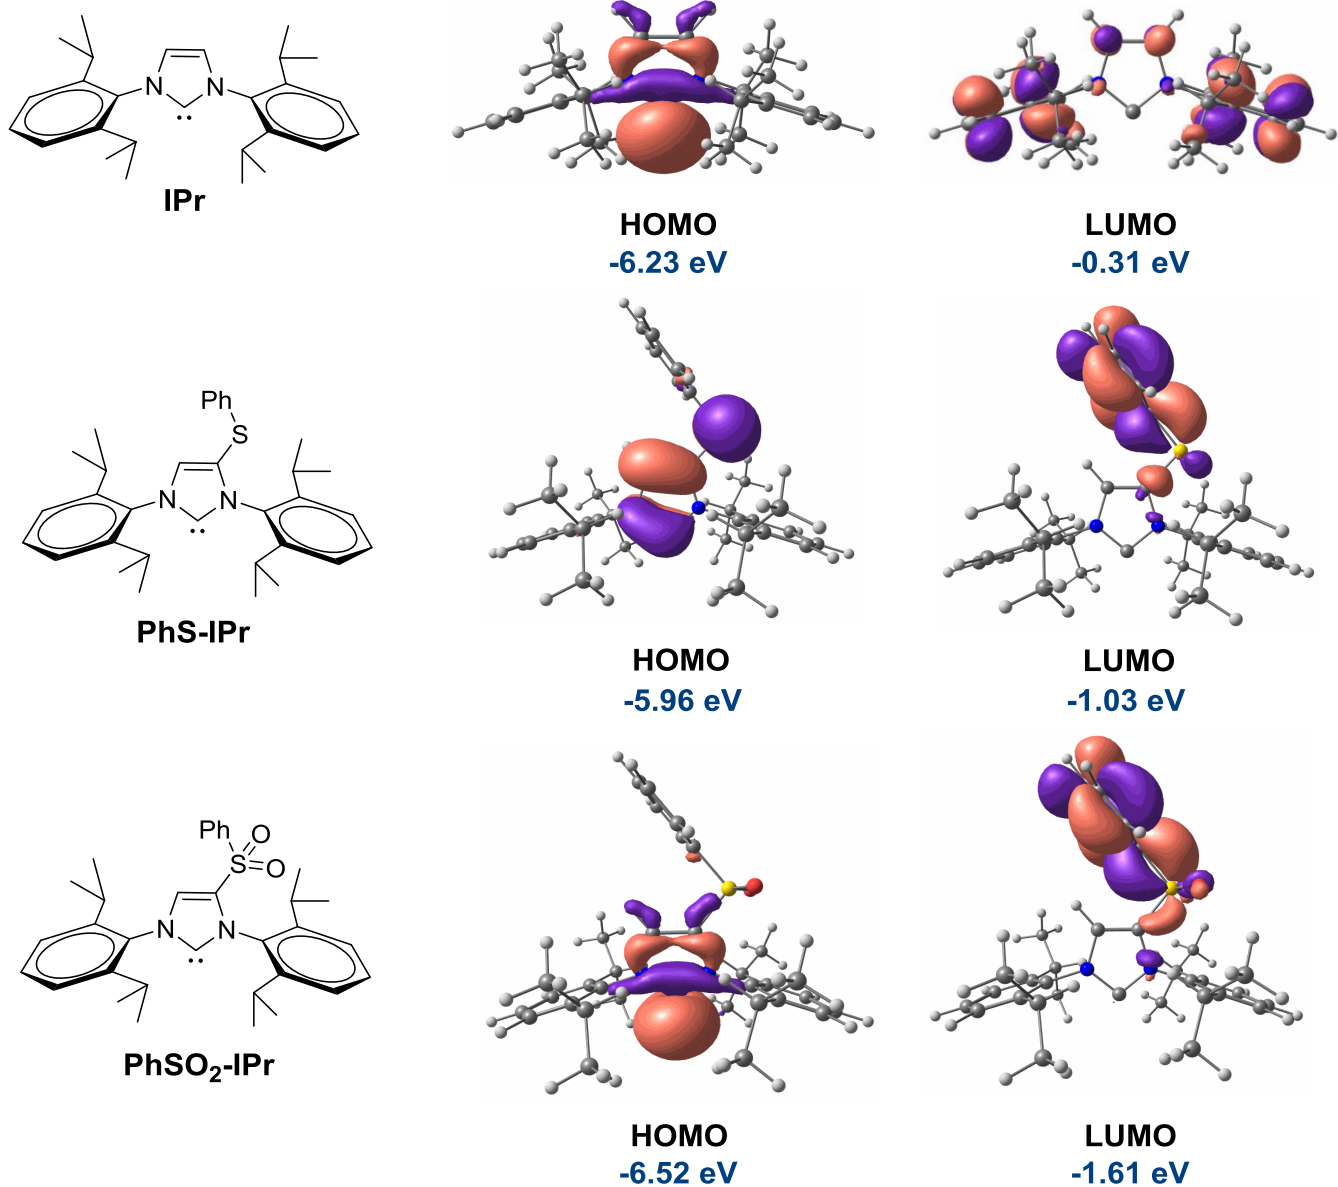

**Figure S2.** Plots and energy values (in eV) of the HOMO and LUMO calculated at PBE1PBE/def2tzvp//PBE1PBE/def2svp in CHCl<sub>3</sub> solution (IEF-PCM).

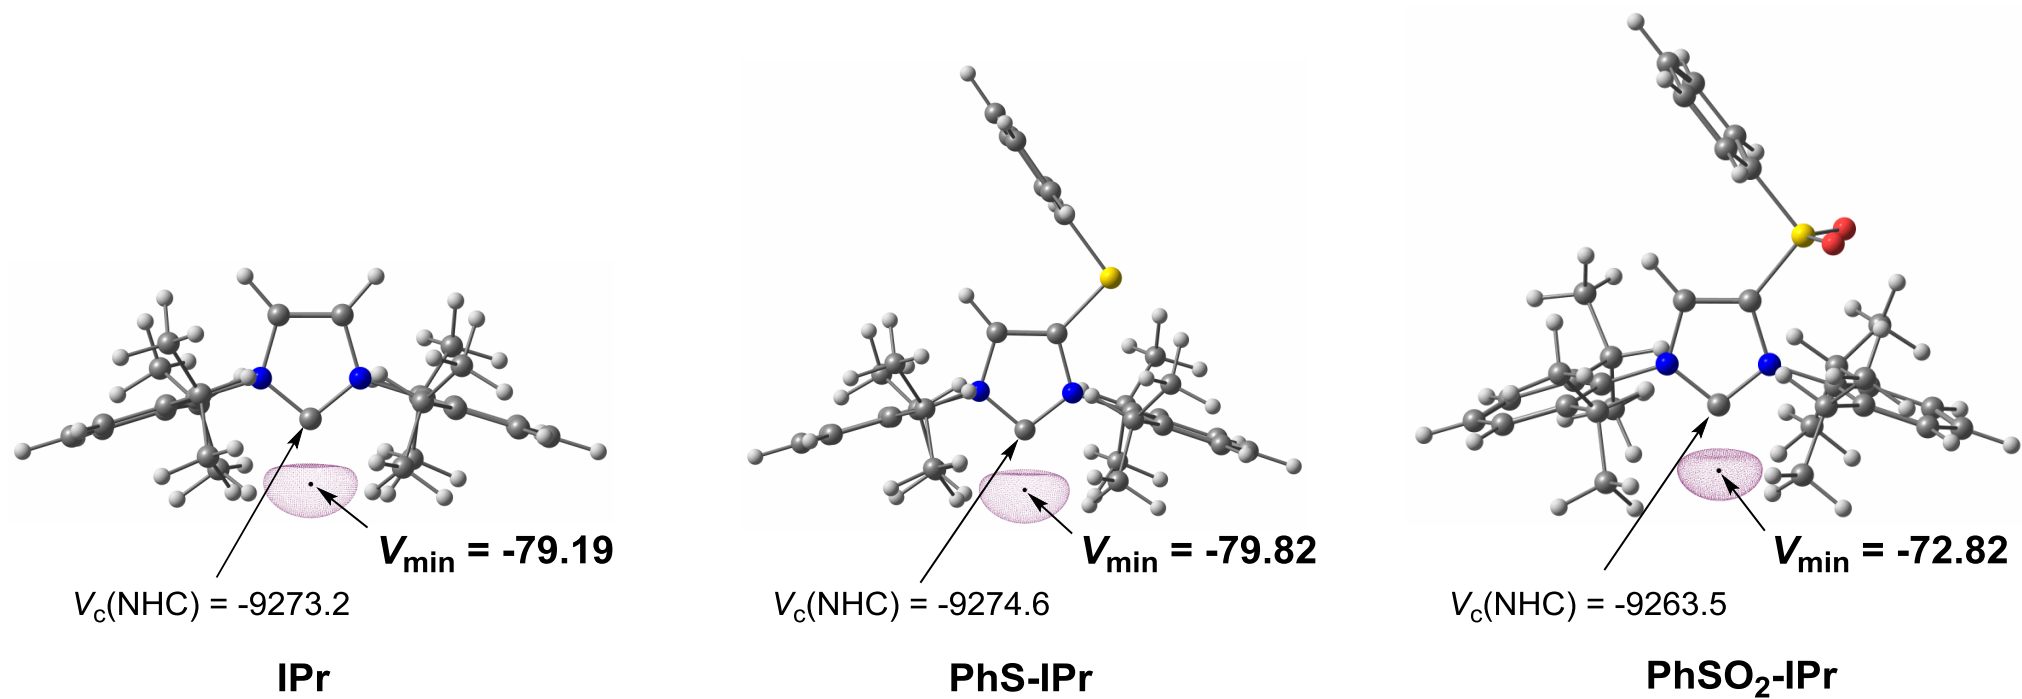

**Figure S3.** Molecular electrostatic potential isosurface at  $-50 \text{ kcal}\cdot\text{mol}^{-1}$  of model NHC-ligands calculated at PBE1PBE/def2tzvp//PBE1PBE/def2svp in  $\text{CHCl}_3$  solution (IEF-PCM). The black dots represent the location of the  $V_{\min}$  points.  $V_{\min}$  and  $V_c$  values are given in  $\text{kcal}\cdot\text{mol}^{-1}$ .

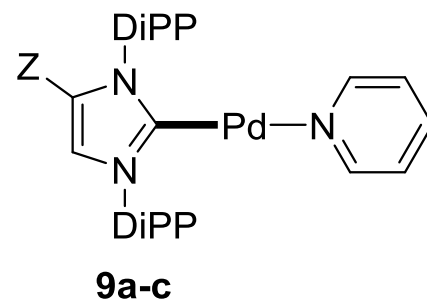

| Complex                            | BDE, kcal/mol |
|------------------------------------|---------------|
| <b>9a</b> , Z = H                  | 53.9          |
| <b>9b</b> , Z = SPh                | 53.9          |
| <b>9c</b> , Z = SO <sub>2</sub> Ph | 53.6          |

**Figure S4.** Pd-C<sub>(NHC)</sub> bond dissociation energy (BDE) calculated at PBE1PBE/def2tzvp//PBE1PBE/def2svp in molecules **9a-c**.

### S3. Single crystal X-ray diffraction data

X-ray diffraction data for (IPr)PdSPh and **3a** were collected at 100 K on a four-circle Rigaku Synergy S diffractometer equipped with a HyPix6000HE area detector (kappa geometry, shutterless  $\omega$ -scan technique) using monochromatized Mo  $K_{\alpha}$ -radiation. The intensity data were integrated and analytically corrected for absorption and decay by the CrysAlisPro program.<sup>12</sup> The structures were solved by direct methods using SHELXT<sup>13</sup> and refined by the full-matrix least-squares method on  $F^2$  using SHELXL-2018<sup>14</sup> in the OLEX2 program.<sup>15</sup> All non-hydrogen atoms were refined with individual anisotropic displacement parameters. All hydrogen atoms were placed in ideal calculated positions (C-H distance = 0.950 Å for aromatic, 0.980 Å for methyl, 0.990 Å for methylene and 1.000 Å for tertiary hydrogen atoms) and refined as riding atoms with relative isotropic displacement parameters taken as  $U_{\text{iso}}(\text{H})=1.5U_{\text{eq}}(\text{C})$  for methyl groups and  $U_{\text{iso}}(\text{H})=1.2U_{\text{eq}}(\text{C})$  otherwise. The disordered fragments and molecules were modeled by applying similarity constraints on anisotropic displacement parameters on similar atoms and by constraining similar distances to be equal within the deviation of 0.003 Å.

Crystal data, data collection and structure refinement details for **3a** are summarized in Table S1. The structures have been deposited at the Cambridge Crystallographic Data Center with the reference CCDC numbers 2255010; they also contain the supplementary crystallographic data. These data can be obtained free of charge from the CCDC via <https://www.ccdc.cam.ac.uk/structures/>

**Table S1.** Crystal data, data collection and structure refinement details for **3a**

|                                                                         |                                                                                   |
|-------------------------------------------------------------------------|-----------------------------------------------------------------------------------|
| Identification code                                                     | <b>3a</b>                                                                         |
| Empirical formula                                                       | C <sub>39</sub> H <sub>47</sub> Cl <sub>4</sub> N <sub>3</sub> O <sub>2</sub> PdS |
| Formula weight                                                          | 870.05                                                                            |
| Temperature, K                                                          | 100.0(2)                                                                          |
| Wavelength, Å                                                           | 0.71073                                                                           |
| Crystal system                                                          | Monoclinic                                                                        |
| Space group                                                             | P2 <sub>1</sub> /c                                                                |
| Unit cell dimensions                                                    |                                                                                   |
| a, Å                                                                    | 11.69119(14)                                                                      |
| b, Å                                                                    | 19.42369(17)                                                                      |
| c, Å                                                                    | 18.9969(2)                                                                        |
| β, °                                                                    | 107.4290(13)                                                                      |
| Volume, Å <sup>3</sup>                                                  | 4115.87(8) Å <sup>3</sup>                                                         |
| Z                                                                       | 4                                                                                 |
| Density (calculated), g/cm <sup>3</sup>                                 | 1.404                                                                             |
| Absorption coefficient (μ), mm <sup>-1</sup>                            | 0.797                                                                             |
| F(000)                                                                  | 1792                                                                              |
| Crystal size, mm                                                        | 0.75×0.60×0.48                                                                    |
| θ range for data collection, °                                          | 2.105-33.750                                                                      |
| Index ranges                                                            | -18 ≤ h ≤ 18,<br>-29 ≤ k ≤ 30,<br>-29 ≤ l ≤ 29                                    |
| Reflections                                                             |                                                                                   |
| Collected                                                               | 97310                                                                             |
| Independent [R <sub>int</sub> ]                                         | 16385 [0.0246]                                                                    |
| Observed (I>2σ(I))                                                      | 15026                                                                             |
| Completeness to θ <sub>full</sub> / θ <sub>max</sub>                    | 0.999 / 0.994                                                                     |
| T <sub>max</sub> / T <sub>min</sub>                                     | 0.745 / 0.652                                                                     |
| Data / restraints / parameters                                          | 16385 / 1013 / 774                                                                |
| Goodness-of-fit on F <sup>2</sup>                                       | 1.075                                                                             |
| R1/wR2 (I>2σ(I))                                                        | 0.0286 / 0.0691                                                                   |
| R1/wR2 (all data)                                                       | 0.0323 / 0.0704                                                                   |
| Extinction coefficient                                                  | 0.00084(9)                                                                        |
| Δρ <sub>min</sub> / Δρ <sub>max</sub> , e <sup>-</sup> ·Å <sup>-3</sup> | 1.219 / -0.509                                                                    |
| CCDC number                                                             | 2255010                                                                           |



The structure of **3a**.

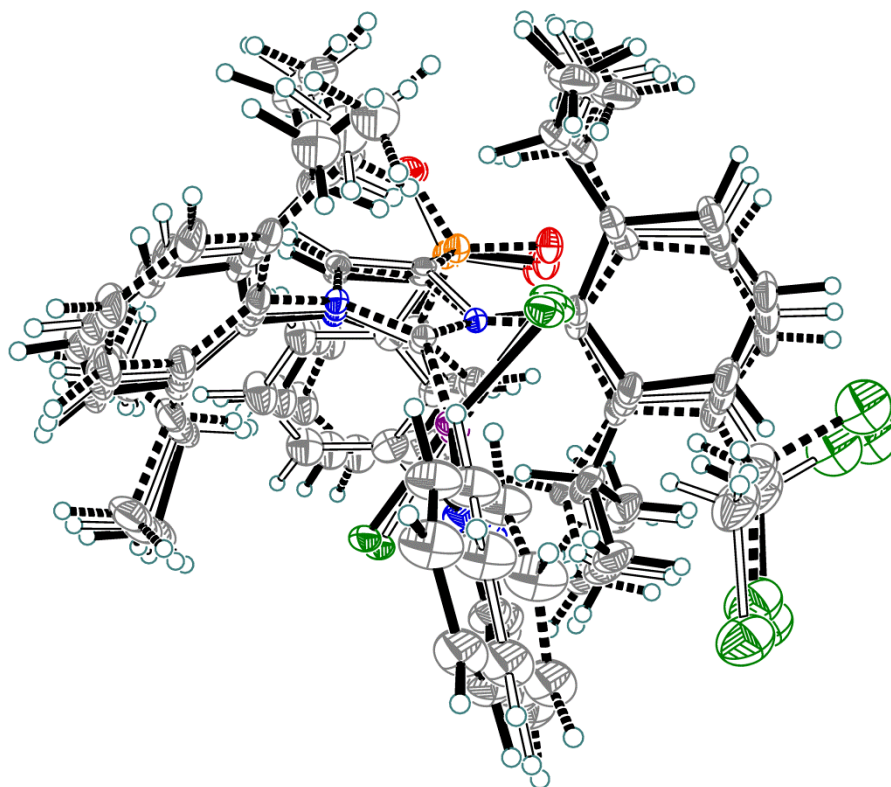

**Figure S5.** The structure of **3a** ( $p=50\%$ ). The molecule of the complex was modeled as disordered over three positions (the disorder ratio is 0.498(2):0.289(2):0.2132(19)). The lattice chloroform molecule is also disordered over three positions (0.845(3):0.070(2):0.085(3)).

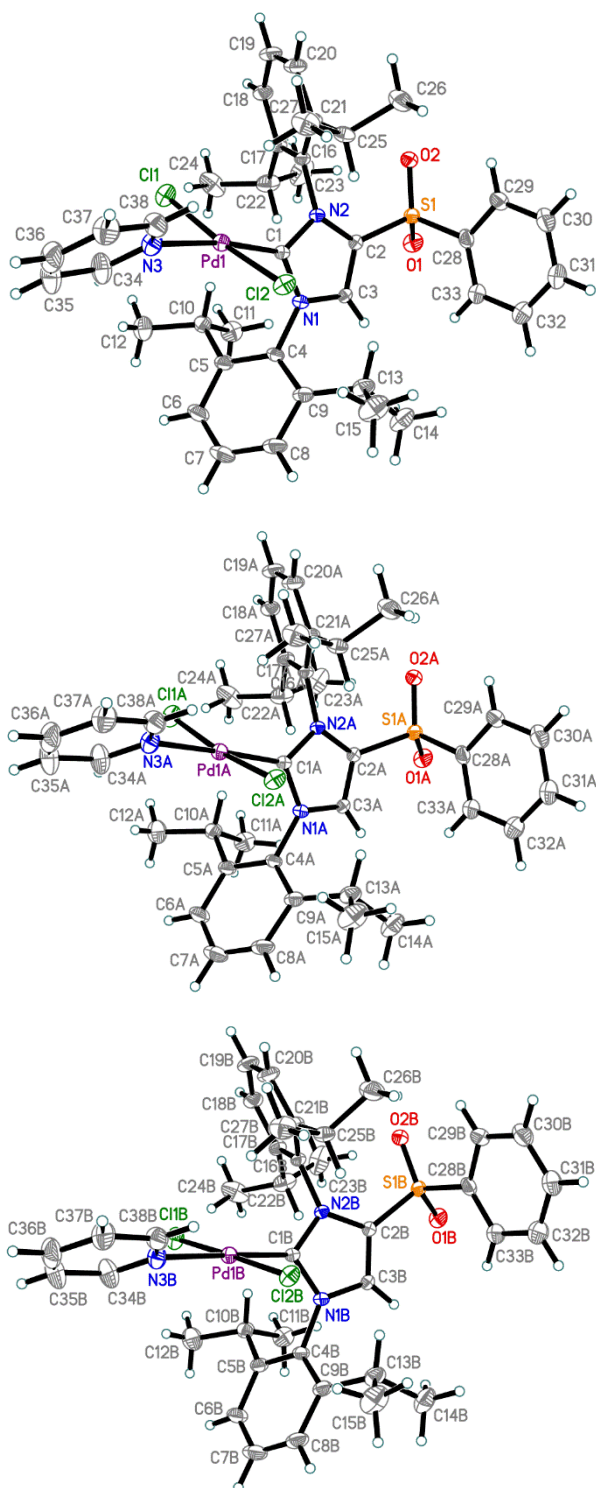

**Figure S6.** Three components for the disorder of molecule **3a** ( $p=50\%$ ) with atom site occupancies of 0.498(2) (top), 0.289(2) (middle) and 0.2132(19) (bottom).

**Table S2.** Selected bond distances in **3a**, in Å.

|           |            |           |          |           |          |
|-----------|------------|-----------|----------|-----------|----------|
| Pd1-Cl1   | 2.2975(14) | C5-C6     | 1.402(2) | C21-C25   | 1.512(2) |
| Pd1-Cl2   | 2.3032(14) | C5-C10    | 1.516(3) | C22-C23   | 1.532(2) |
| Pd1-C1    | 1.9678(17) | C6-C7     | 1.374(3) | C22-C24   | 1.530(2) |
| Pd1-N3    | 2.0974(18) | C7-C8     | 1.375(3) | C25-C26   | 1.533(2) |
| S1-O1     | 1.4415(18) | C8-C9     | 1.403(2) | C25-C27   | 1.530(2) |
| S1-O2     | 1.4323(17) | C9-C13    | 1.514(3) | C28-C29   | 1.390(2) |
| S1-C2     | 1.7591(18) | C10-C11   | 1.536(2) | C28-C33   | 1.390(2) |
| S1-C28    | 1.7664(19) | C10-C12   | 1.533(2) | C29-C30   | 1.394(3) |
| N1-C1     | 1.3647(19) | C13-C14   | 1.536(2) | C30-C31   | 1.376(3) |
| N1-C3     | 1.376(2)   | C13-C15   | 1.533(2) | C31-C32   | 1.380(3) |
| N1-C4     | 1.449(2)   | C16-C17   | 1.400(2) | C32-C33   | 1.392(2) |
| C1-N2     | 1.3582(19) | C16-C21   | 1.397(2) | N3-C34    | 1.341(2) |
| N2-C2     | 1.4016(19) | C17-C18   | 1.401(2) | N3-C38    | 1.340(2) |
| N2-C16    | 1.456(2)   | C17-C22   | 1.511(2) | C34-C35   | 1.393(3) |
| C2-C3     | 1.353(2)   | C18-C19   | 1.375(2) | C35-C36   | 1.379(3) |
| C4-C5     | 1.403(2)   | C19-C20   | 1.374(2) | C36-C37   | 1.378(3) |
| C4-C9     | 1.400(2)   | C20-C21   | 1.402(2) | C37-C38   | 1.392(2) |
| Pd1A-Cl1A | 2.298(2)   | C5A-C6A   | 1.402(3) | C21A-C25A | 1.512(3) |
| Pd1A-Cl2A | 2.304(2)   | C5A-C10A  | 1.515(3) | C22A-C23A | 1.532(2) |
| Pd1A-C1A  | 1.967(2)   | C6A-C7A   | 1.373(3) | C22A-C24A | 1.532(2) |
| Pd1A-N3A  | 2.097(2)   | C7A-C8A   | 1.372(3) | C25A-C26A | 1.532(2) |
| S1A-O1A   | 1.442(2)   | C8A-C9A   | 1.403(3) | C25A-C27A | 1.531(2) |
| S1A-O2A   | 1.432(2)   | C9A-C13A  | 1.514(3) | C28A-C29A | 1.390(3) |
| S1A-C2A   | 1.759(2)   | C10A-C11A | 1.535(2) | C28A-C33A | 1.388(3) |
| S1A-C28A  | 1.766(2)   | C10A-C12A | 1.534(2) | C29A-C30A | 1.394(3) |
| N1A-C1A   | 1.365(2)   | C13A-C14A | 1.536(2) | C30A-C31A | 1.376(3) |
| N1A-C3A   | 1.376(2)   | C13A-C15A | 1.534(2) | C31A-C32A | 1.376(3) |
| N1A-C4A   | 1.449(3)   | C16A-C17A | 1.400(2) | C32A-C33A | 1.393(3) |
| C1A-N2A   | 1.358(2)   | C16A-C21A | 1.398(2) | N3A-C34A  | 1.341(3) |
| N2A-C2A   | 1.402(2)   | C17A-C18A | 1.402(2) | N3A-C38A  | 1.341(3) |
| N2A-C16A  | 1.456(2)   | C17A-C22A | 1.513(3) | C34A-C35A | 1.392(3) |
| C2A-C3A   | 1.353(2)   | C18A-C19A | 1.375(3) | C35A-C36A | 1.379(3) |
| C4A-C5A   | 1.403(2)   | C19A-C20A | 1.373(3) | C36A-C37A | 1.379(3) |
| C4A-C9A   | 1.400(2)   | C20A-C21A | 1.403(2) | C37A-C38A | 1.392(3) |
| Pd1B-Cl1B | 2.299(2)   | C5B-C6B   | 1.402(3) | C21B-C25B | 1.510(3) |
| Pd1B-Cl2B | 2.304(2)   | C5B-C10B  | 1.512(3) | C22B-C23B | 1.532(2) |
| Pd1B-C1B  | 1.967(2)   | C6B-C7B   | 1.373(3) | C22B-C24B | 1.531(2) |
| Pd1B-N3B  | 2.096(2)   | C7B-C8B   | 1.373(3) | C25B-C26B | 1.532(2) |
| S1B-O1B   | 1.442(2)   | C8B-C9B   | 1.403(3) | C25B-C27B | 1.531(2) |
| S1B-O2B   | 1.432(2)   | C9B-C13B  | 1.514(3) | C28B-C29B | 1.389(3) |
| S1B-C2B   | 1.759(2)   | C10B-C11B | 1.535(2) | C28B-C33B | 1.388(3) |
| S1B-C28B  | 1.765(3)   | C10B-C12B | 1.534(2) | C29B-C30B | 1.393(3) |
| N1B-C1B   | 1.365(3)   | C13B-C14B | 1.536(2) | C30B-C31B | 1.377(3) |
| N1B-C3B   | 1.376(3)   | C13B-C15B | 1.536(2) | C31B-C32B | 1.376(3) |
| N1B-C4B   | 1.450(3)   | C16B-C17B | 1.399(2) | C32B-C33B | 1.393(3) |
| C1B-N2B   | 1.358(3)   | C16B-C21B | 1.398(2) | N3B-C34B  | 1.340(3) |
| N2B-C2B   | 1.401(3)   | C17B-C18B | 1.402(3) | N3B-C38B  | 1.338(3) |
| N2B-C16B  | 1.456(3)   | C17B-C22B | 1.511(3) | C34B-C35B | 1.392(3) |
| C2B-C3B   | 1.354(3)   | C18B-C19B | 1.373(3) | C35B-C36B | 1.379(3) |
| C4B-C5B   | 1.401(3)   | C19B-C20B | 1.372(3) | C36B-C37B | 1.378(3) |
| C4B-C9B   | 1.401(3)   | C20B-C21B | 1.401(3) | C37B-C38B | 1.391(3) |

**Table S3.** Selected bond angles about the Pd atom in **3a**, °.

|             |           |                |          |                |          |
|-------------|-----------|----------------|----------|----------------|----------|
| C11-Pd1-Cl2 | 174.4(4)  | C11A-Pd1A-Cl2A | 173.2(6) | C11B-Pd1B-Cl2B | 178.1(5) |
| C1-Pd1-Cl1  | 95.2(3)   | C1A-Pd1A-Cl1A  | 94.1(5)  | C1B-Pd1B-Cl1B  | 90.5(5)  |
| C1-Pd1-Cl2  | 85.2(3)   | C1A-Pd1A-Cl2A  | 86.4(4)  | C1B-Pd1B-Cl2B  | 88.3(5)  |
| C1-Pd1-N3   | 172.2(3)  | C1A-Pd1A-N3A   | 175.5(5) | C1B-Pd1B-N3B   | 178.6(4) |
| N3-Pd1-Cl1  | 89.1(2)   | N3A-Pd1A-Cl1A  | 90.4(4)  | N3B-Pd1B-Cl1B  | 89.1(3)  |
| N3-Pd1-Cl2  | 91.16(18) | N3A-Pd1A-Cl2A  | 89.2(3)  | N3B-Pd1B-Cl2B  | 92.1(3)  |

## **S4. $^1\text{H}$ and $^{13}\text{C}$ NMR spectra**

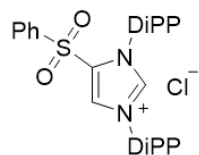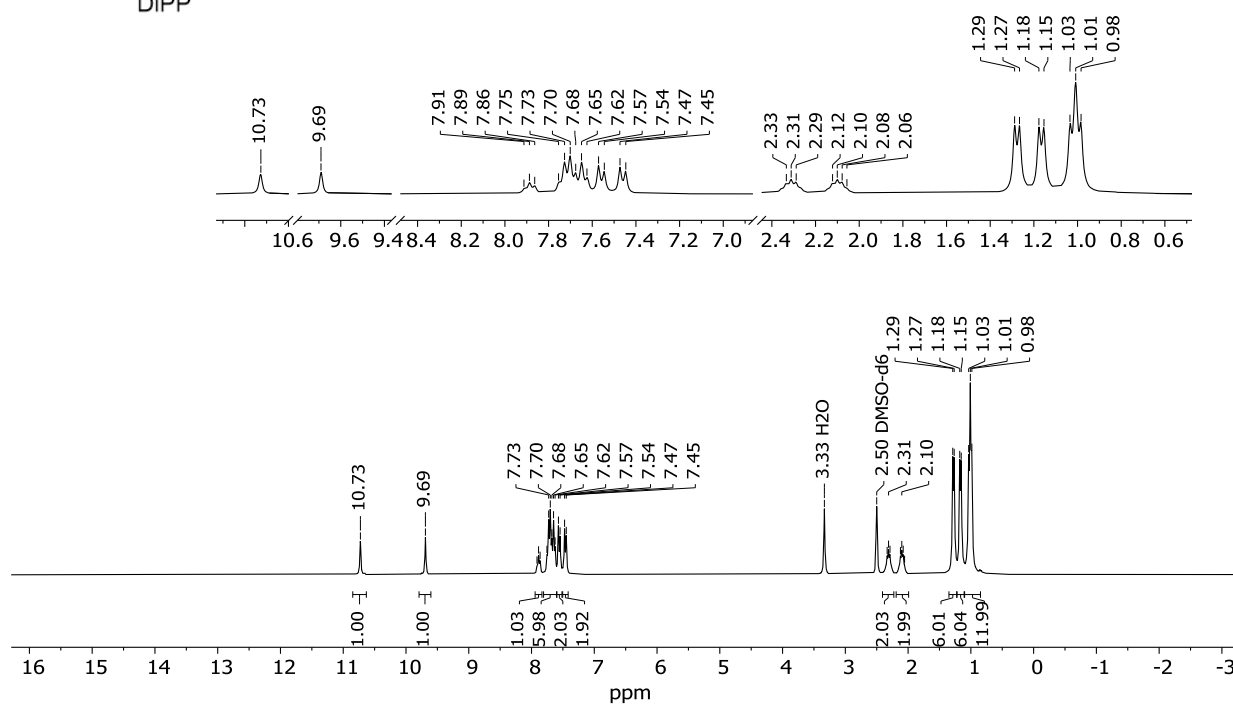

**Figure S7.  $^1\text{H}$  NMR spectrum of **2a** (DMSO- $d_6$ , 300 MHz)**

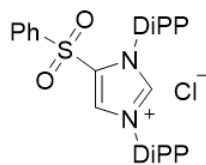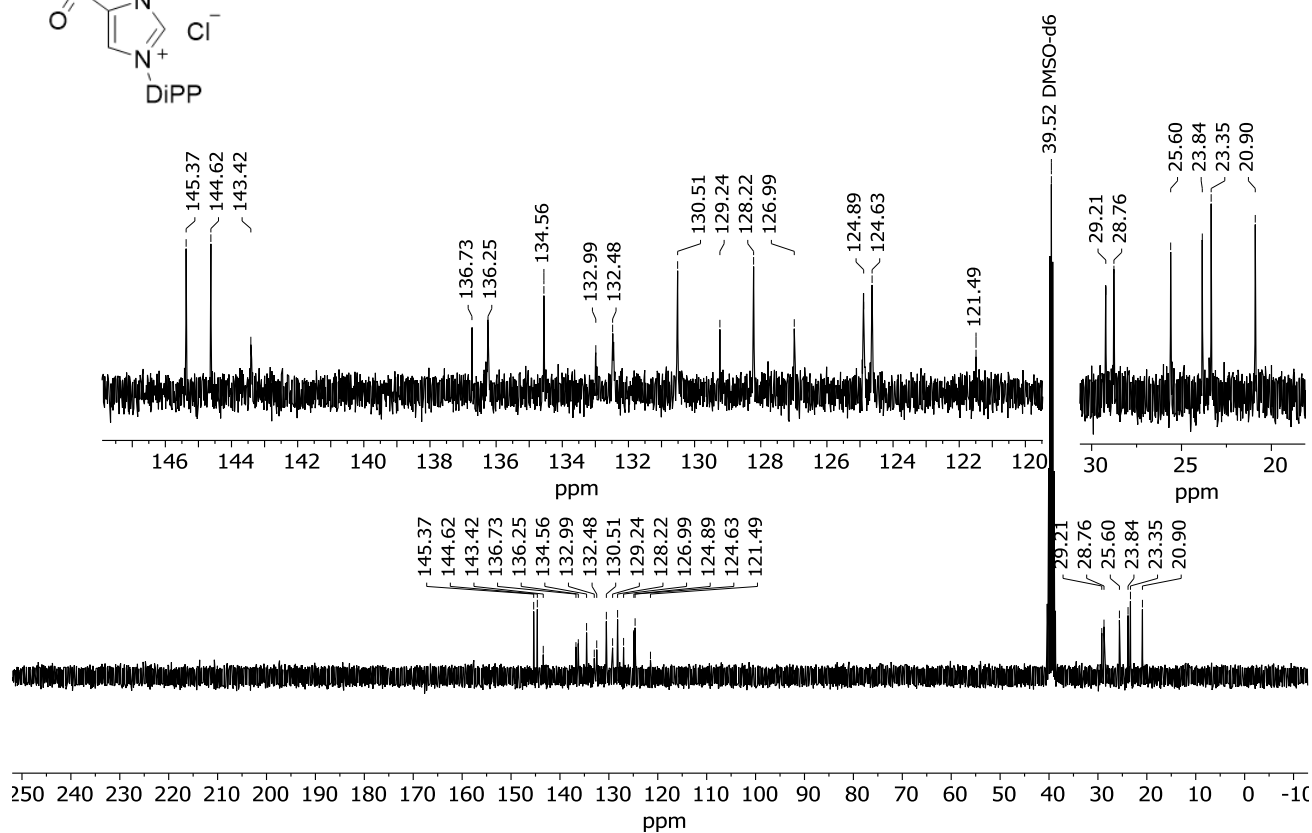

**Figure S8.  $^{13}\text{C}$  NMR spectrum of **2a** (DMSO- $d_6$ , 75 MHz)**

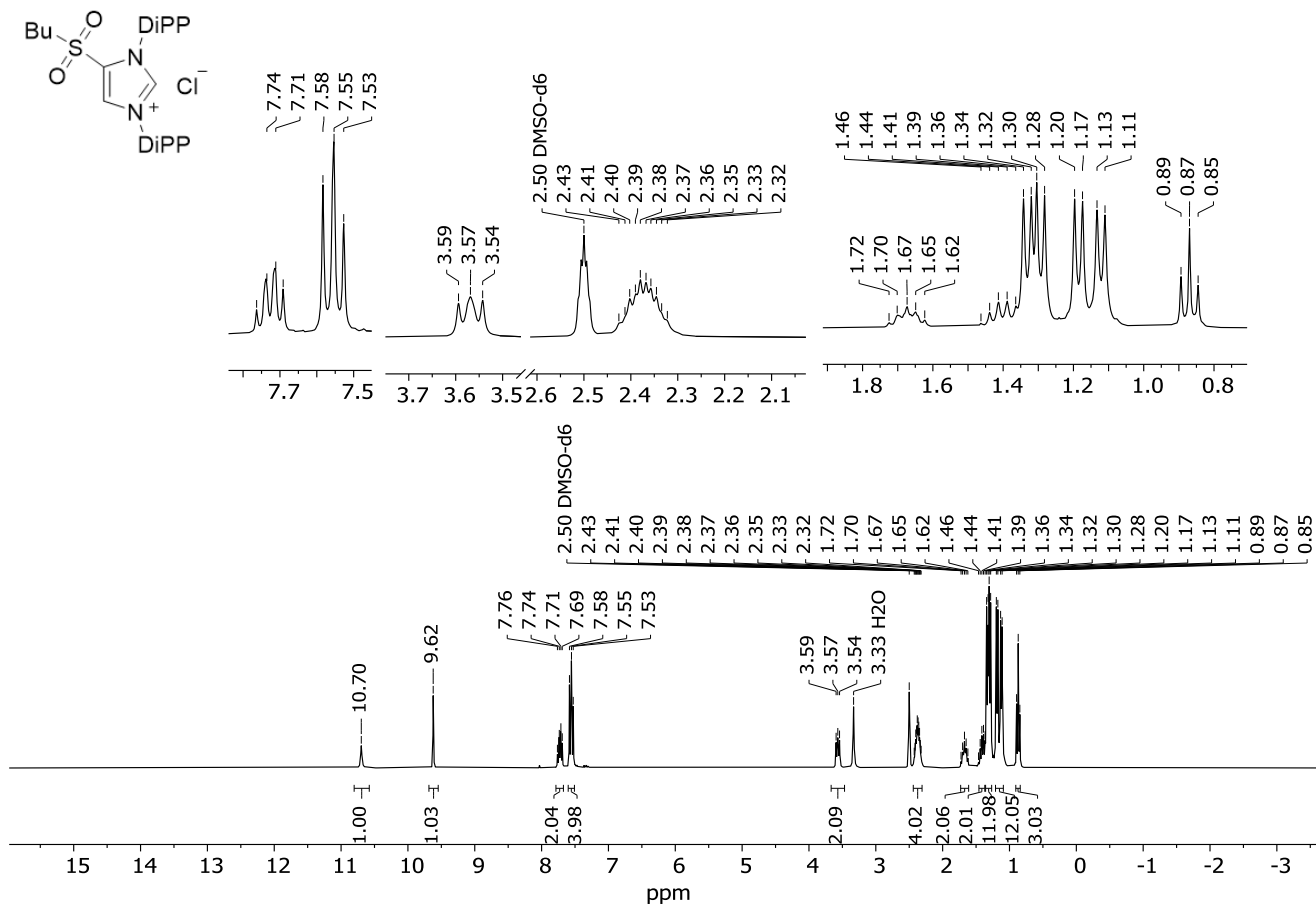

**Figure S1.**  $^1\text{H}$  NMR spectrum of **2b** (DMSO- $d_6$ , 300 MHz)

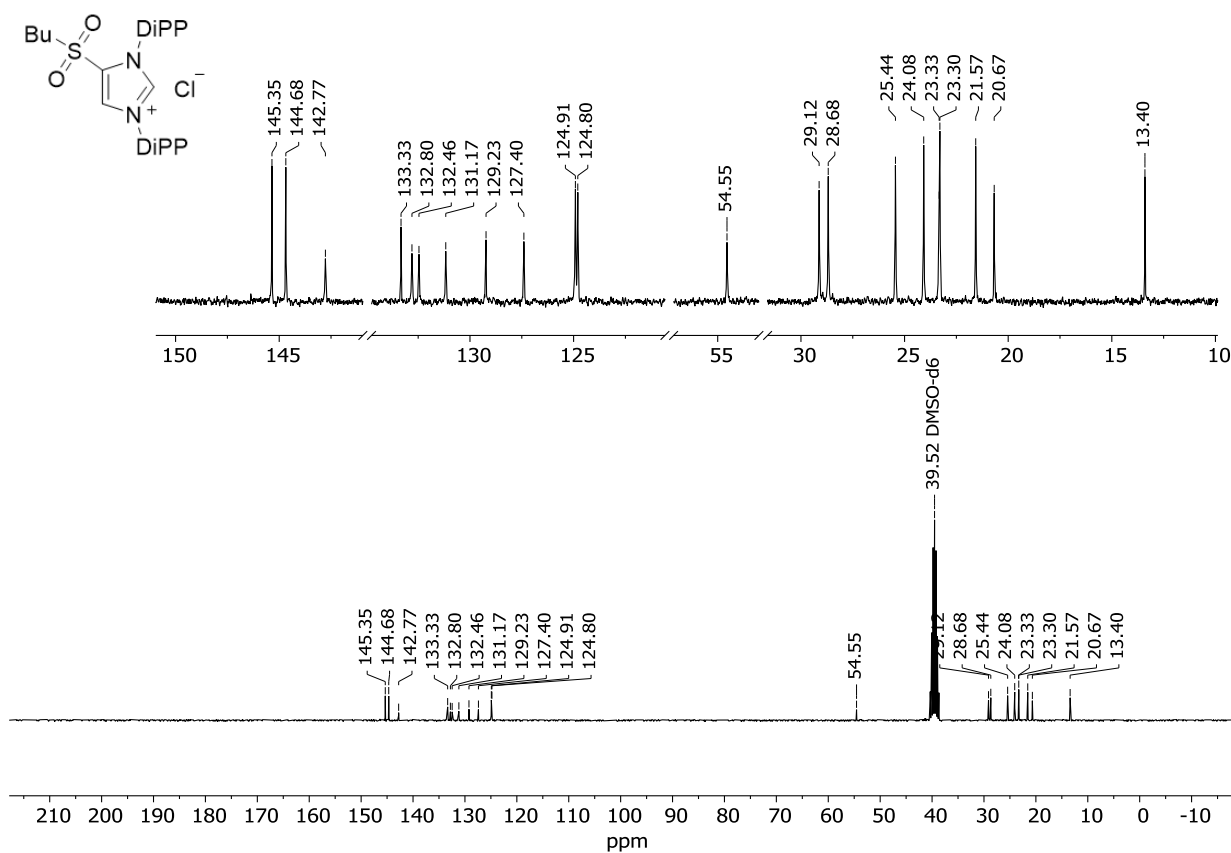

**Figure S2.**  $^{13}\text{C}$  NMR spectrum of **2b** (DMSO- $d_6$ , 75 MHz)

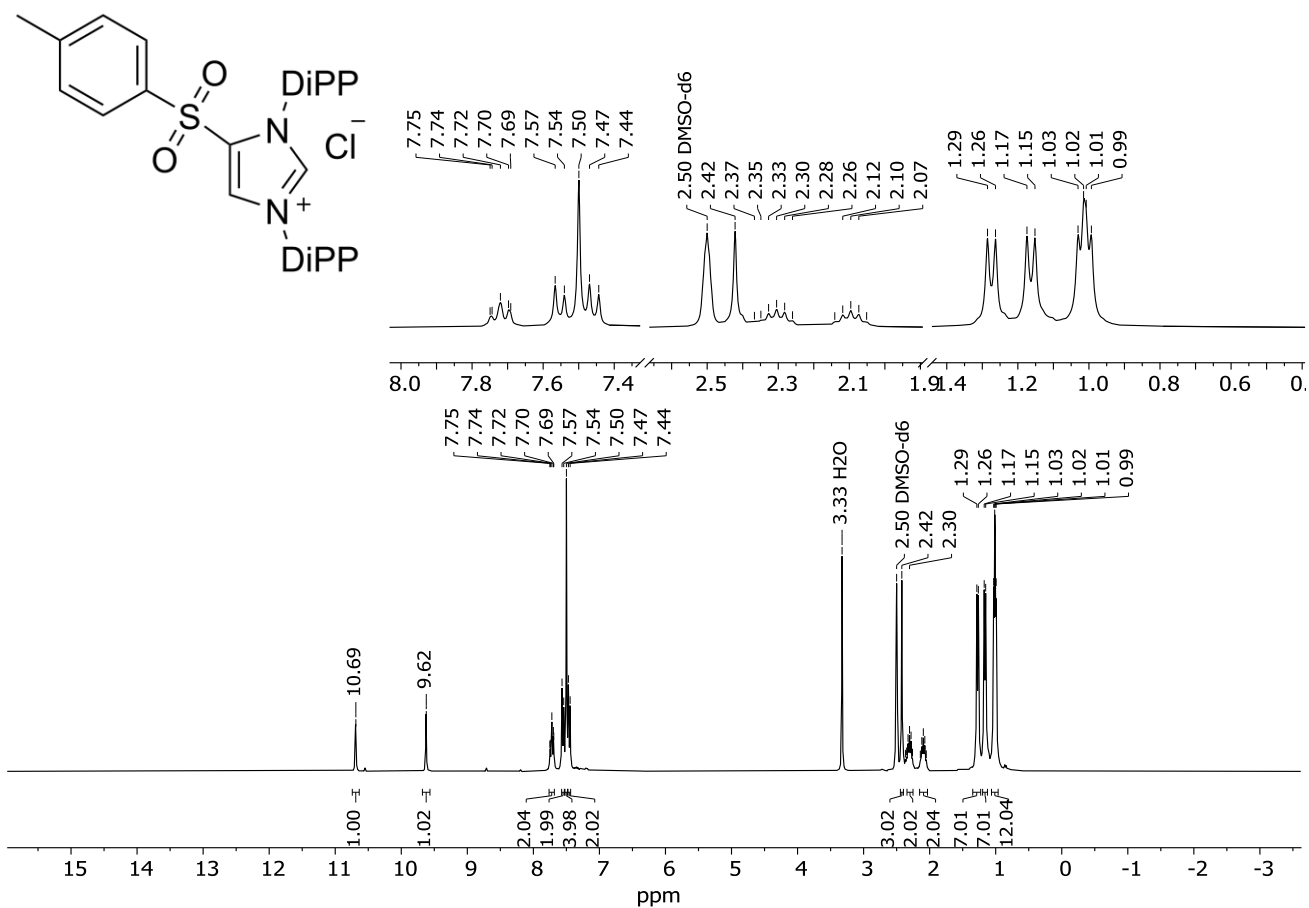

**Figure S3.**  $^1\text{H}$  NMR spectrum of **2c** (DMSO- $d_6$ , 300 MHz)

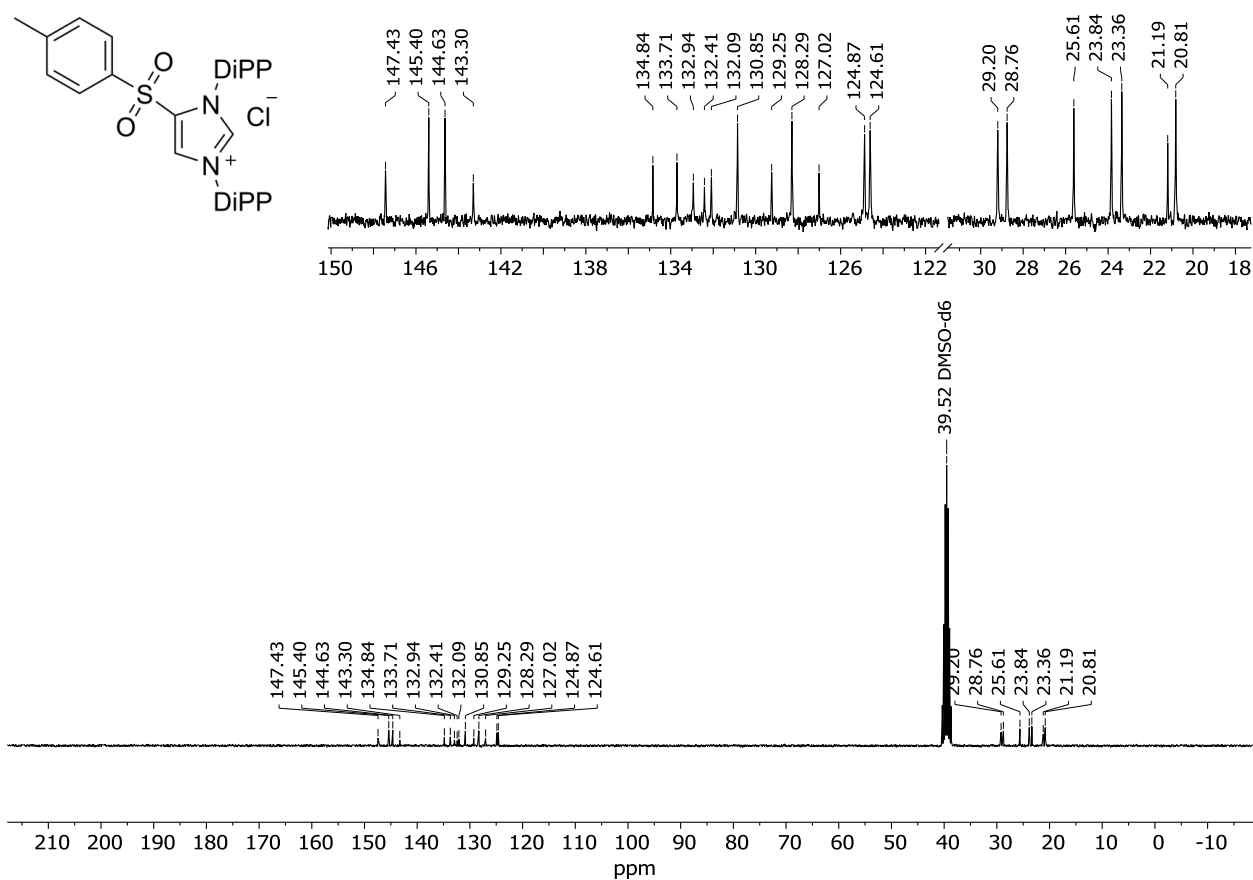

**Figure S4.**  $^{13}\text{C}$  NMR spectrum of **2c** (DMSO- $d_6$ , 75 MHz)



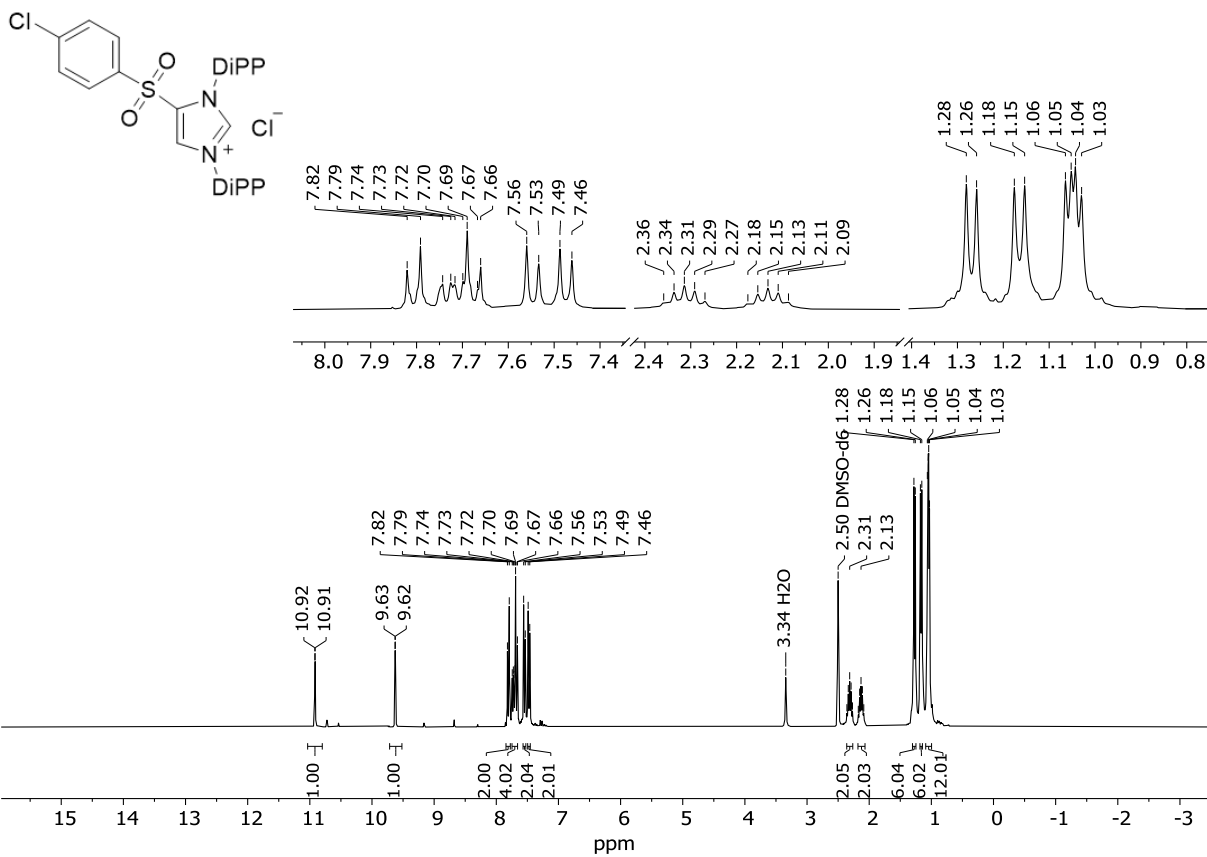

**Figure S5.**  $^1\text{H}$  NMR spectrum of **2d** (DMSO- $d_6$ , 300 MHz)

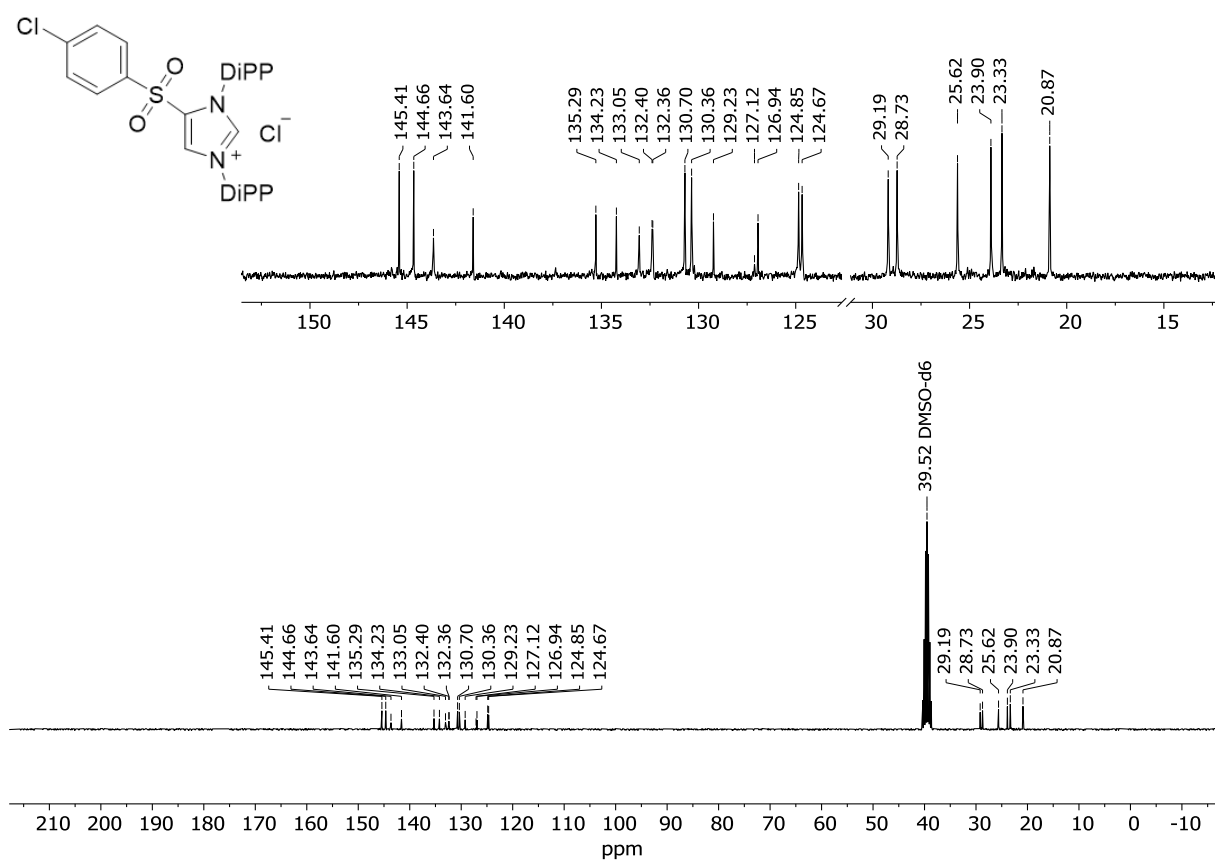

**Figure S6.**  $^{13}\text{C}$  NMR spectrum of **2d** (DMSO- $d_6$ , 75 MHz)

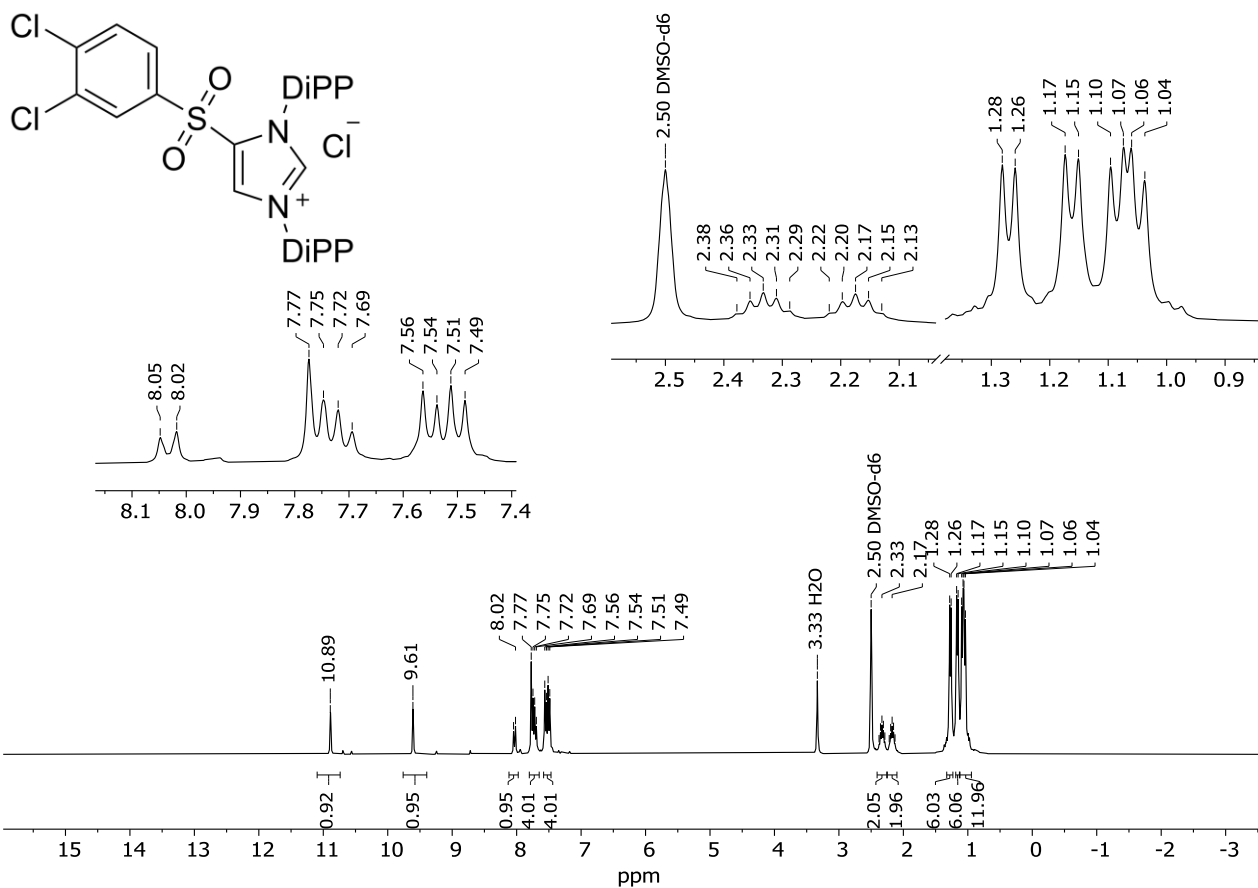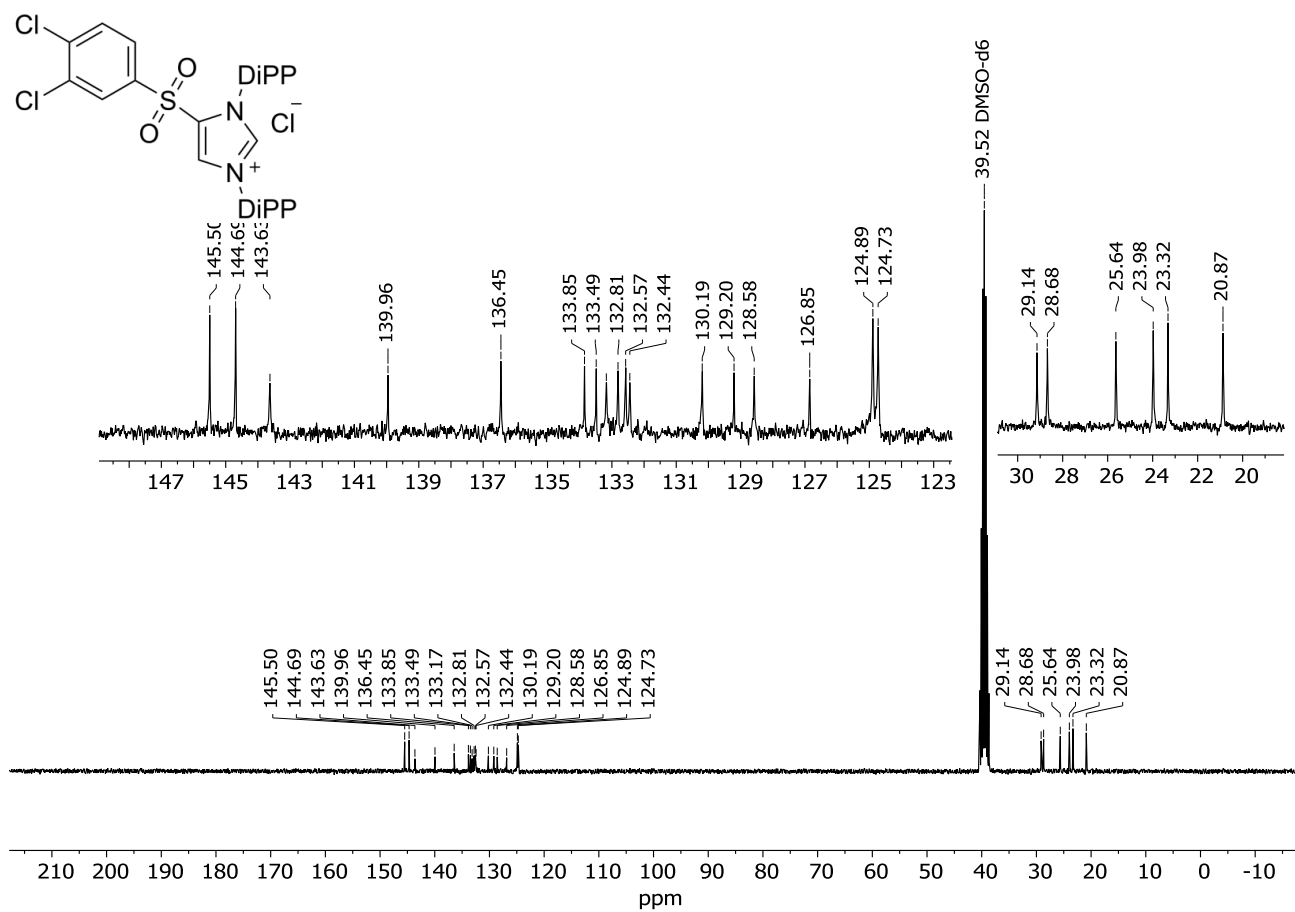

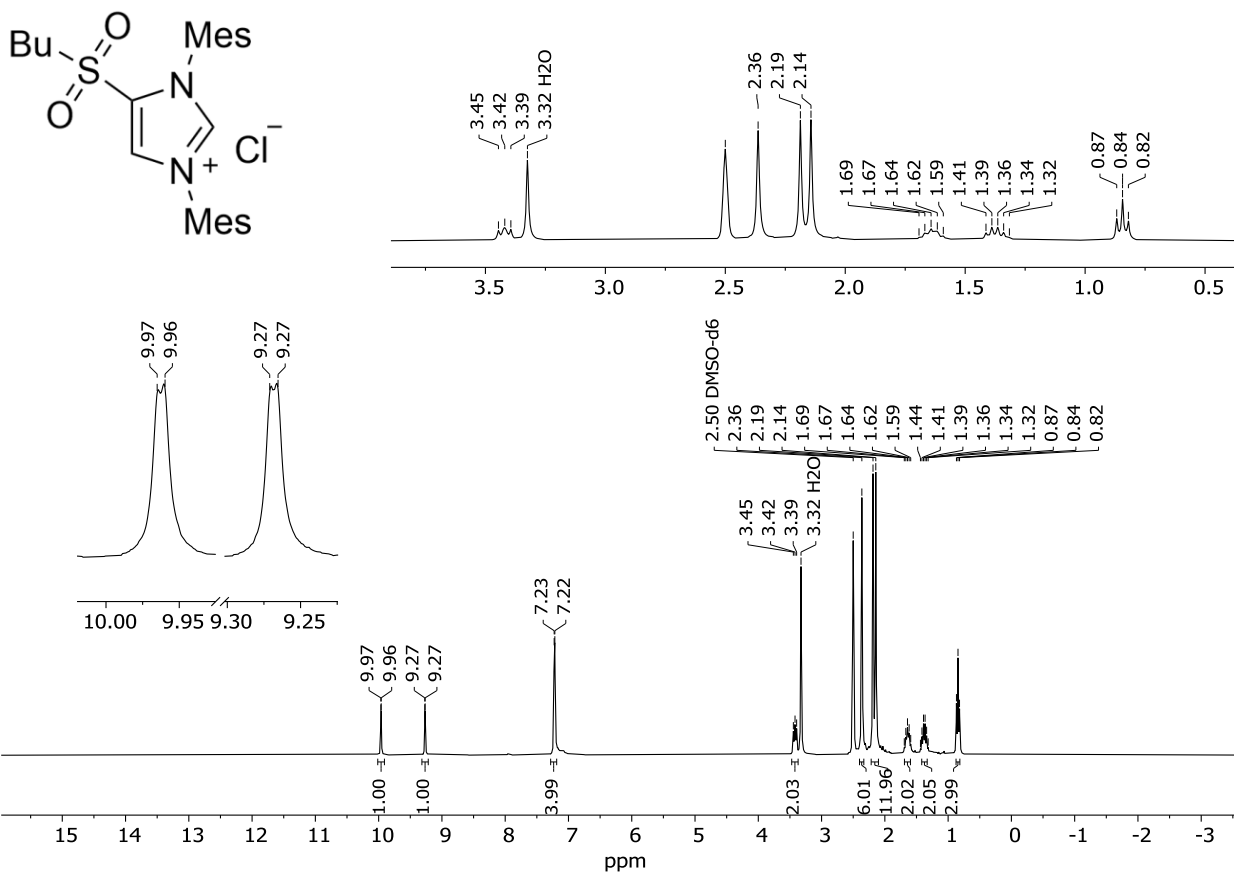

**Figure S9.**  $^1\text{H}$  NMR spectrum of **2f** (DMSO- $d_6$ , 300 MHz)

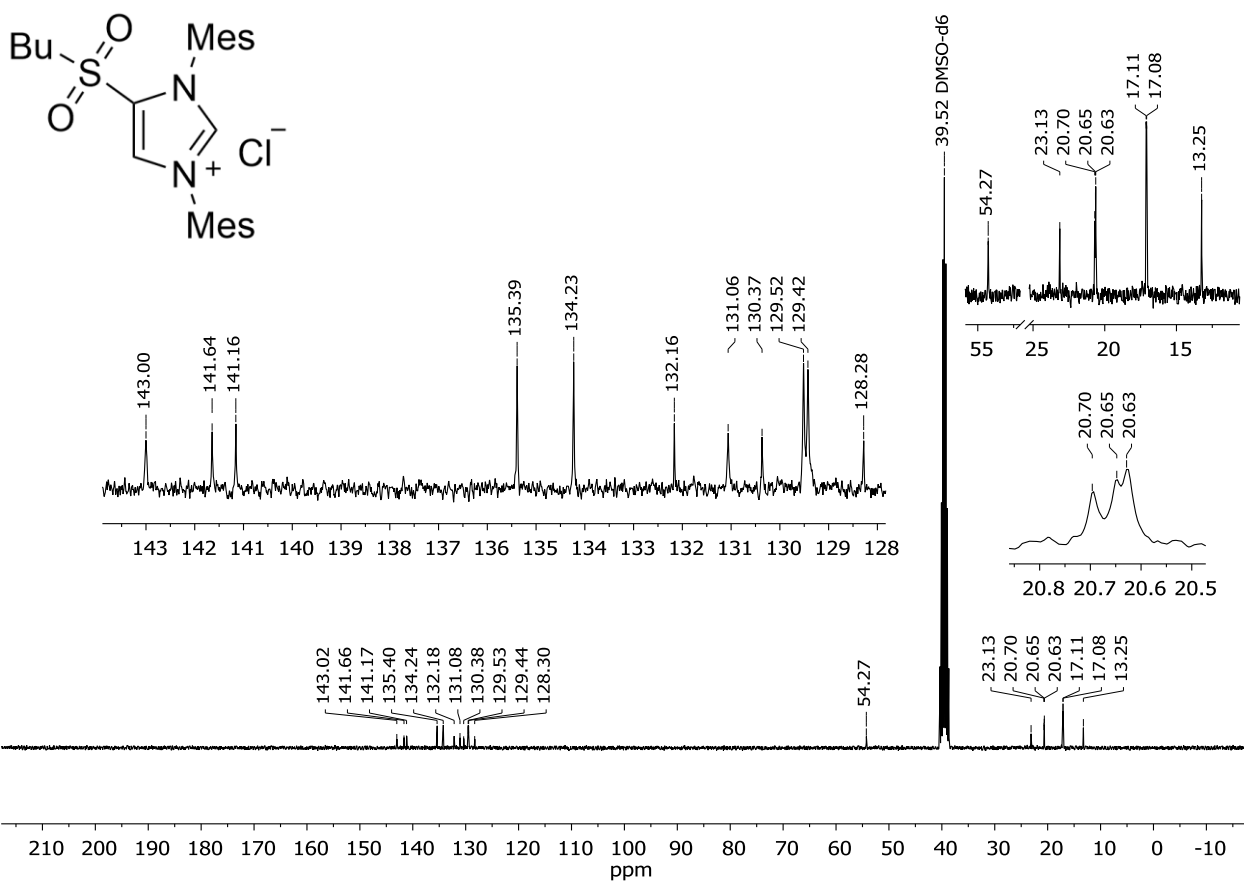

**Figure S10.**  $^{13}\text{C}$  NMR spectrum of **2f** (DMSO- $d_6$ , 75 MHz)

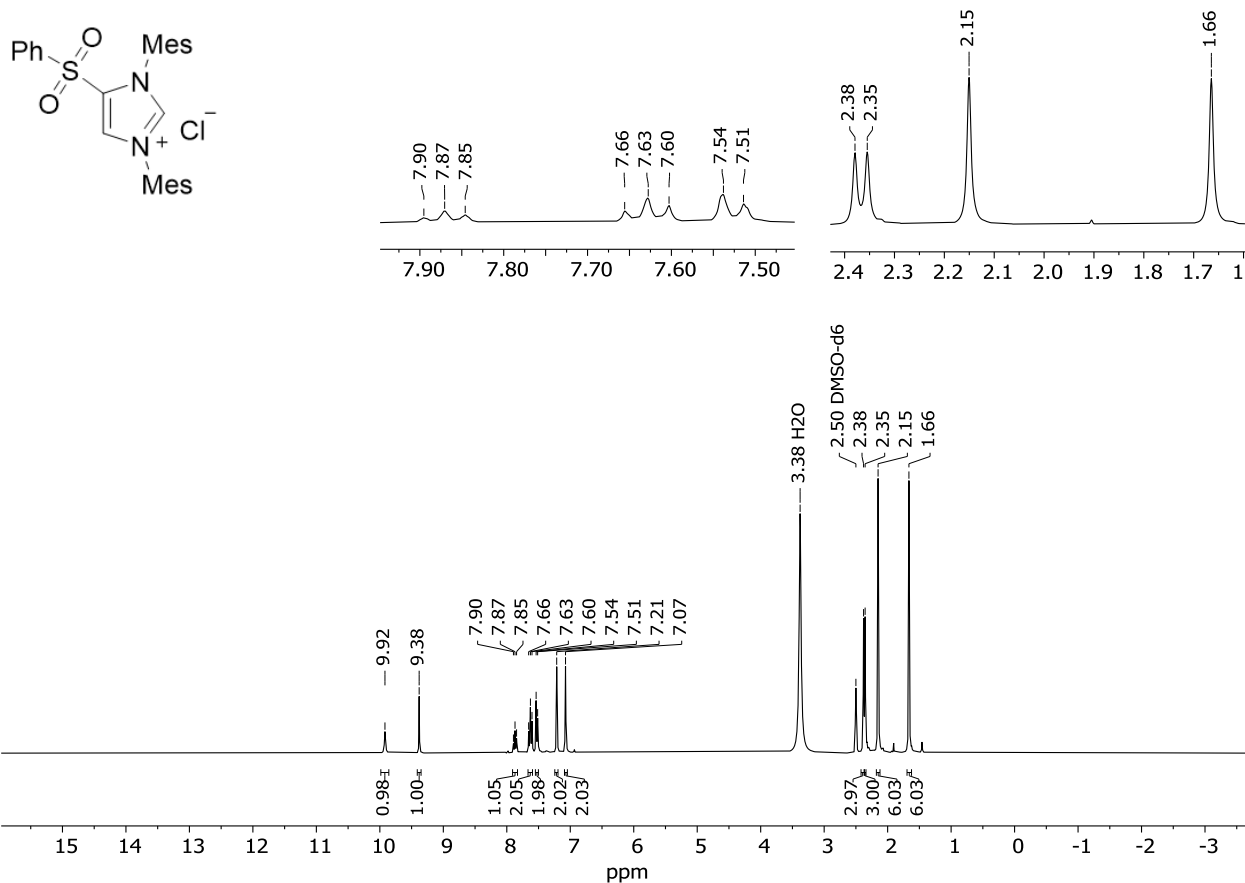

**Figure S11.**  $^1\text{H}$  NMR spectrum of **2g** (DMSO- $d_6$ , 300 MHz)

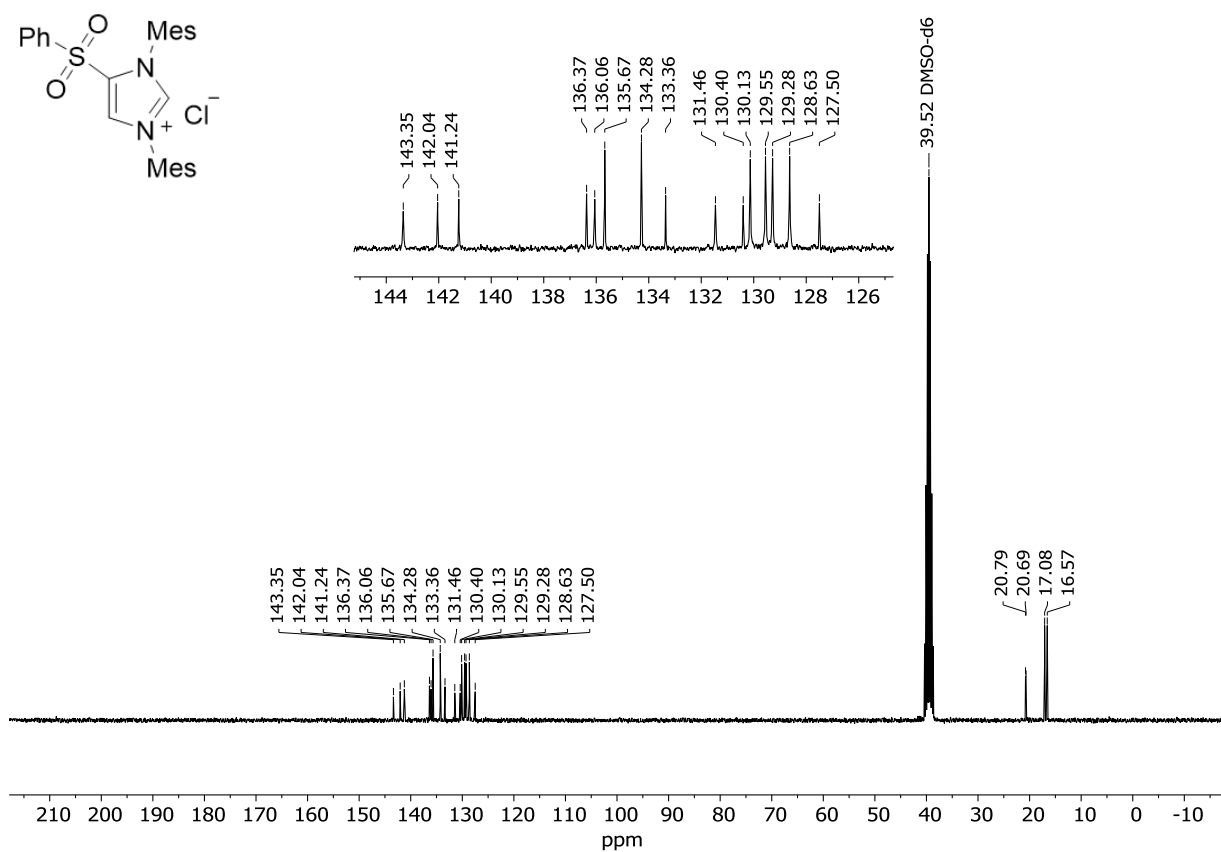

**Figure S12.**  $^{13}\text{C}$  NMR spectrum of **2g** (DMSO- $d_6$ , 75 MHz)

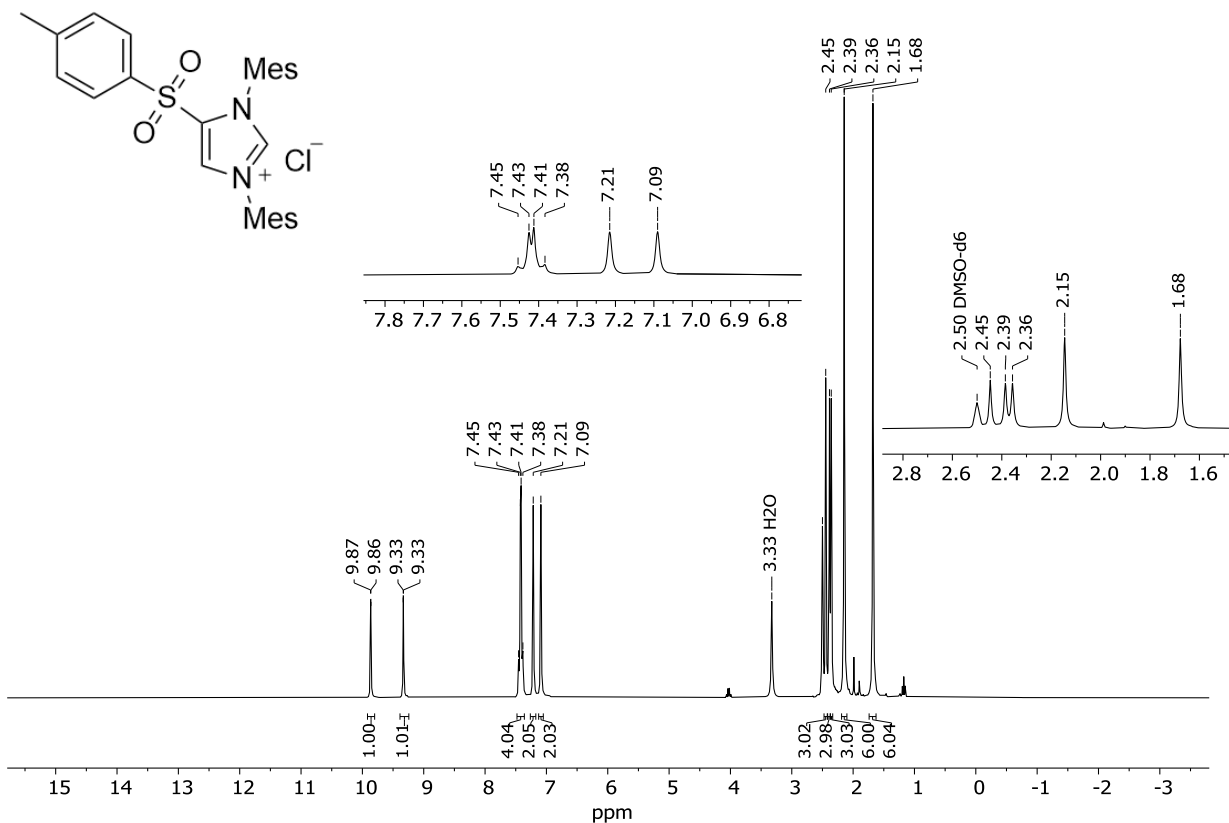

**Figure S13.**  $^1\text{H}$  NMR spectrum of **2h** (DMSO- $d_6$ , 300 MHz)

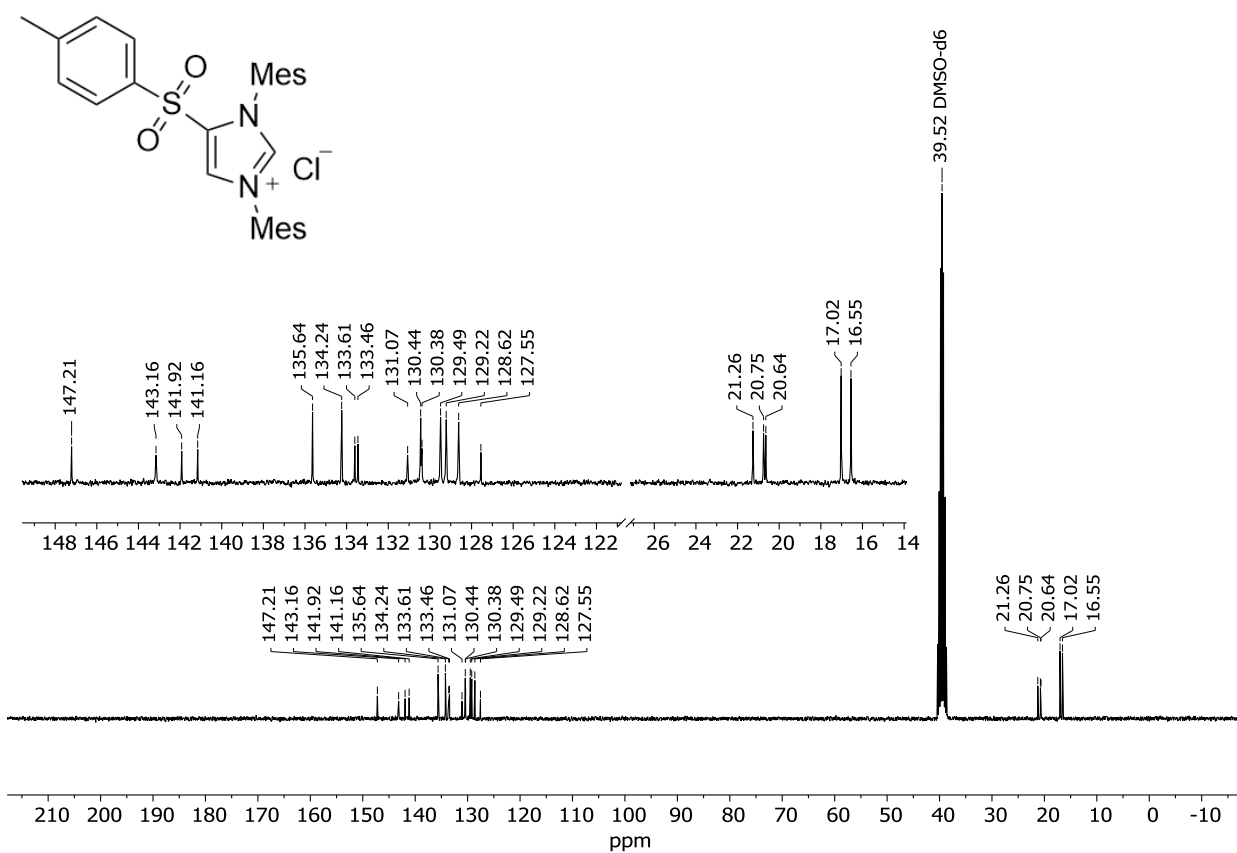

**Figure S14.**  $^{13}\text{C}$  NMR spectrum of **2h** (DMSO- $d_6$ , 75 MHz)

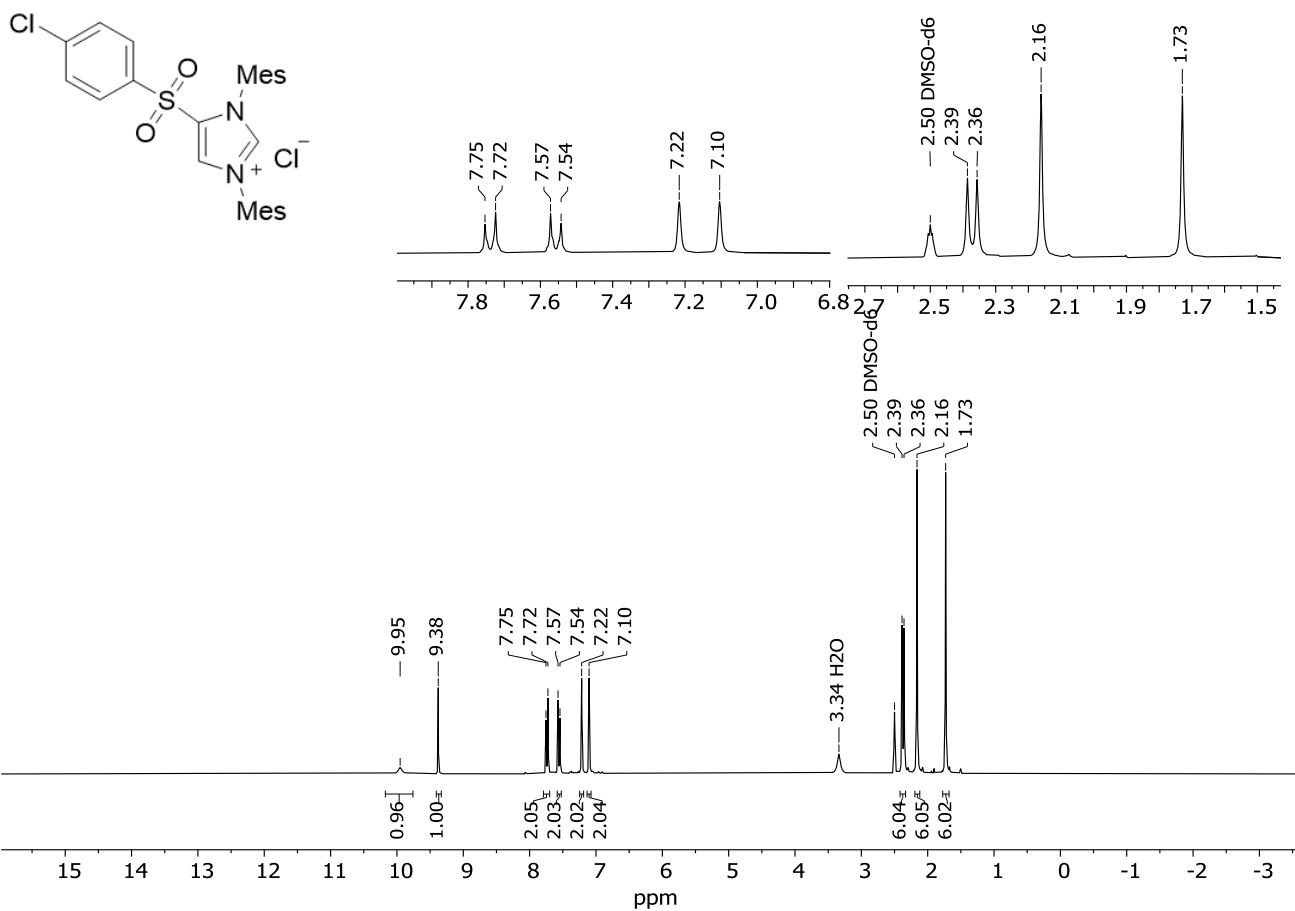

**Figure S15.**  $^1\text{H}$  NMR spectrum of **2i** (DMSO- $d_6$ , 300 MHz)

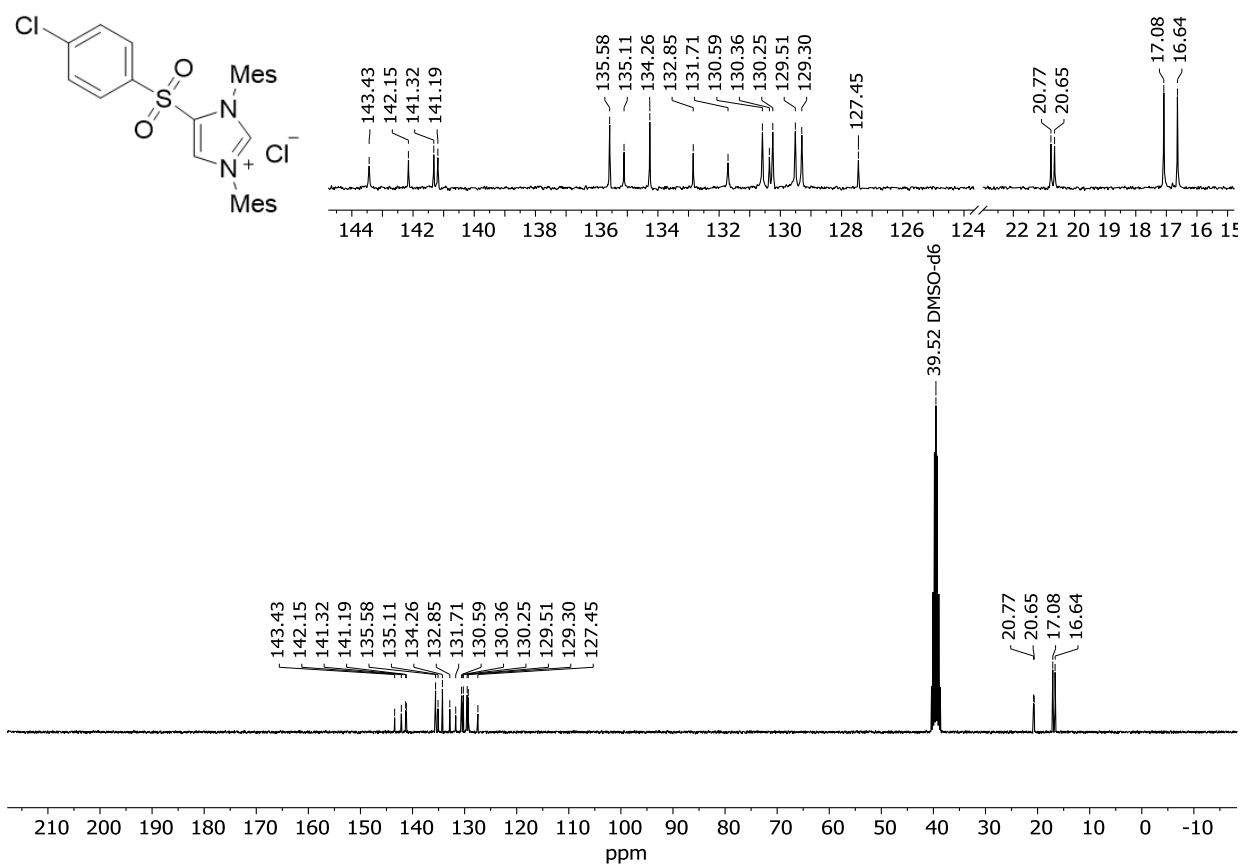

**Figure S16.**  $^{13}\text{C}$  NMR spectrum of **2i** (DMSO- $d_6$ , 75 MHz)

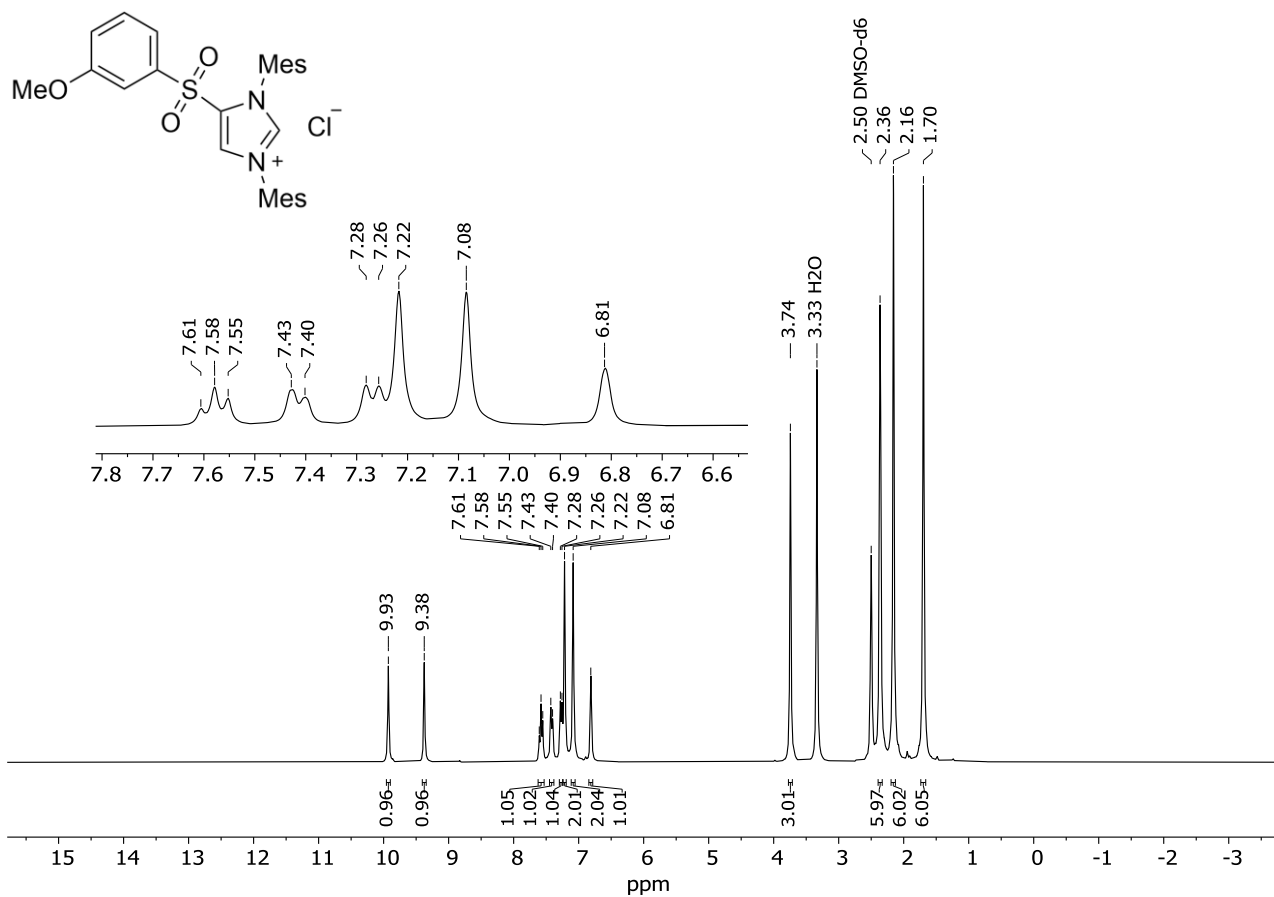

**Figure S17.**  $^1\text{H}$  NMR spectrum of **2j** (DMSO- $d_6$ , 300 MHz)

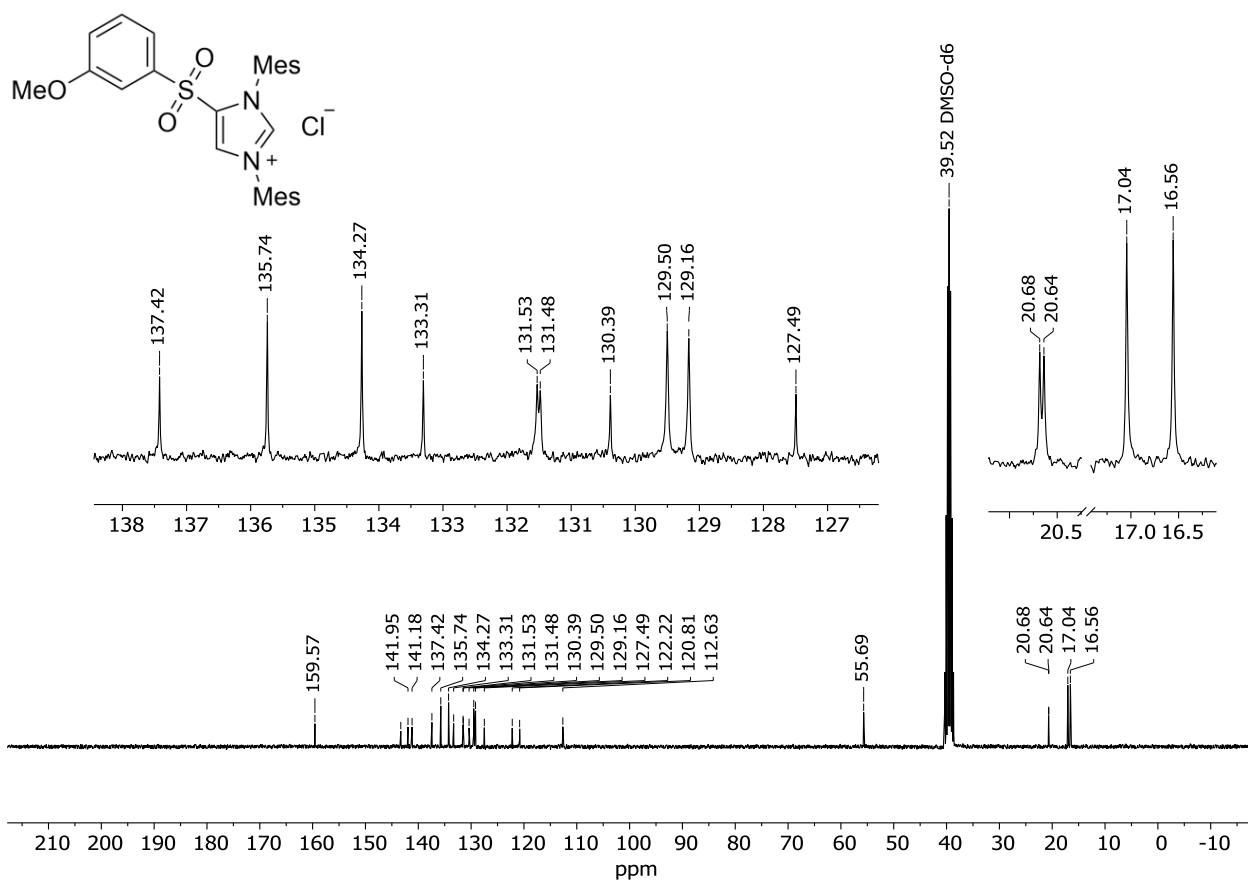

**Figure S18.**  $^{13}\text{C}$  NMR spectrum of **2j** (DMSO- $d_6$ , 75 MHz)

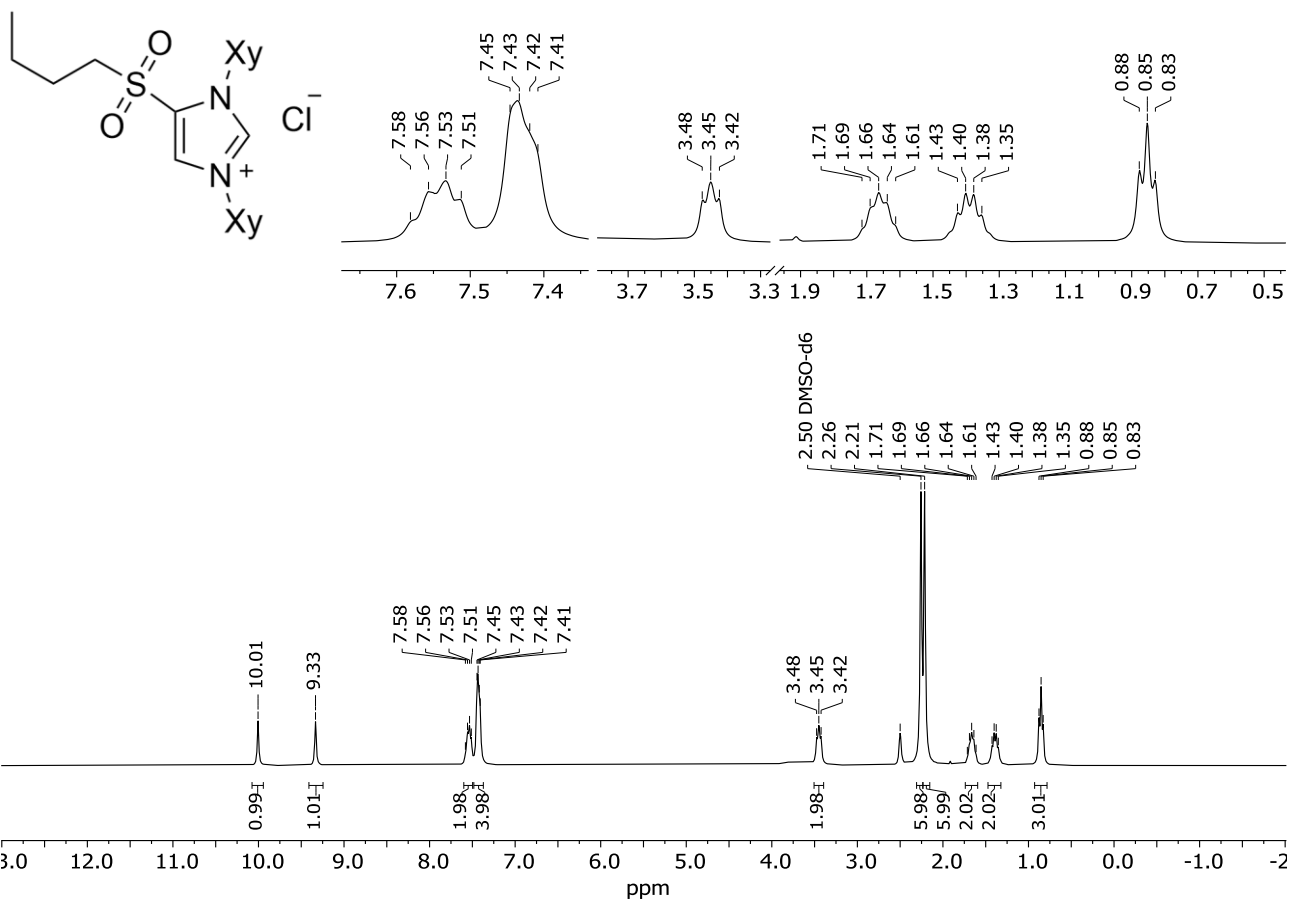

**Figure S19.**  $^1\text{H}$  NMR spectrum of **2k** (DMSO- $d_6$ , 300 MHz)

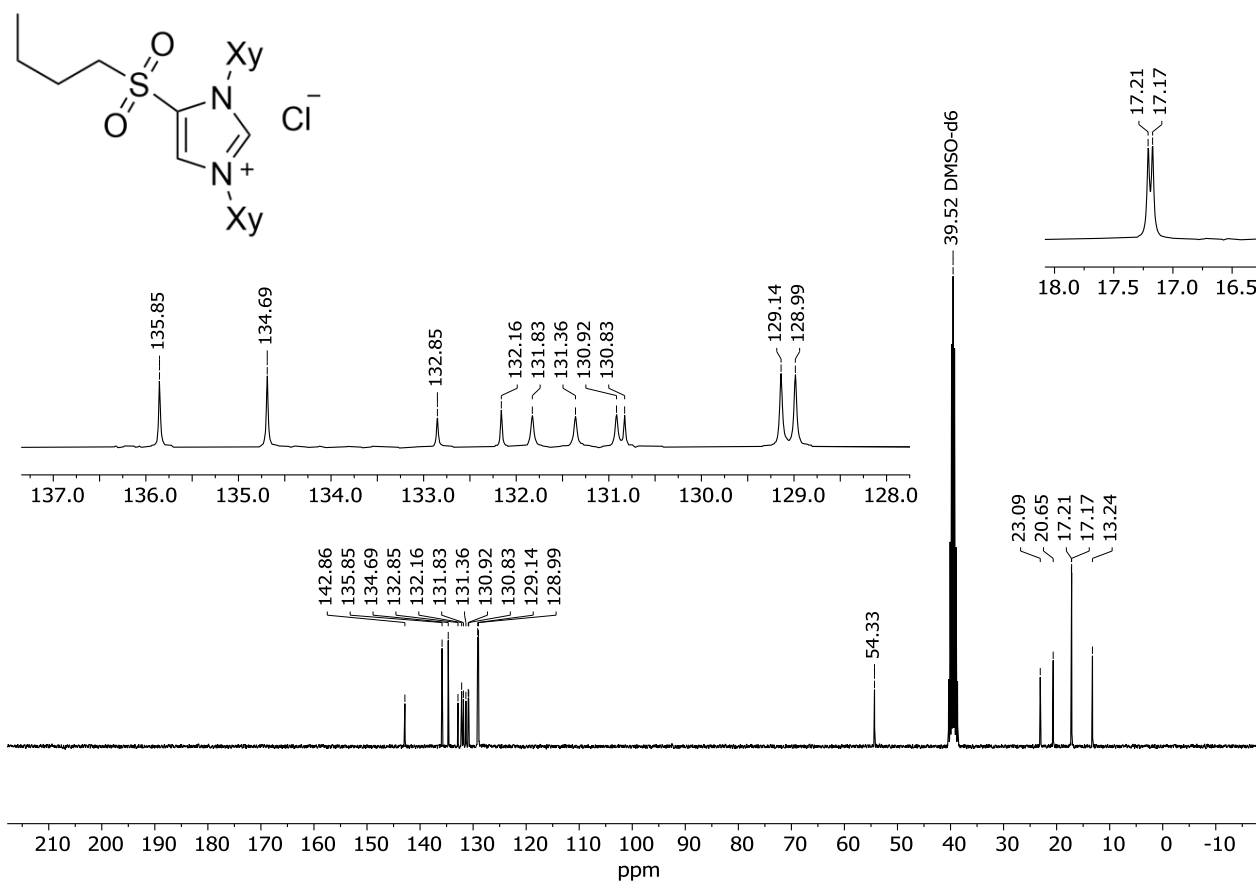

**Figure S20.**  $^{13}\text{C}$  NMR spectrum of **2k** (DMSO- $d_6$ , 75 MHz)



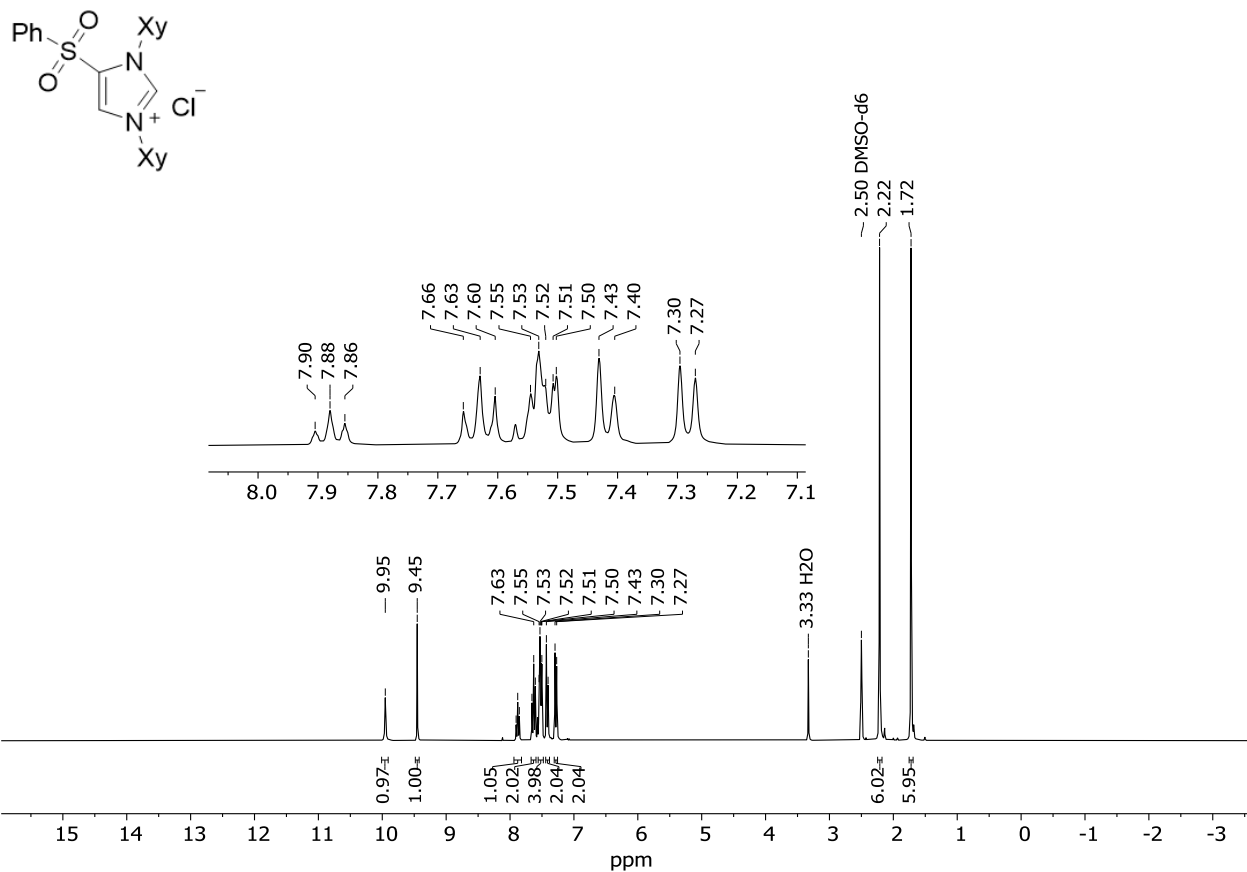

**Figure S21.**  $^1\text{H}$  NMR spectrum of **2I** (DMSO- $d_6$ , 300 MHz)

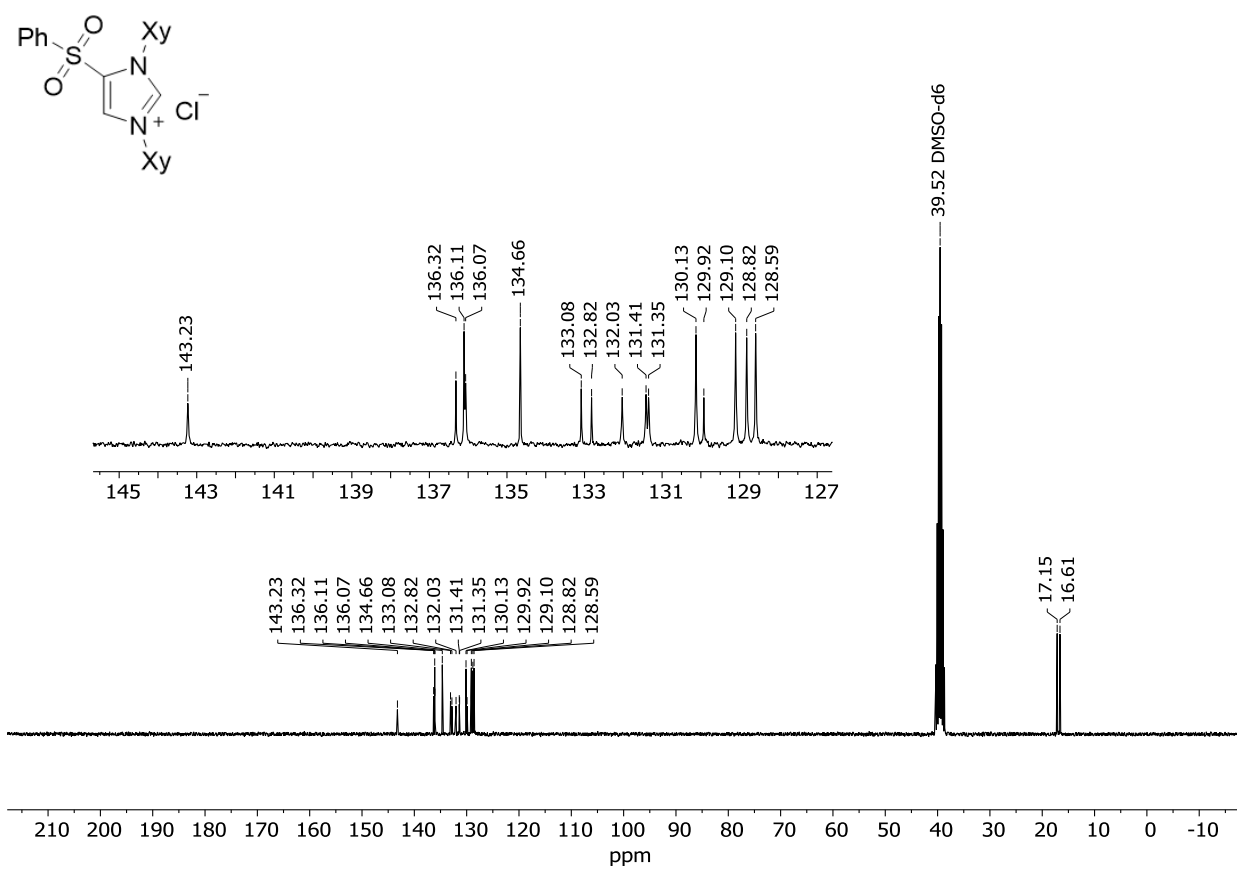

**Figure S22.**  $^{13}\text{C}$  NMR spectrum of **2I** (DMSO- $d_6$ , 75 MHz)

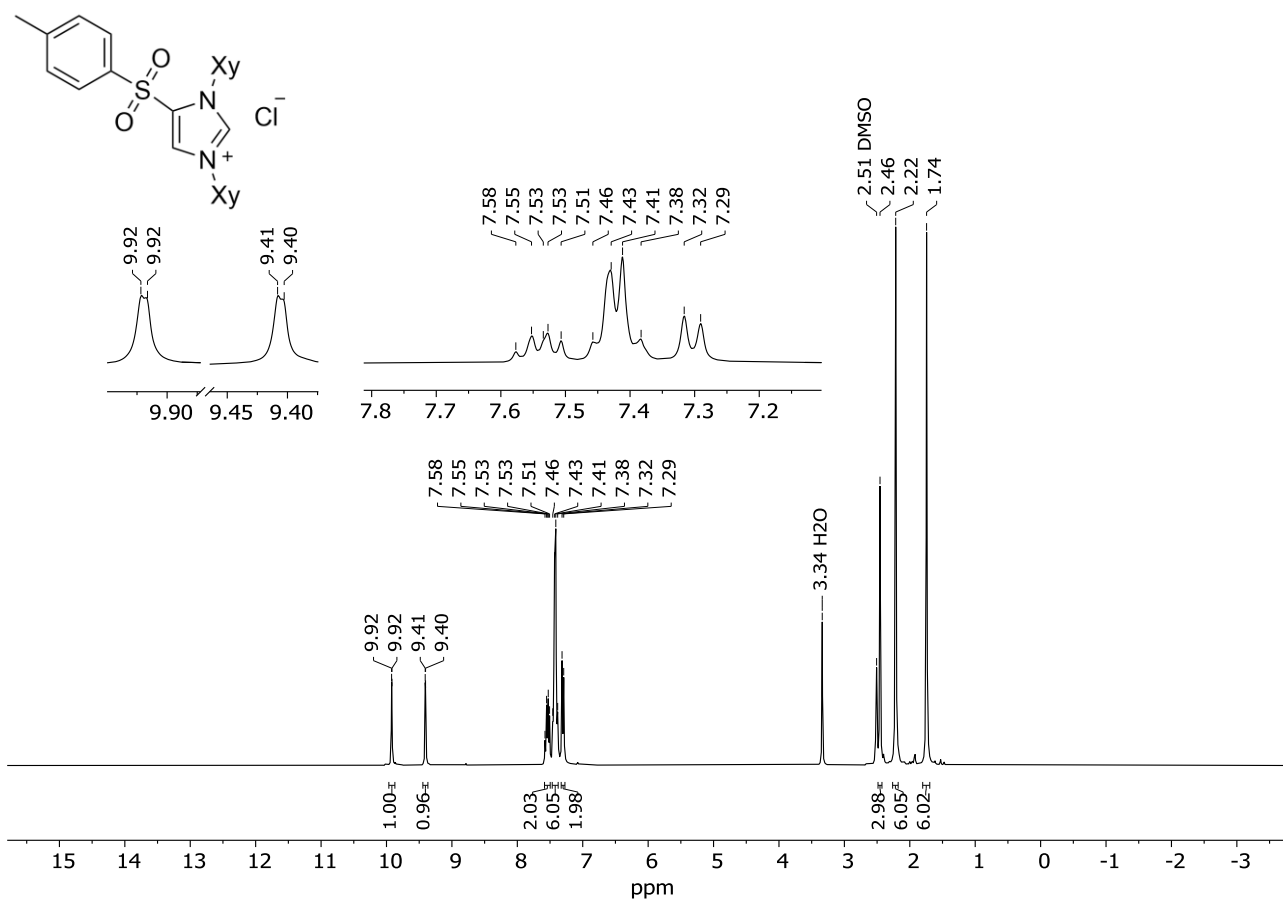

**Figure S23.**  $^1\text{H}$  NMR spectrum of **2m** (DMSO- $d_6$ , 300 MHz)

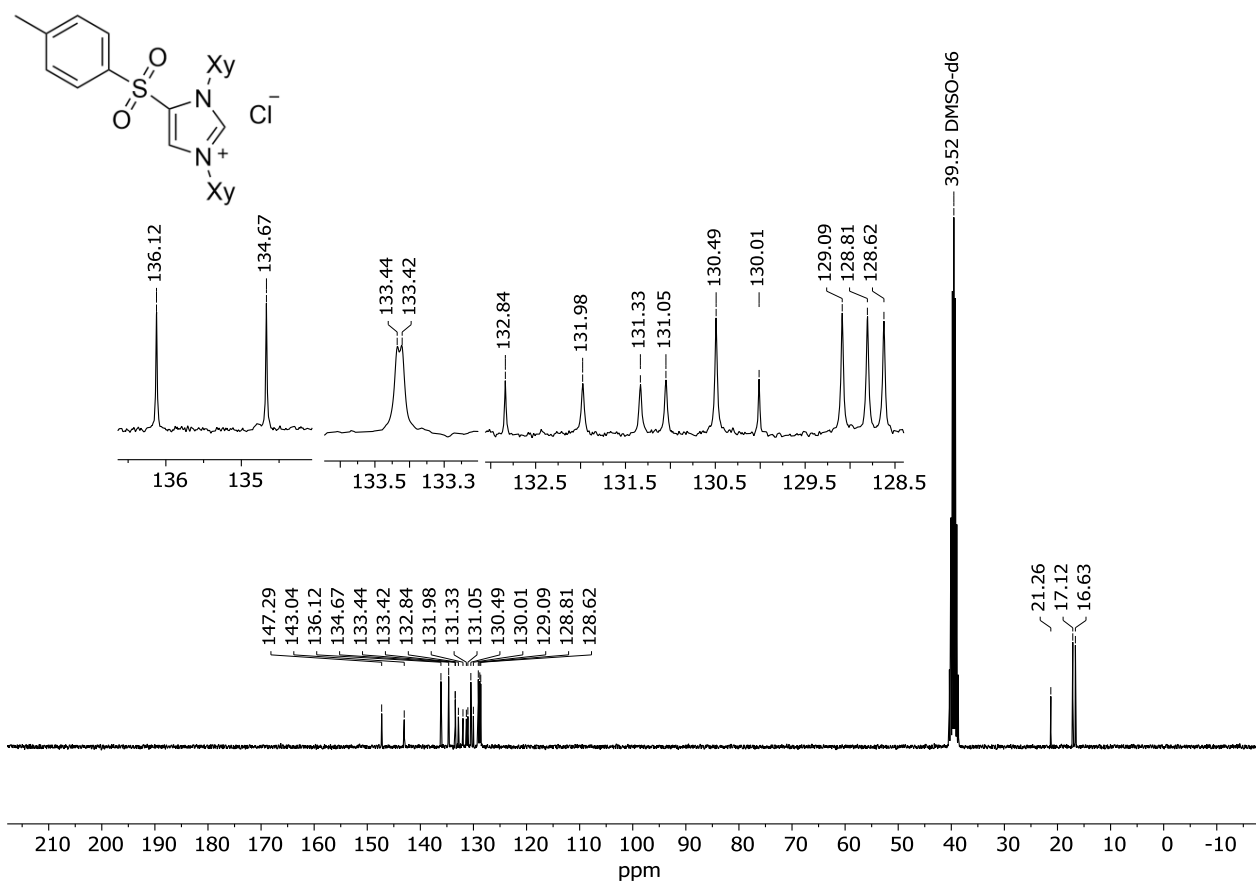

**Figure S24.**  $^{13}\text{C}$  NMR spectrum of **2m** (DMSO- $d_6$ , 75 MHz)

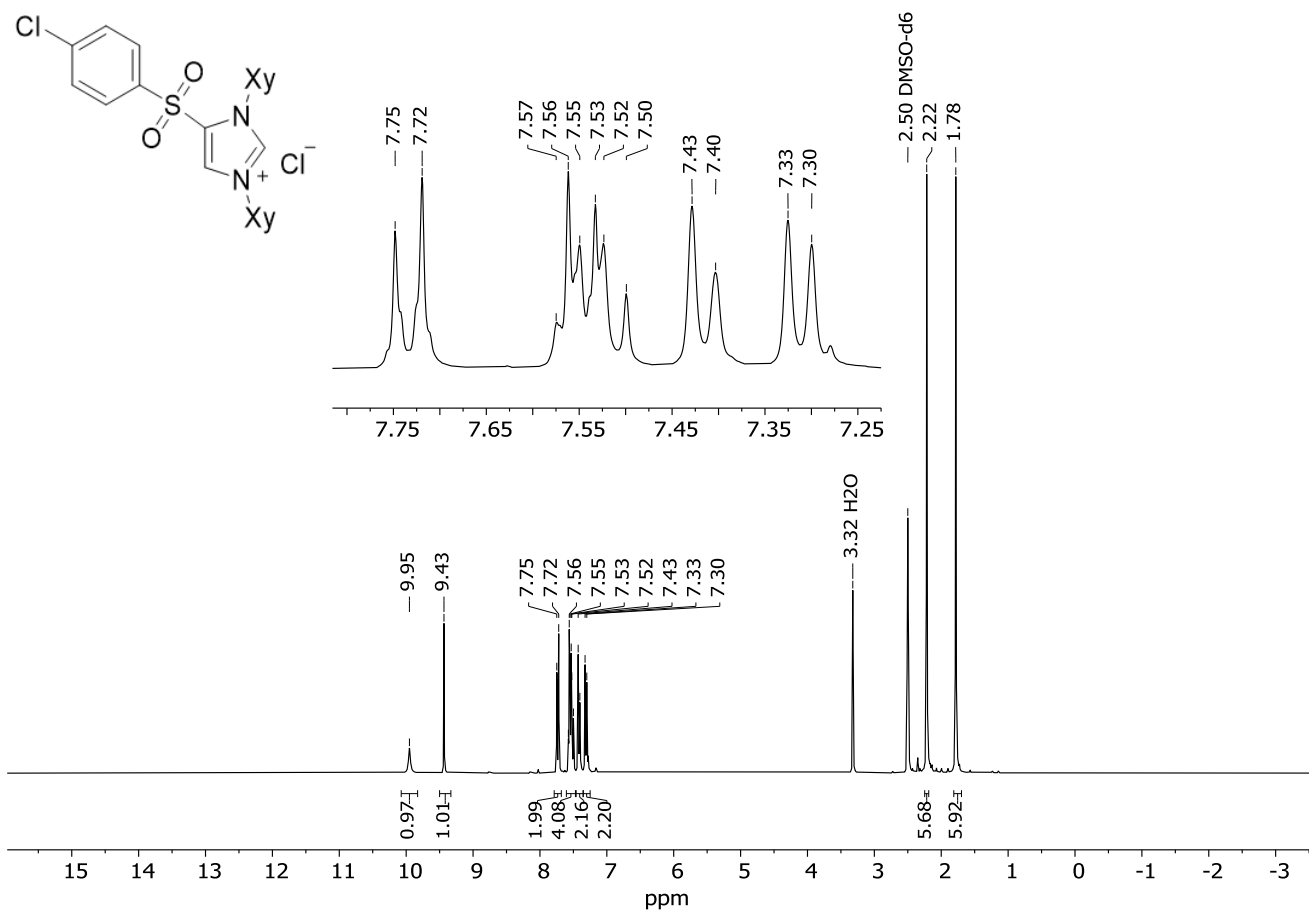

**Figure S25.**  $^1\text{H}$  NMR spectrum of **2n** (DMSO- $d_6$ , 300 MHz)

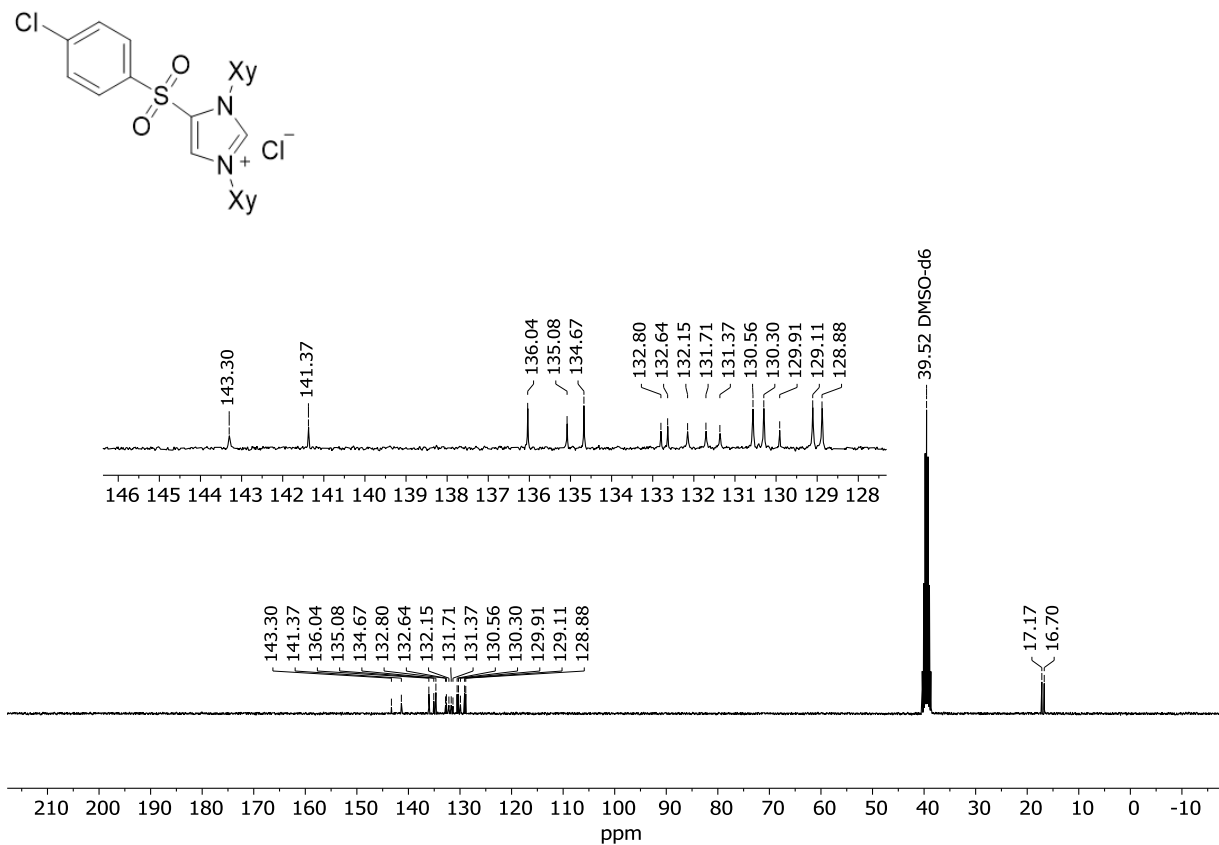

**Figure S26.**  $^{13}\text{C}$  NMR spectrum of **2n** (DMSO- $d_6$ , 75 MHz)

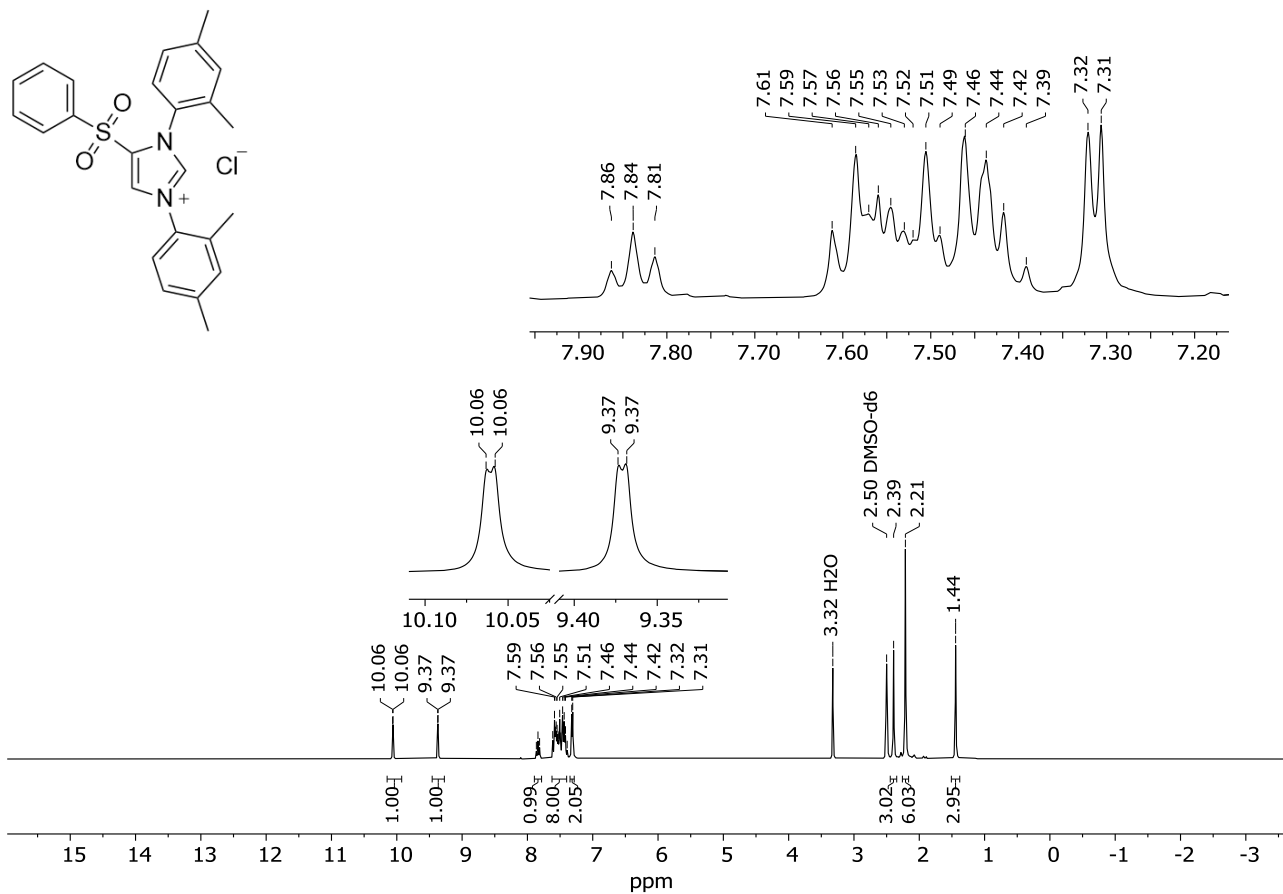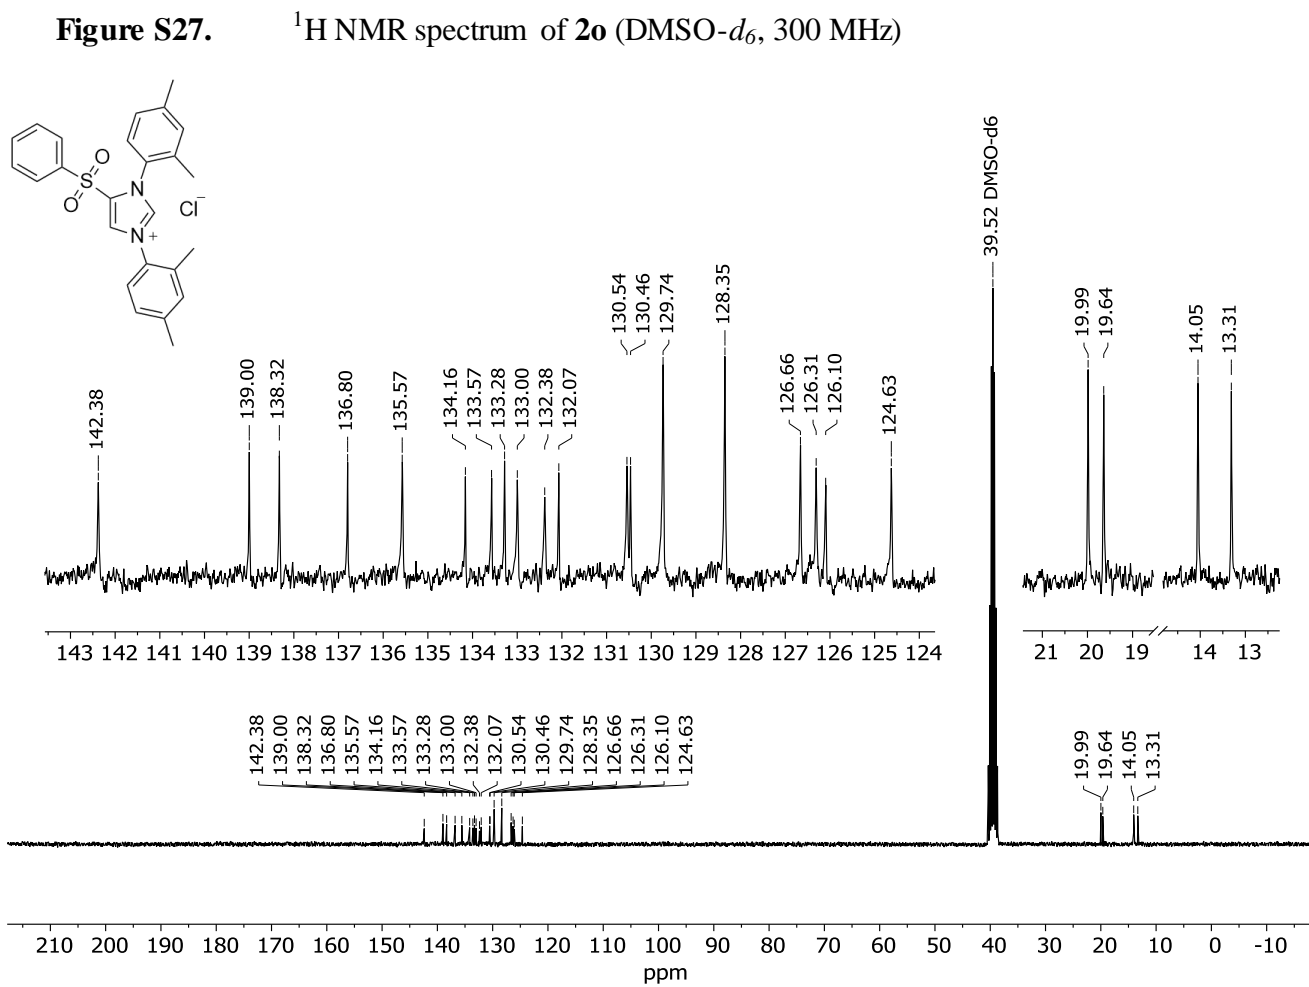

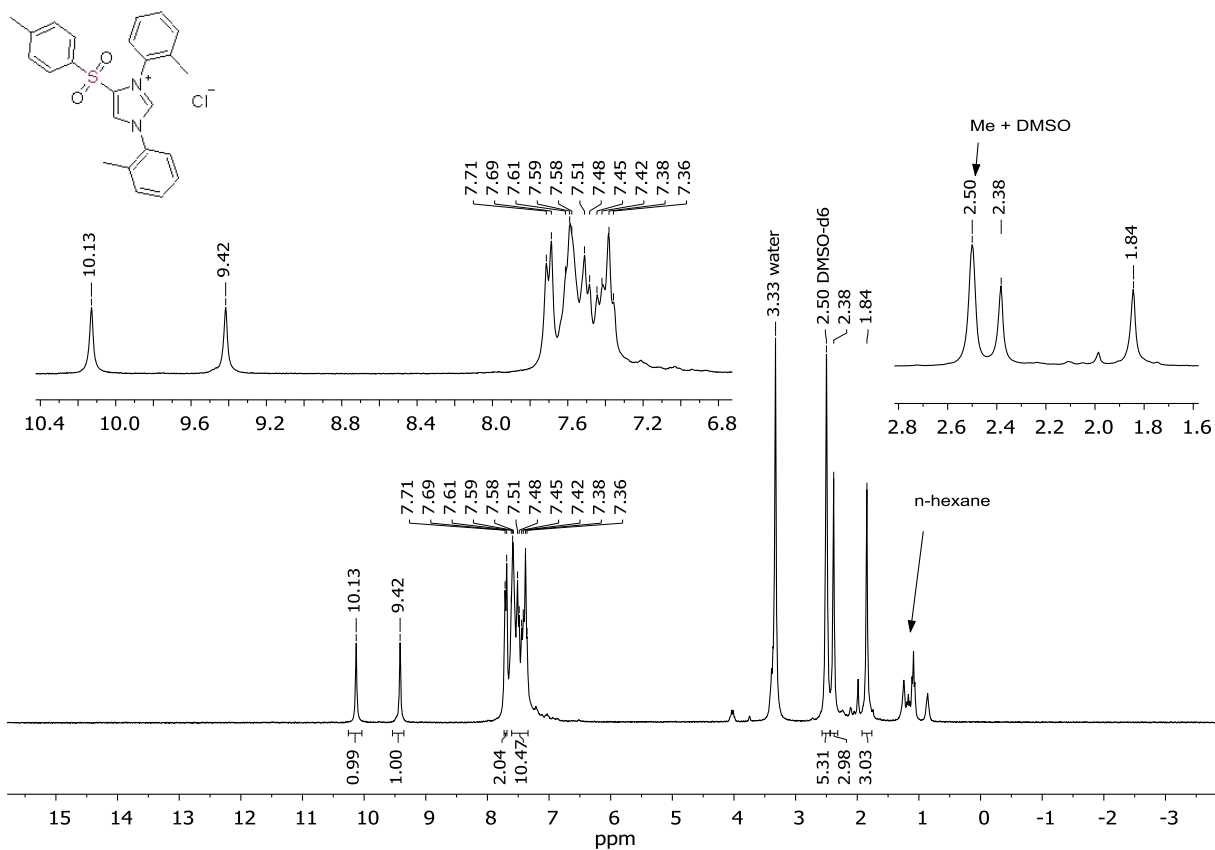

**Figure S29.**  $^1\text{H}$  NMR spectrum of **2p** ( $\text{DMSO-}d_6$ , 300 MHz)

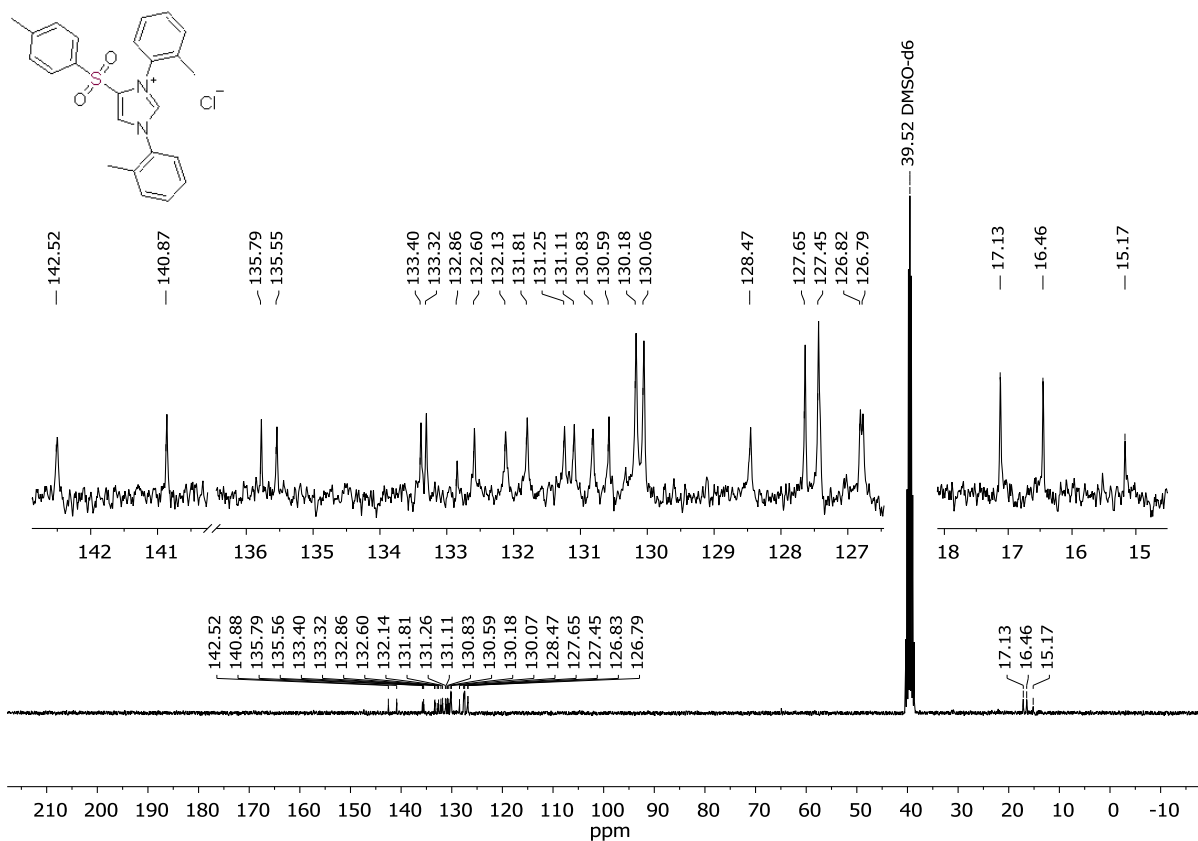

**Figure S30.**  $^{13}\text{C}$  NMR spectrum of **2p** ( $\text{DMSO-}d_6$ , 75 MHz)

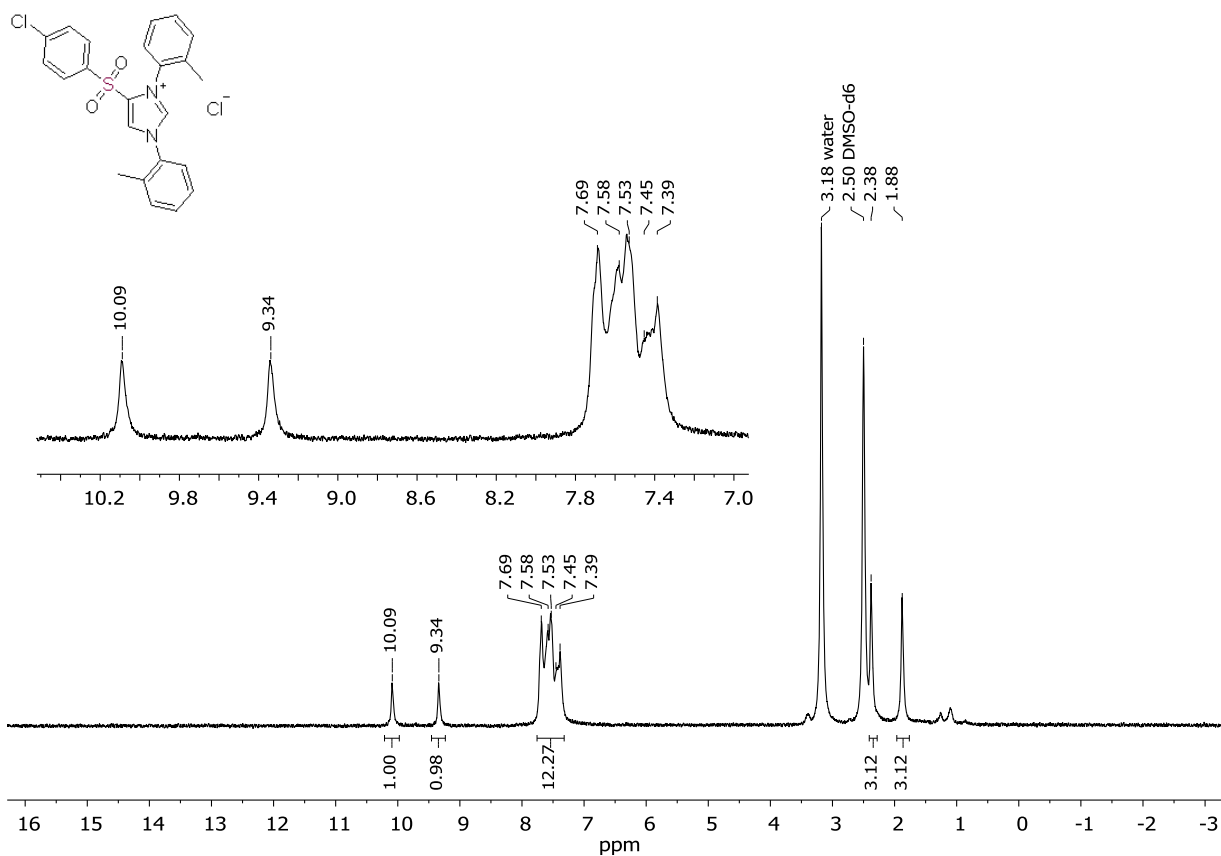

**Figure S31.** <sup>1</sup>H NMR spectrum of **2q** (DMSO-*d*<sub>6</sub>, 300 MHz)

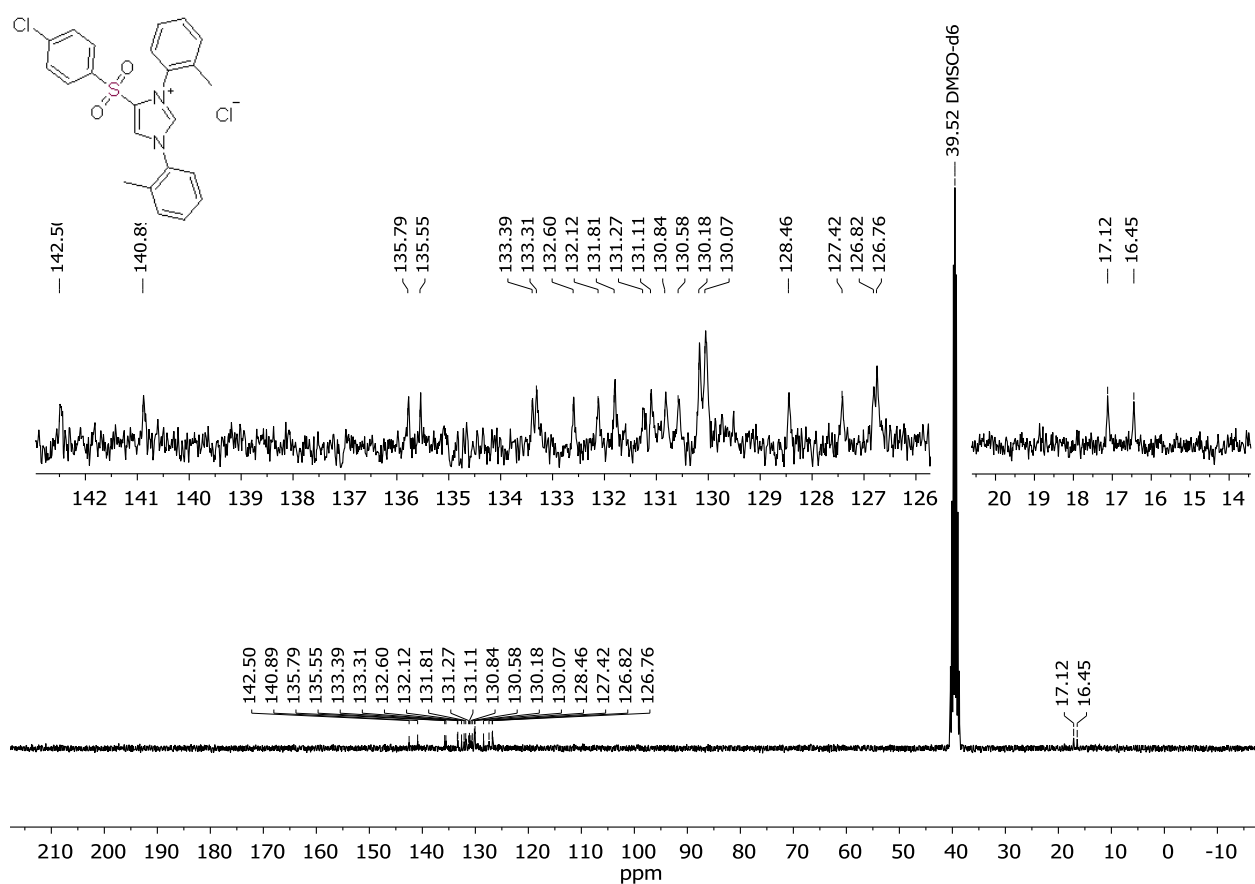

**Figure S32.** <sup>13</sup>C NMR spectrum of **2q** (DMSO-*d*<sub>6</sub>, 75 MHz)

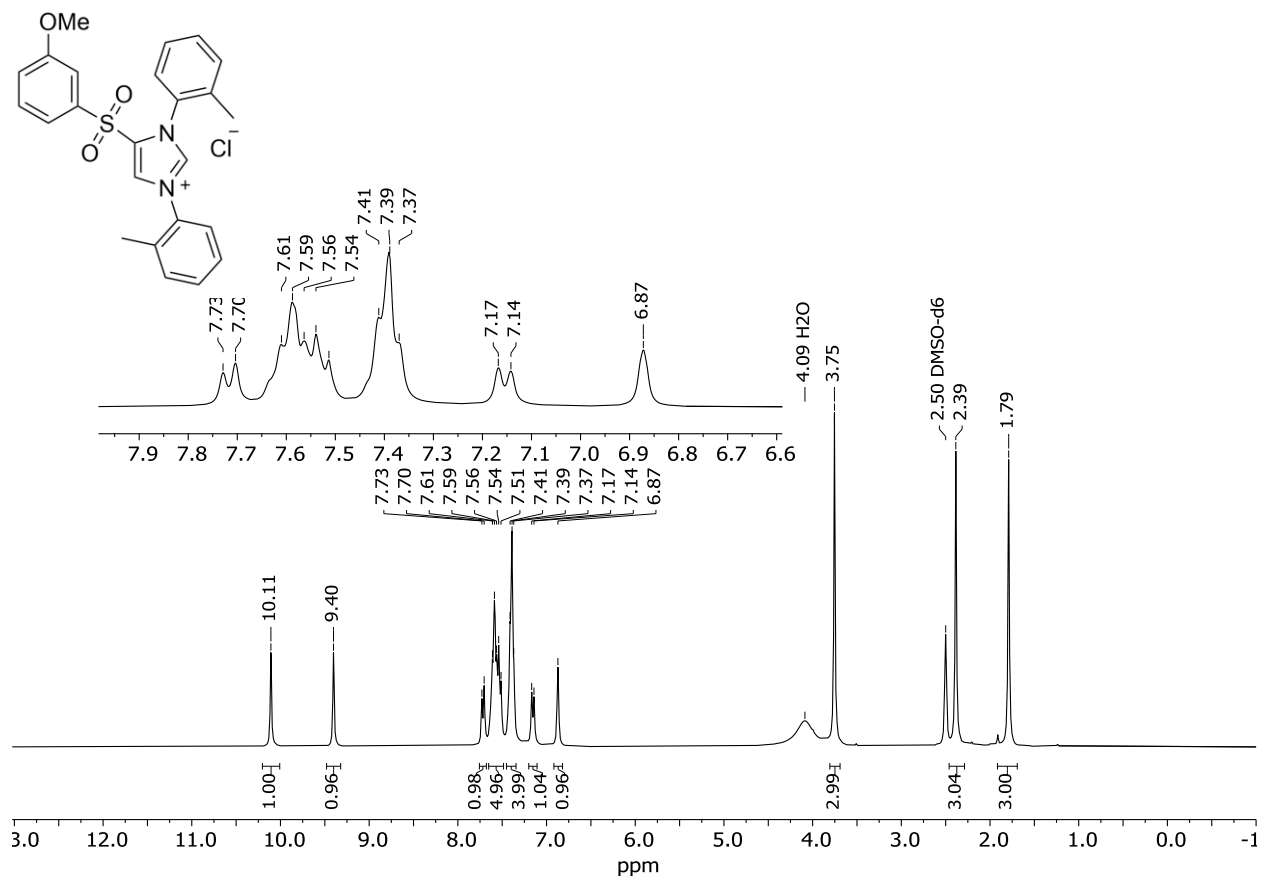

**Figure S33.**  $^1\text{H}$  NMR spectrum of **2r** (DMSO- $d_6$ , 300 MHz)

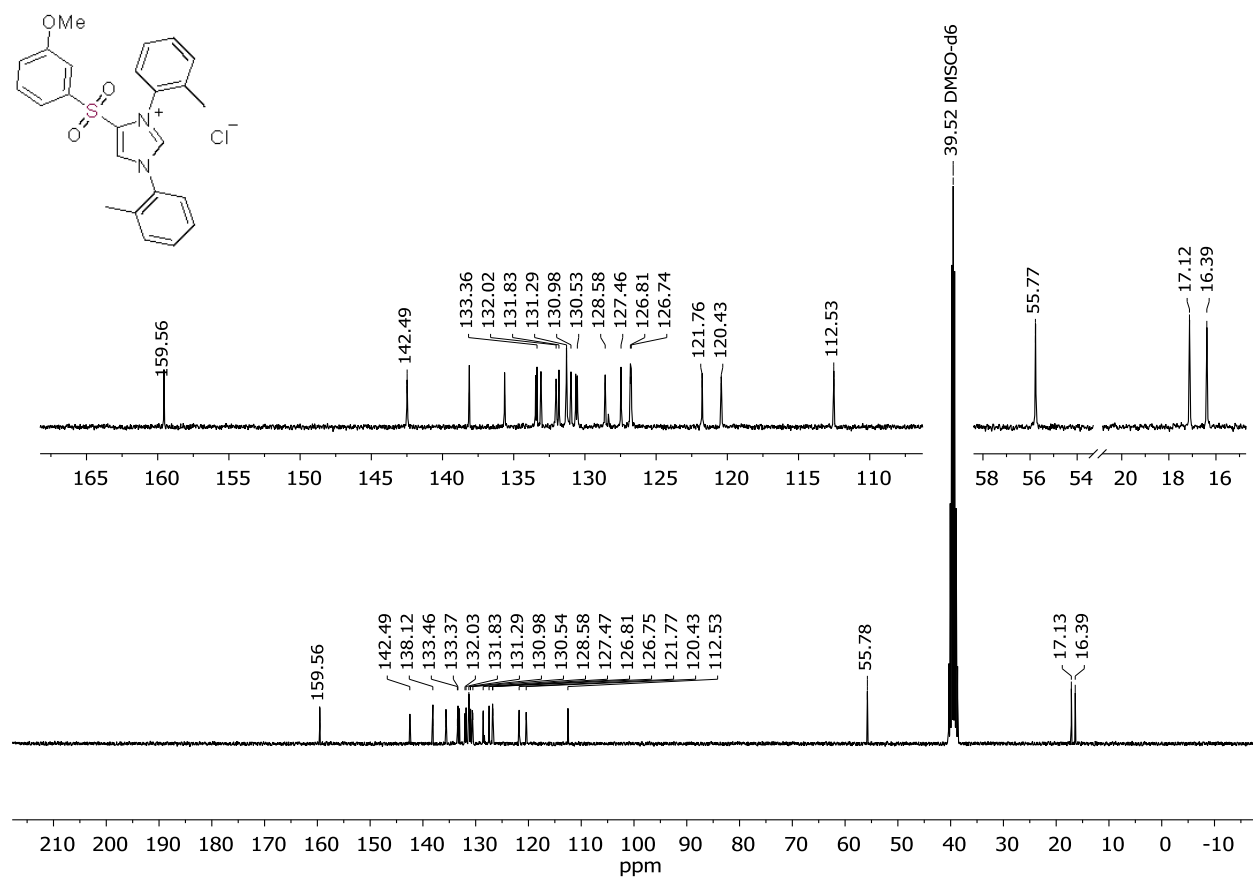

**Figure S34.**  $^{13}\text{C}$  NMR spectrum of **2r** (DMSO- $d_6$ , 75 MHz)

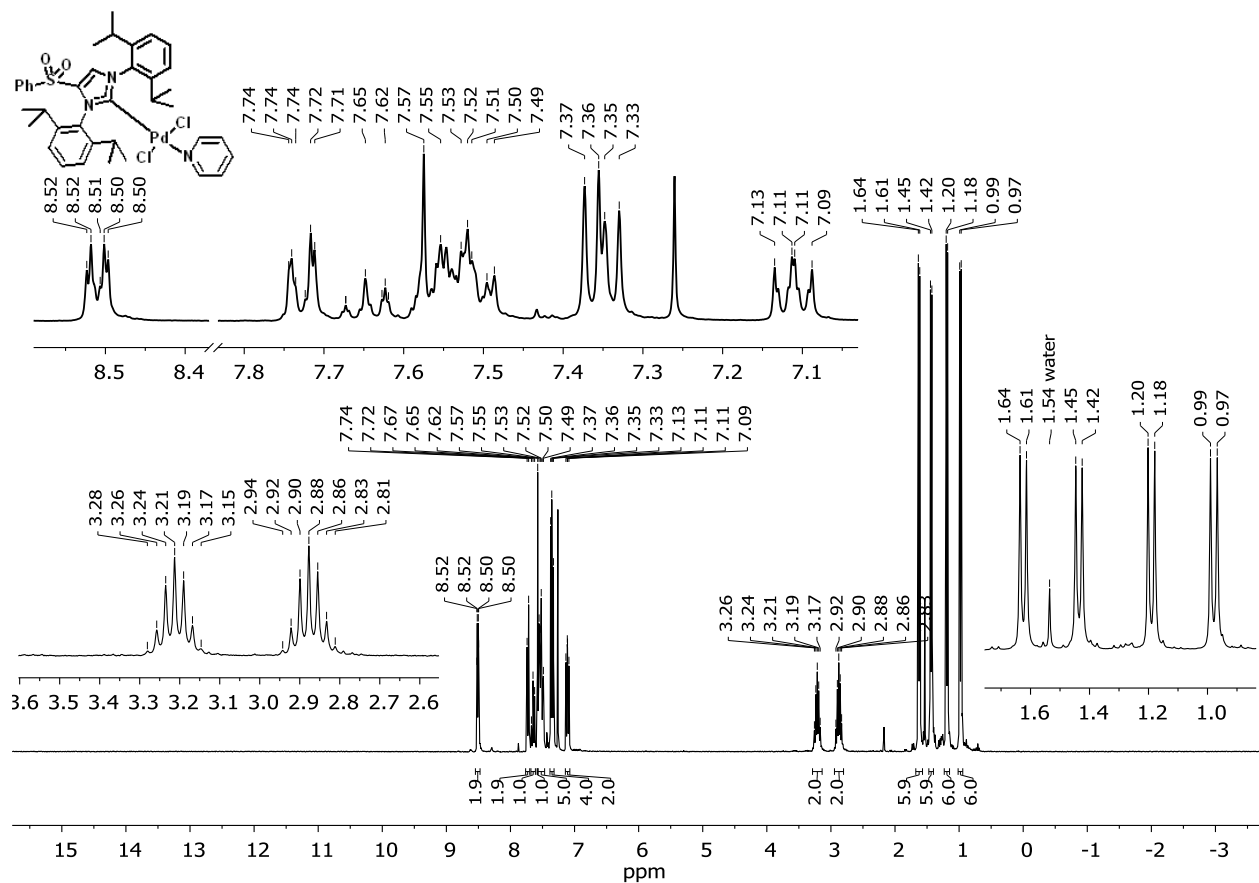

**Figure S35.**  $^1\text{H}$  NMR spectrum of **3a** ( $\text{CDCl}_3$ , 300 MHz)

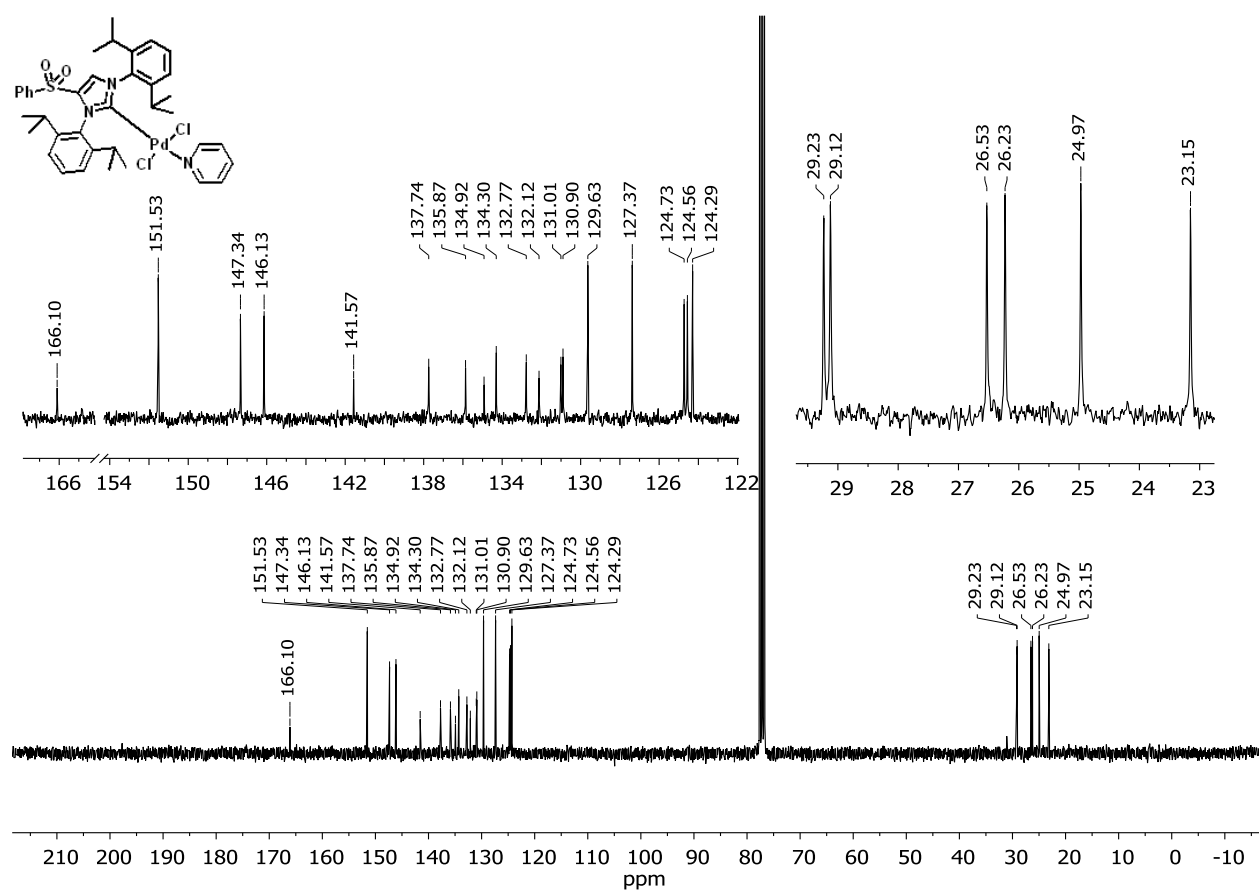

**Figure S36.**  $^{13}\text{C}$  NMR spectrum of **3a** ( $\text{CDCl}_3$ , 75 MHz)



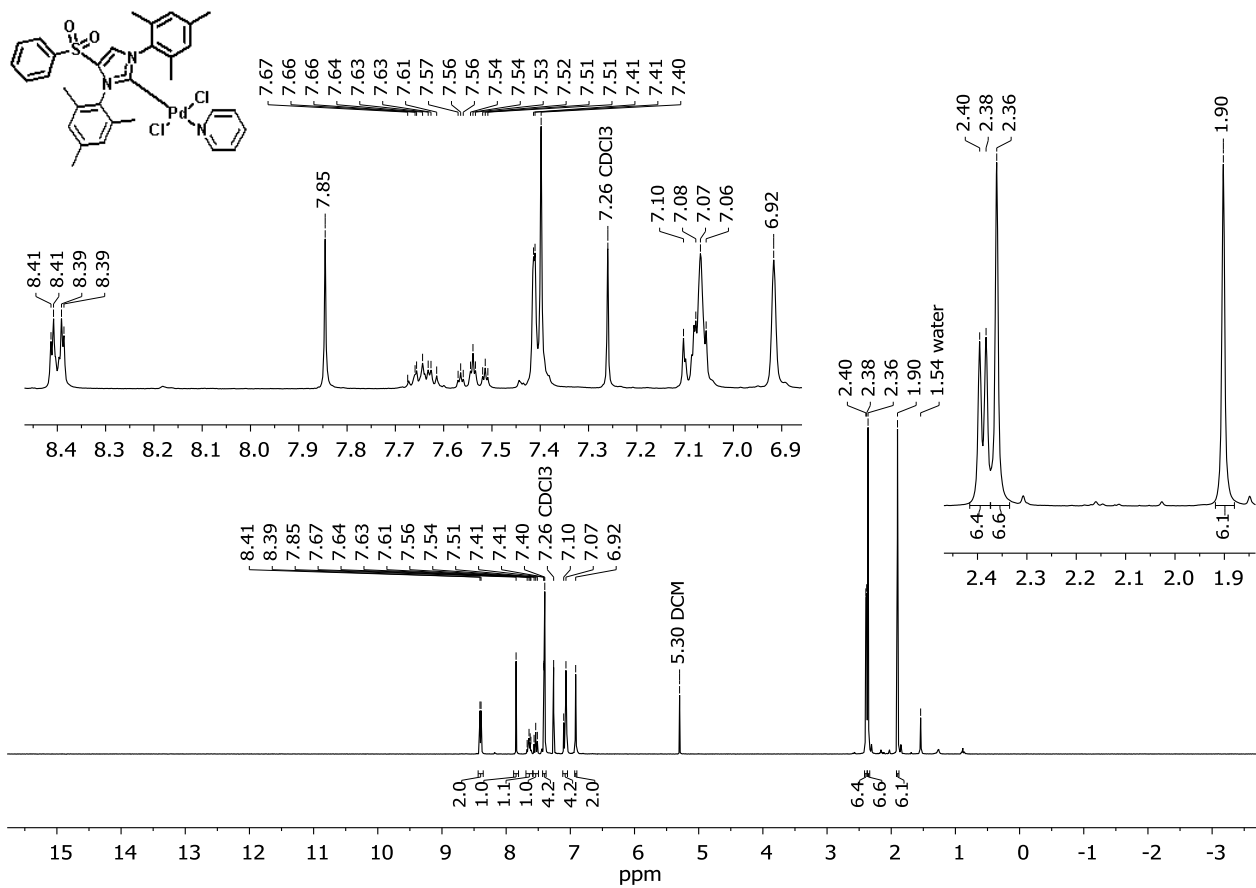

**Figure S37.**  $^1\text{H}$  NMR spectrum of **3b** ( $\text{CDCl}_3$ , 300 MHz)

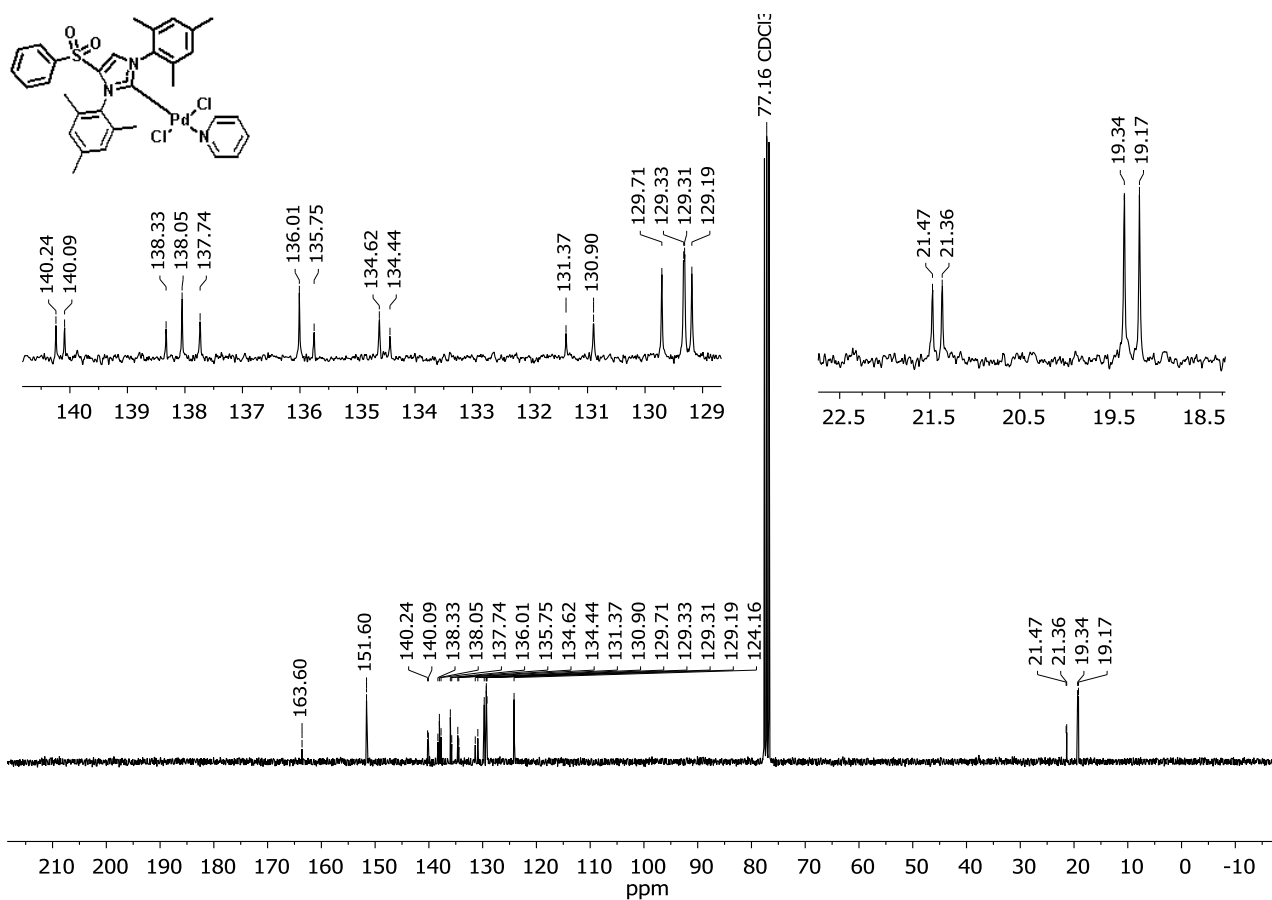

**Figure S38.**  $^{13}\text{C}$  NMR spectrum of **3b** ( $\text{CDCl}_3$ , 75 MHz)

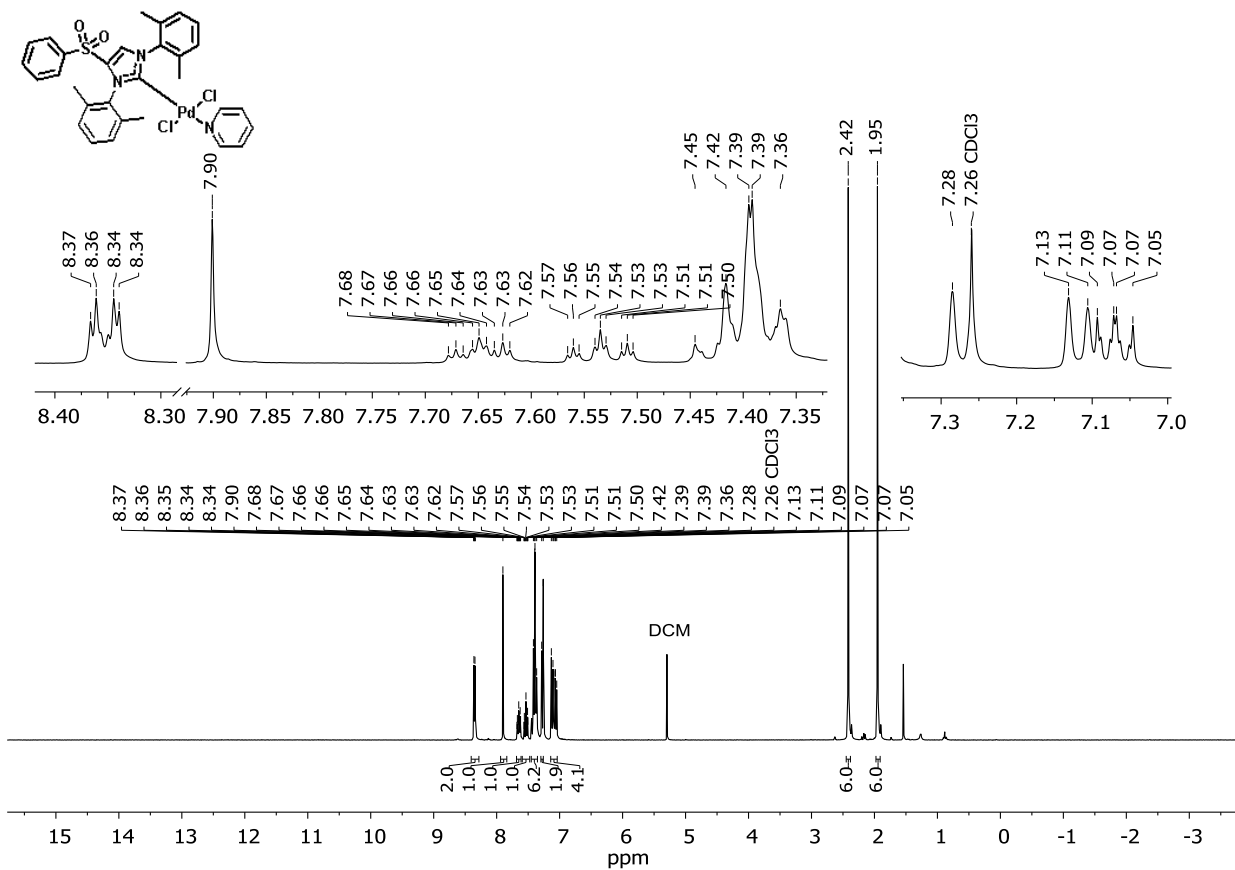

**Figure S39.**  $^1\text{H}$  NMR spectrum of **3c** (CDCl<sub>3</sub>, 300 MHz)

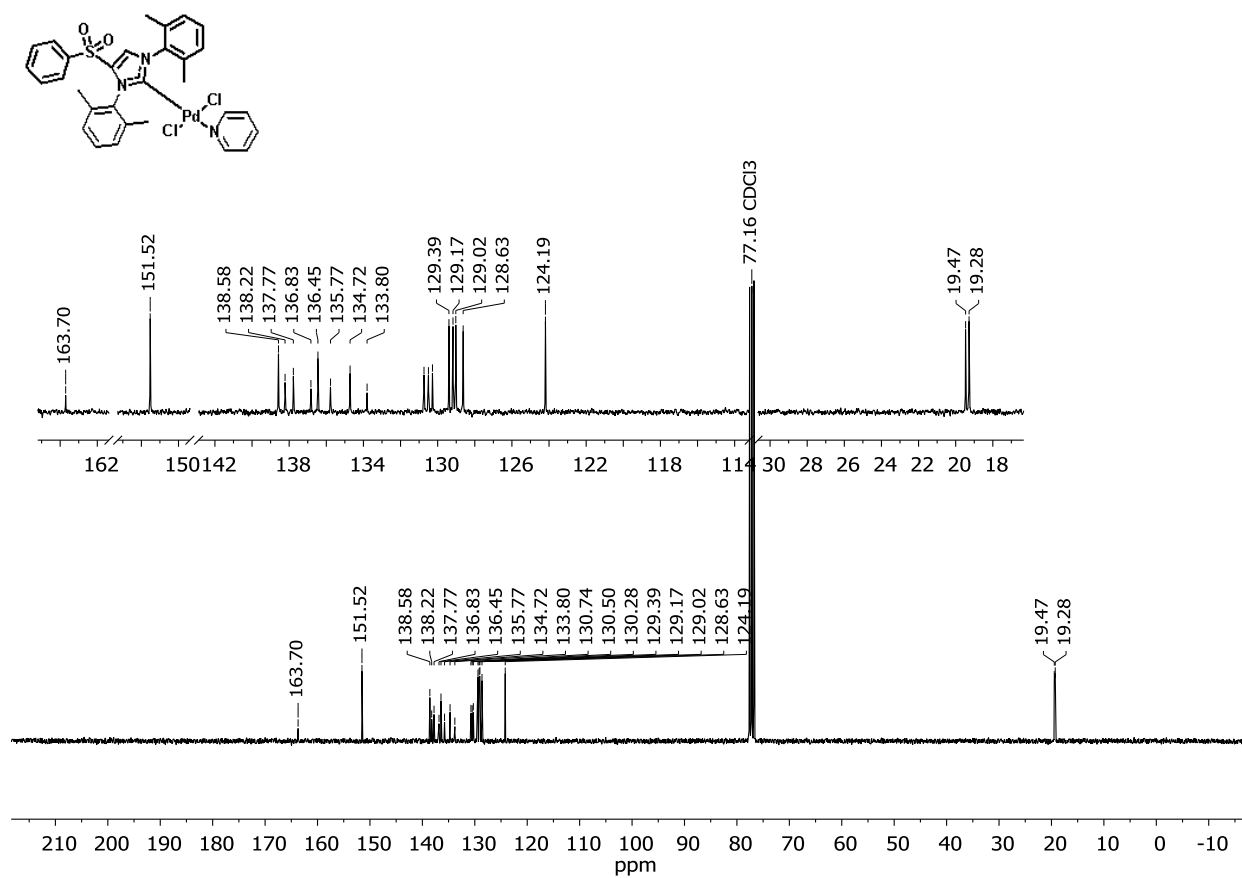

**Figure S40.**  $^{13}\text{C}$  NMR spectrum of **3c** (CDCl<sub>3</sub>, 75 MHz)

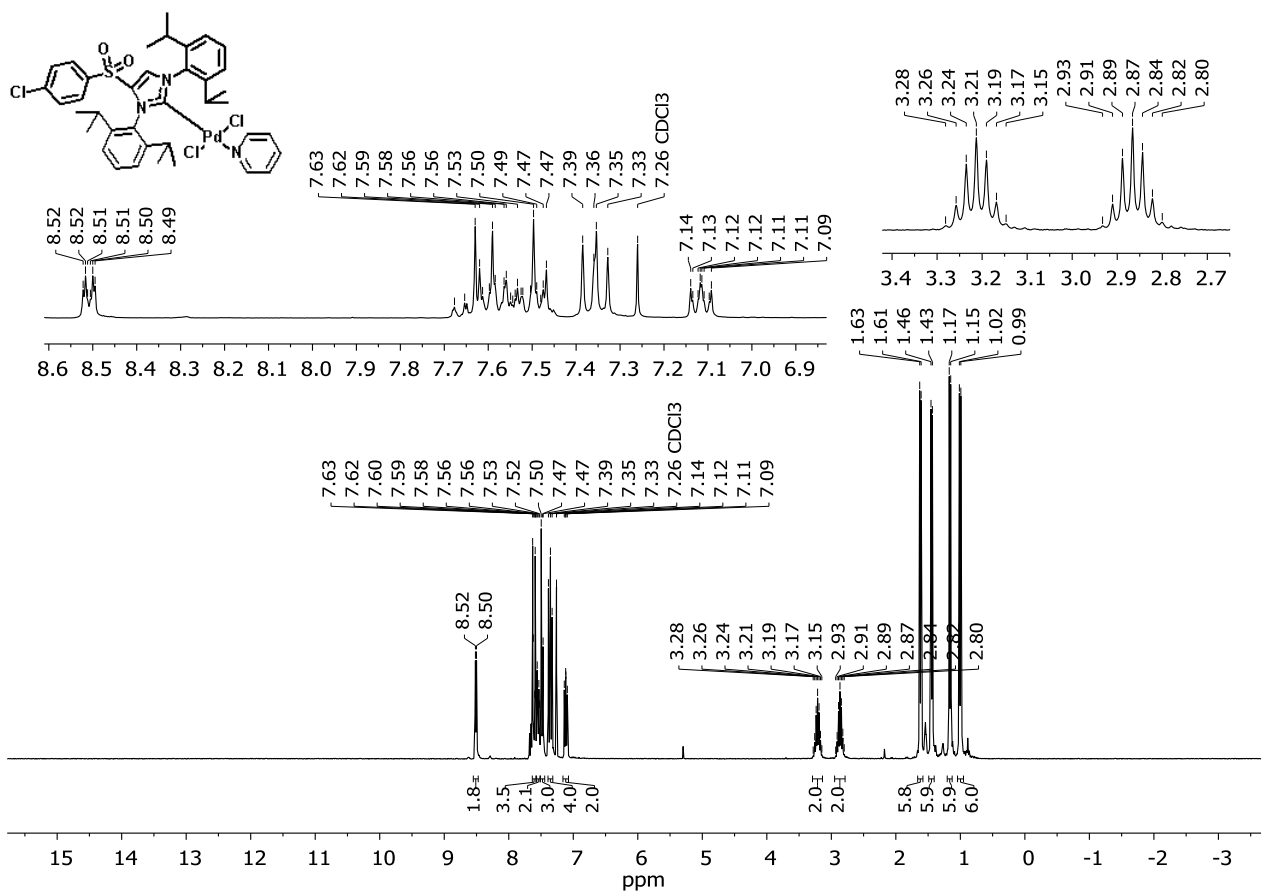

**Figure S41.**  $^1\text{H}$  NMR spectrum of **3d** ( $\text{CDCl}_3$ , 300 MHz)

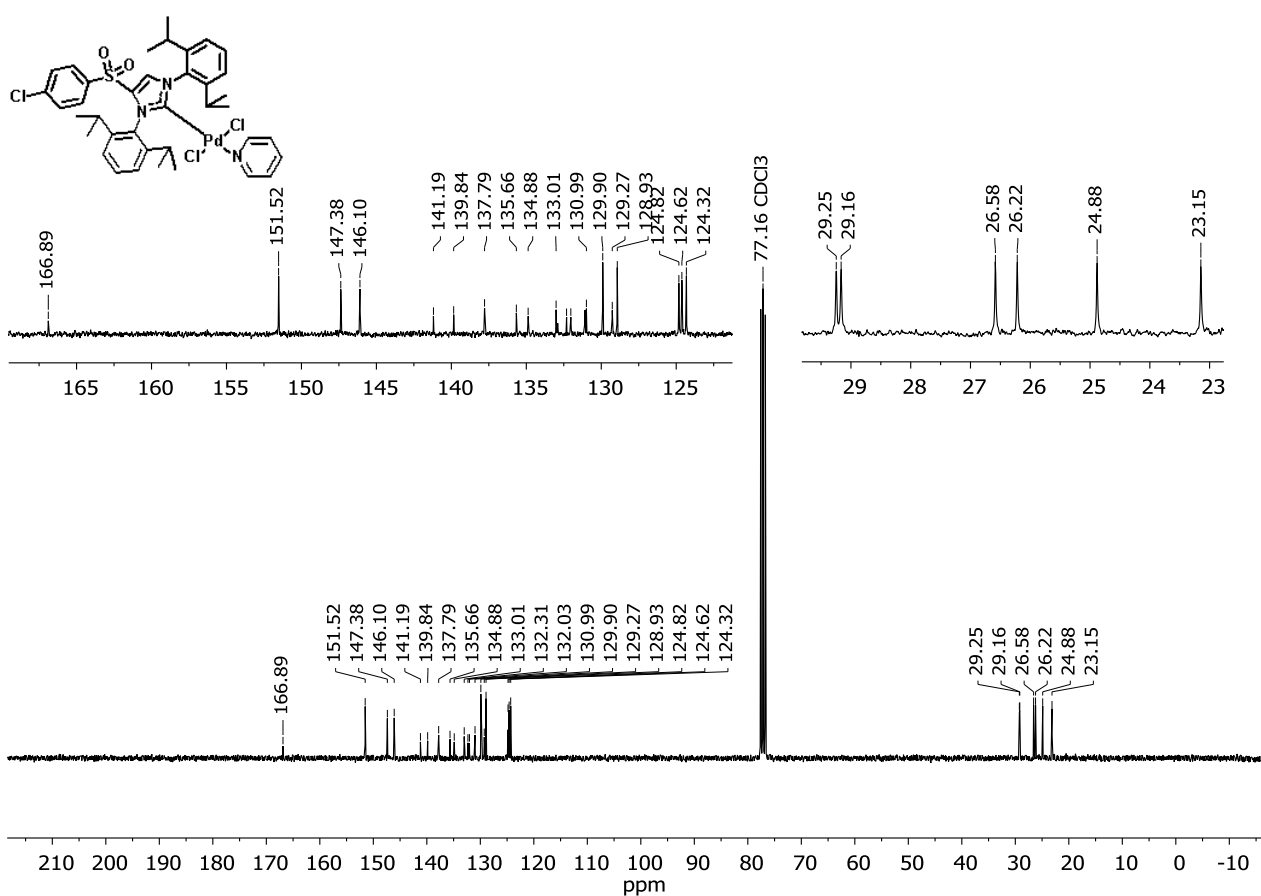

**Figure S42.**  $^{13}\text{C}$  NMR spectrum of **3d** ( $\text{CDCl}_3$ , 75 MHz)

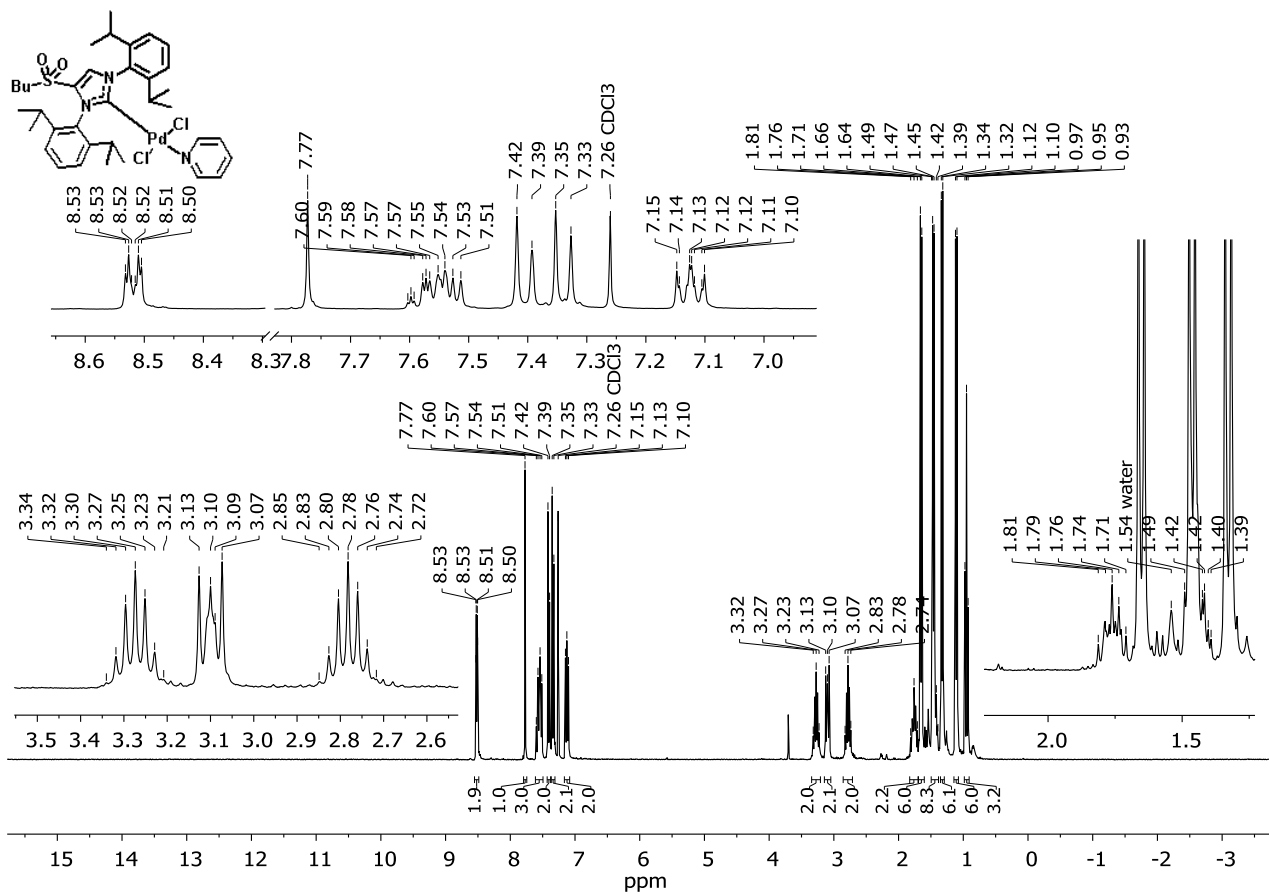

**Figure S43.**  $^1\text{H}$  NMR spectrum of **3e** ( $\text{CDCl}_3$ , 300 MHz)

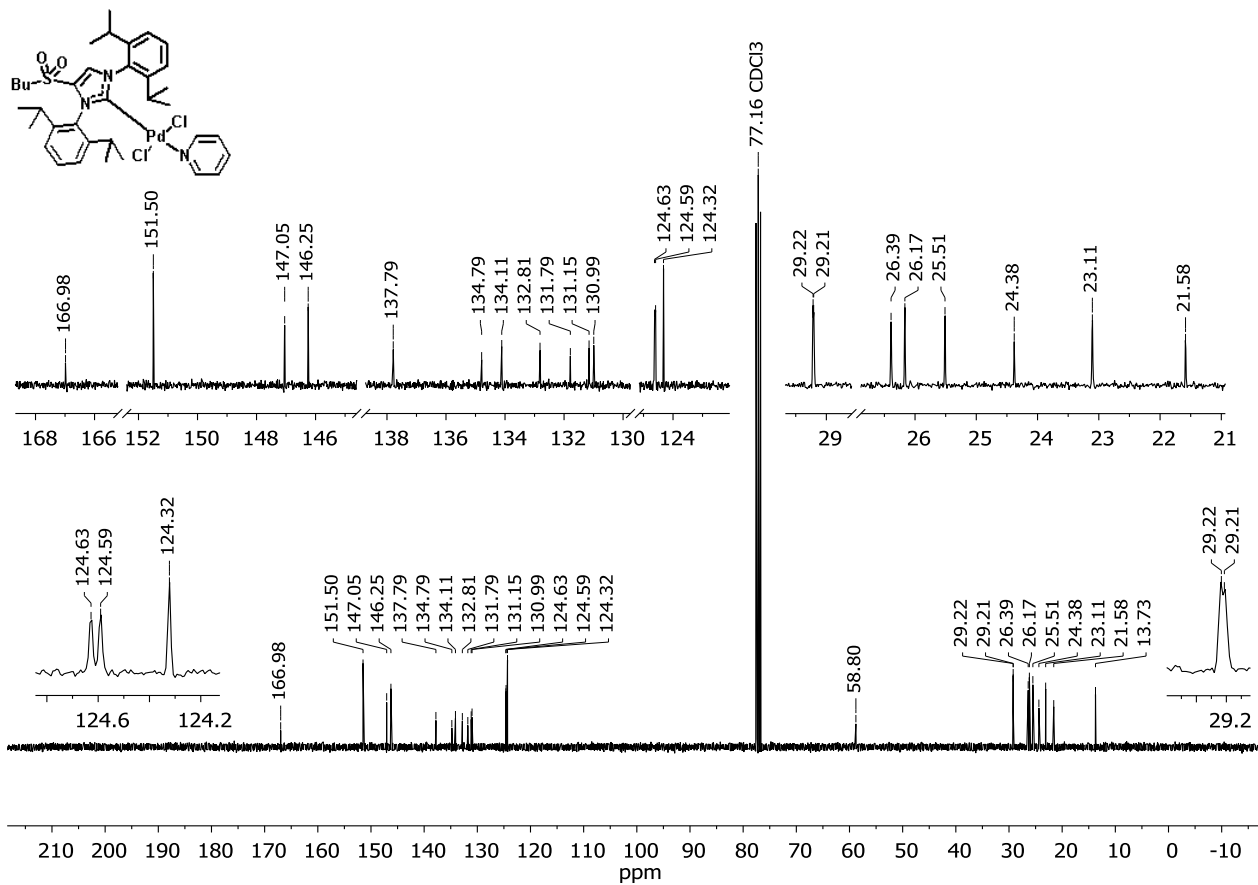

**Figure S44.**  $^{13}\text{C}$  NMR spectrum of **3e** ( $\text{CDCl}_3$ , 75 MHz)

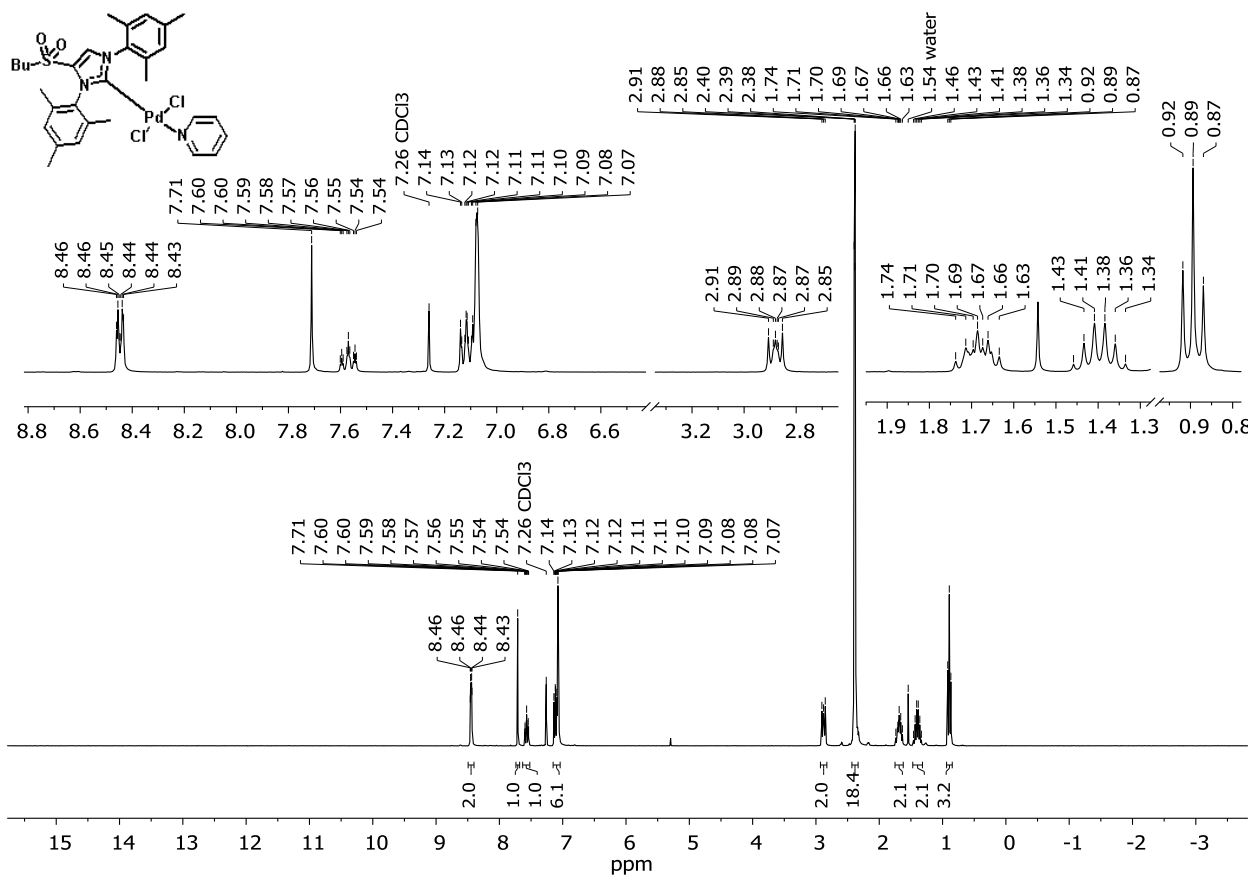

**Figure S45.**  $^1\text{H}$  NMR spectrum of **3f** ( $\text{CDCl}_3$ , 300 MHz)

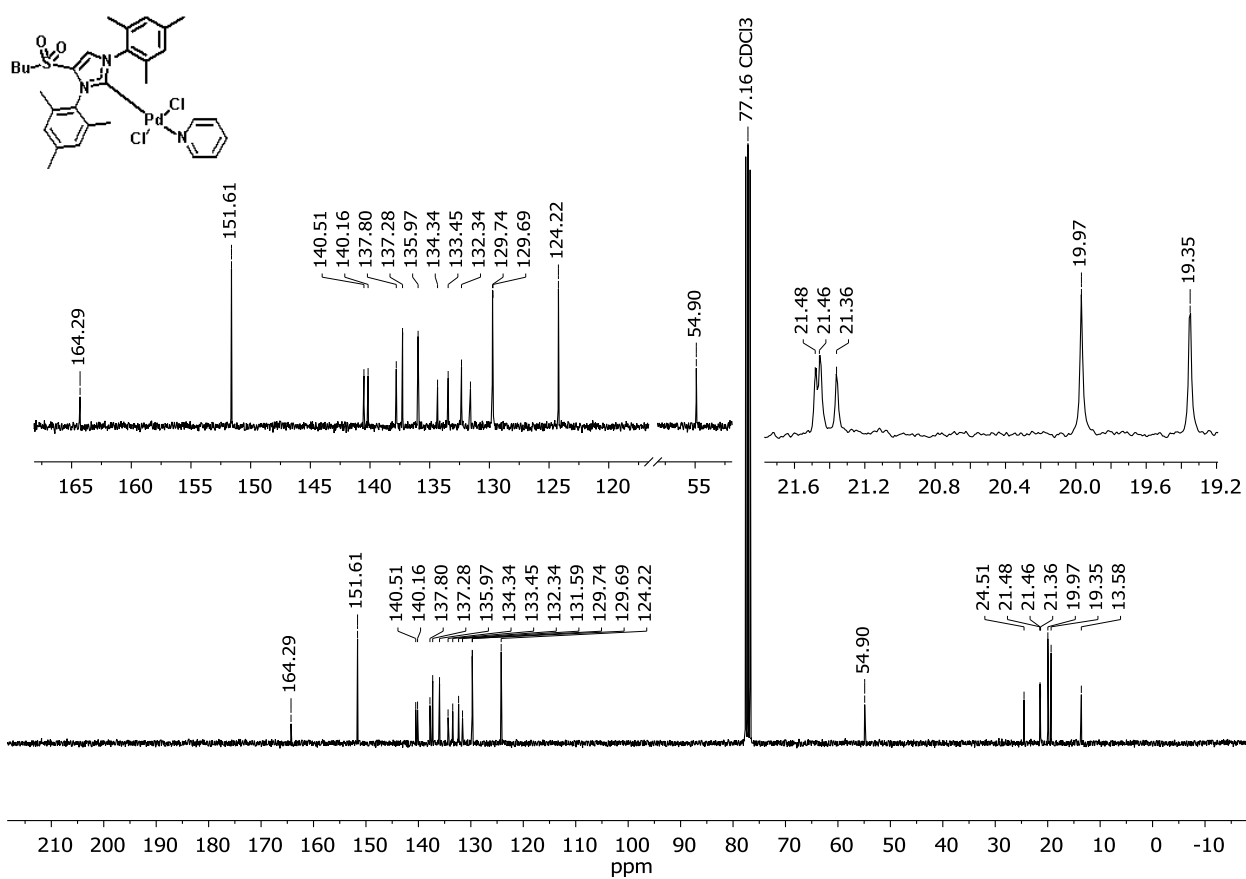

**Figure S46.**  $^{13}\text{C}$  NMR spectrum of **3f** ( $\text{CDCl}_3$ , 75 MHz)

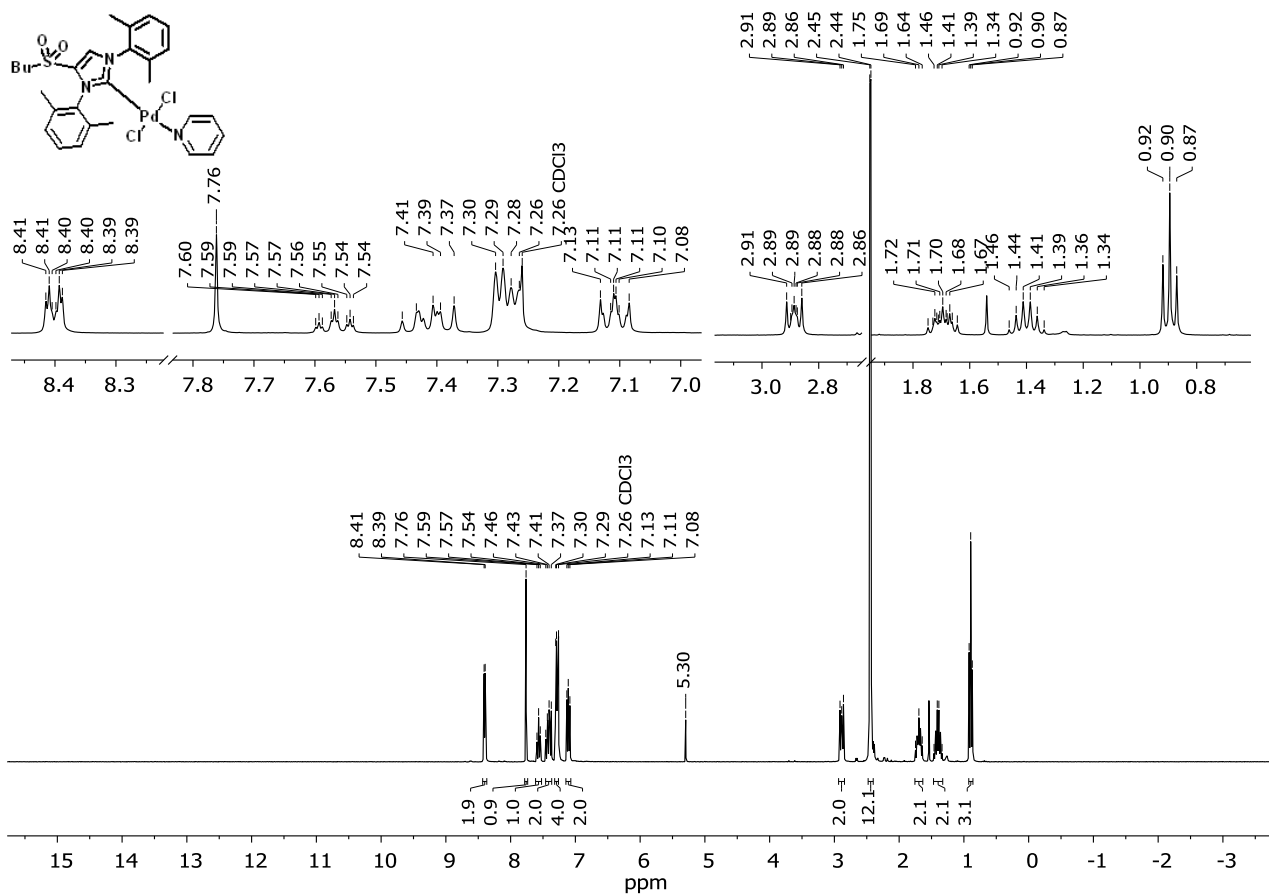

**Figure S47.**  $^1\text{H}$  NMR spectrum of **3g** ( $\text{CDCl}_3$ , 300 MHz)

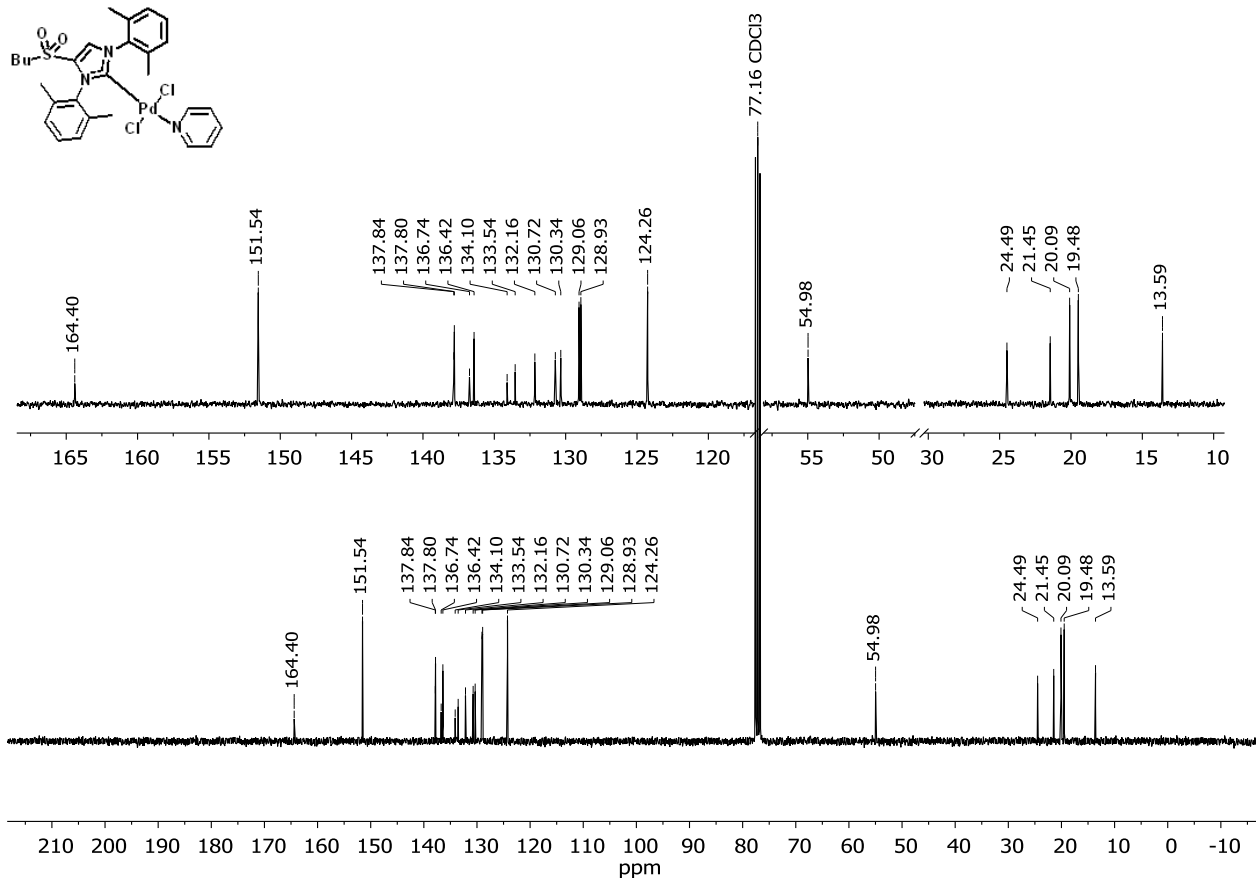

**Figure S48.**  $^{13}\text{C}$  NMR spectrum of **3g** ( $\text{CDCl}_3$ , 75 MHz)

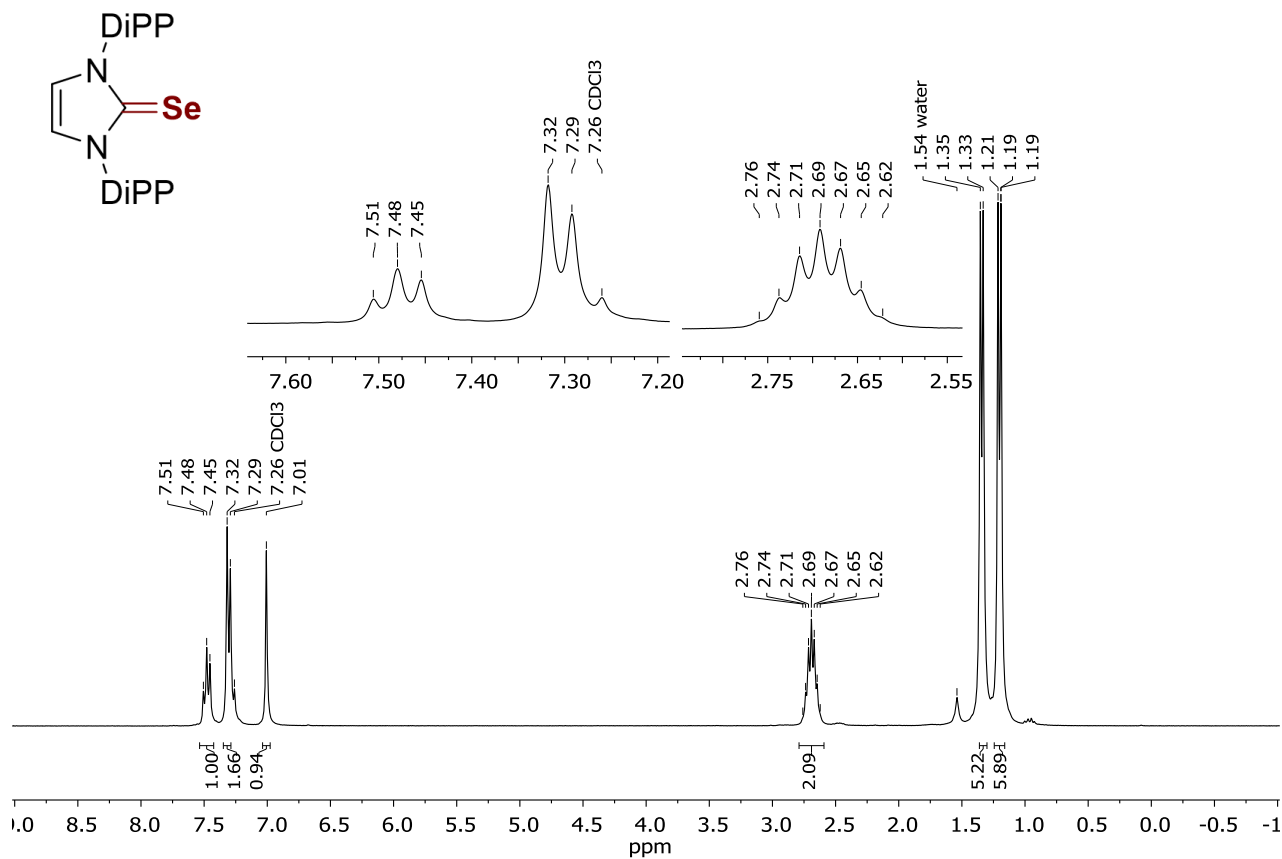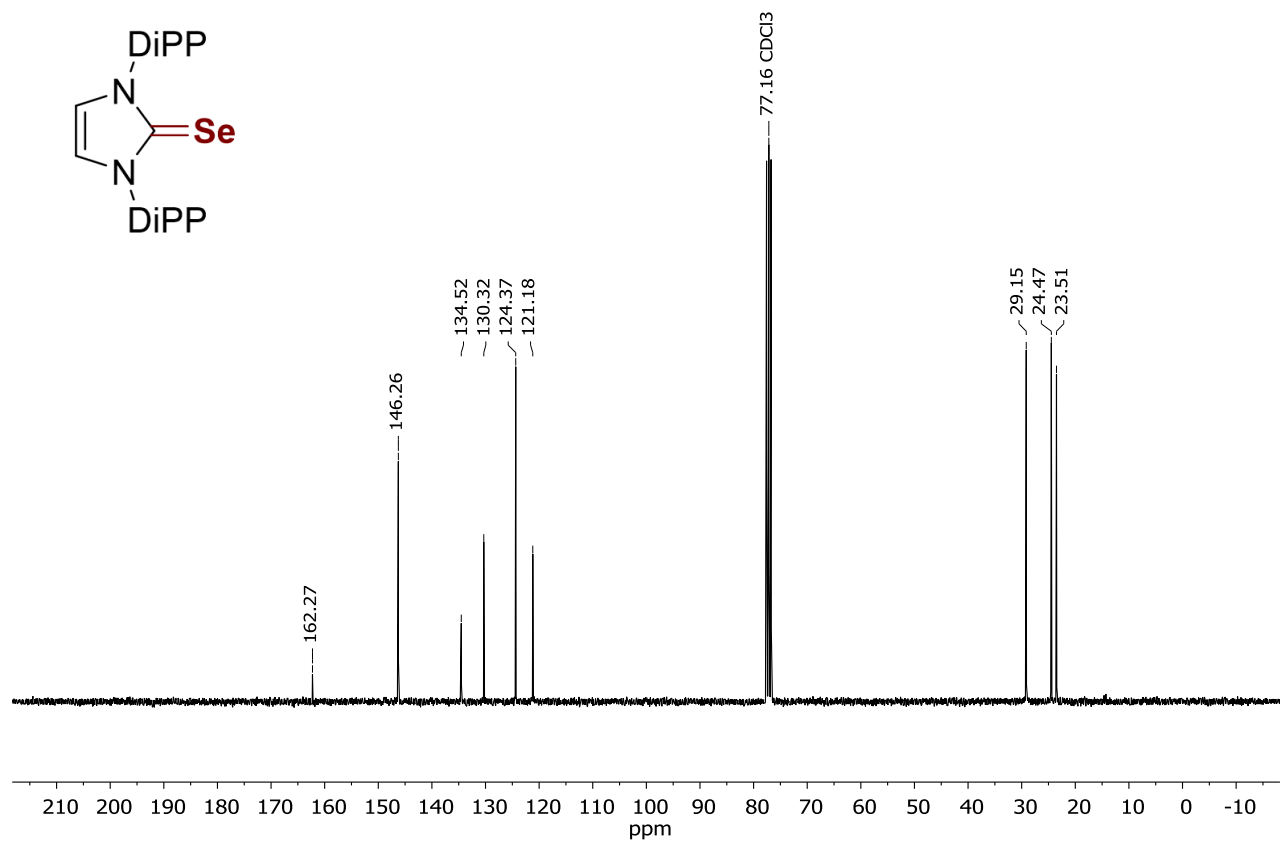

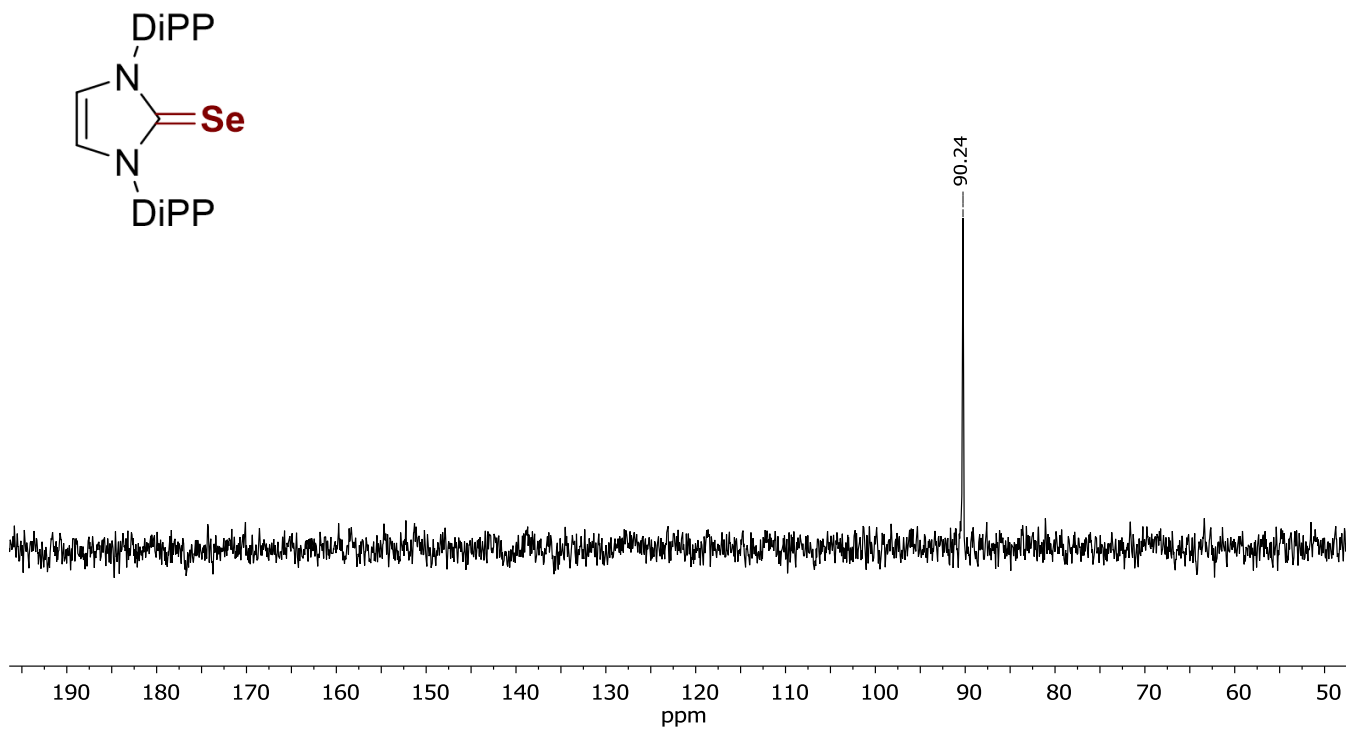

**Figure S51.**  $^{77}\text{Se}$  NMR spectrum of **8a** ( $\text{CDCl}_3$ , 57 MHz)

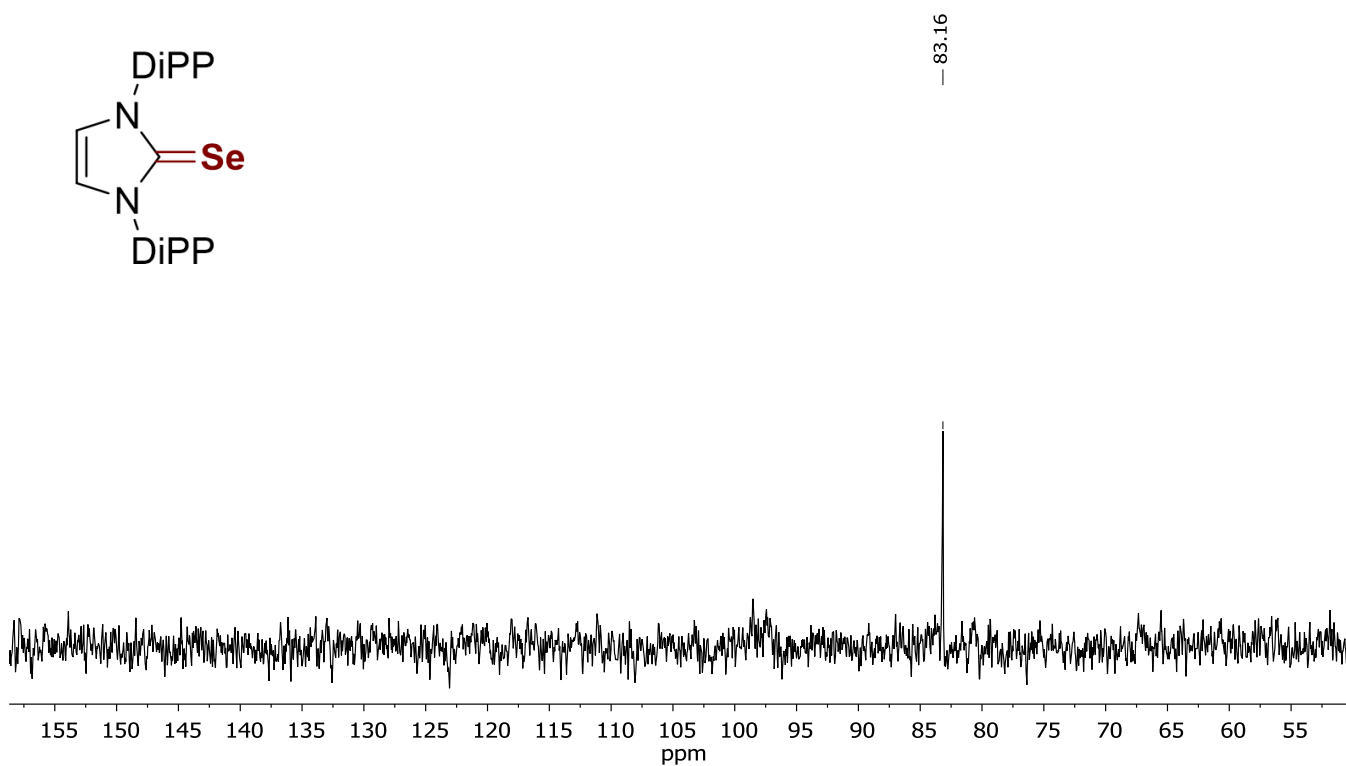

**Figure S52.**  $^{77}\text{Se}$  NMR spectrum of **8a** ( $\text{DMSO-}d_6$ , 57 MHz)



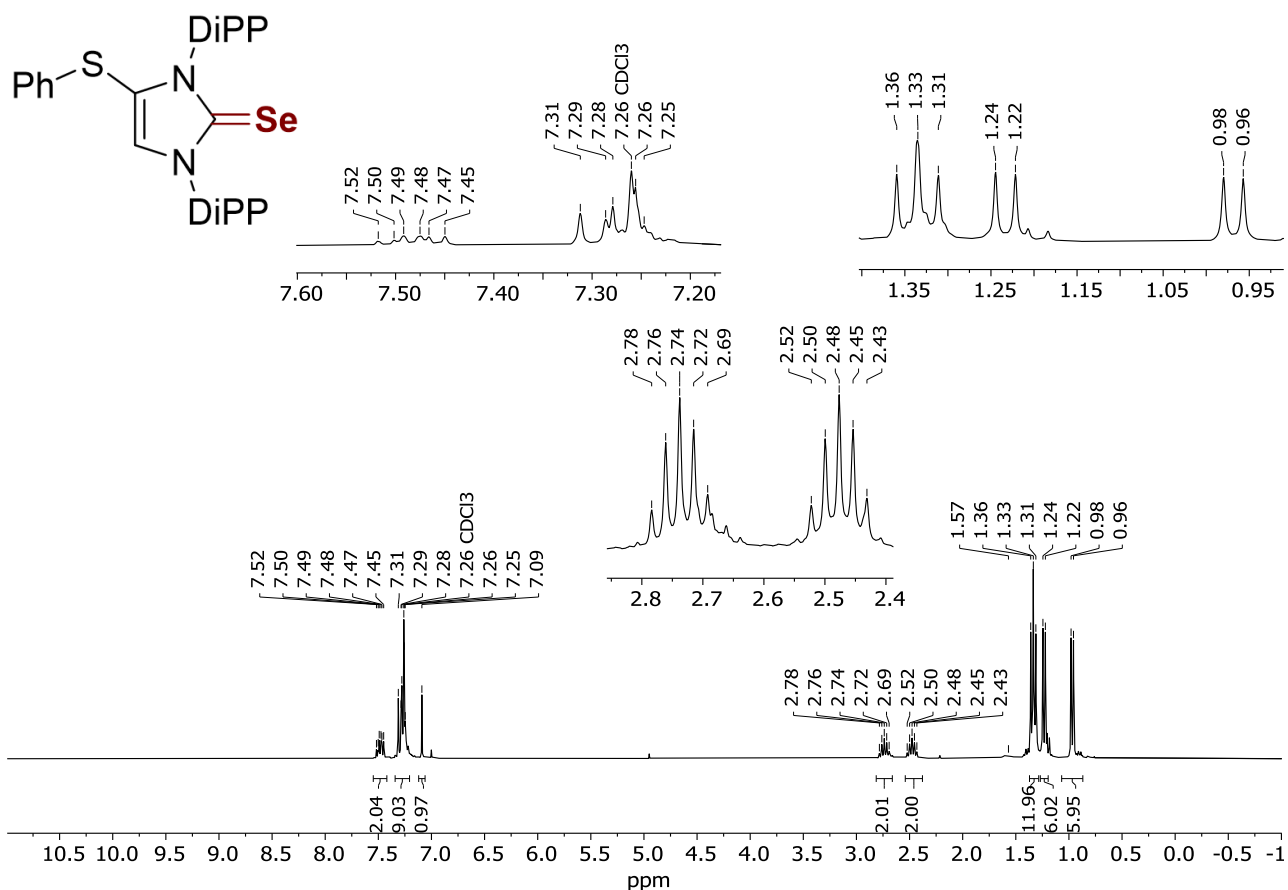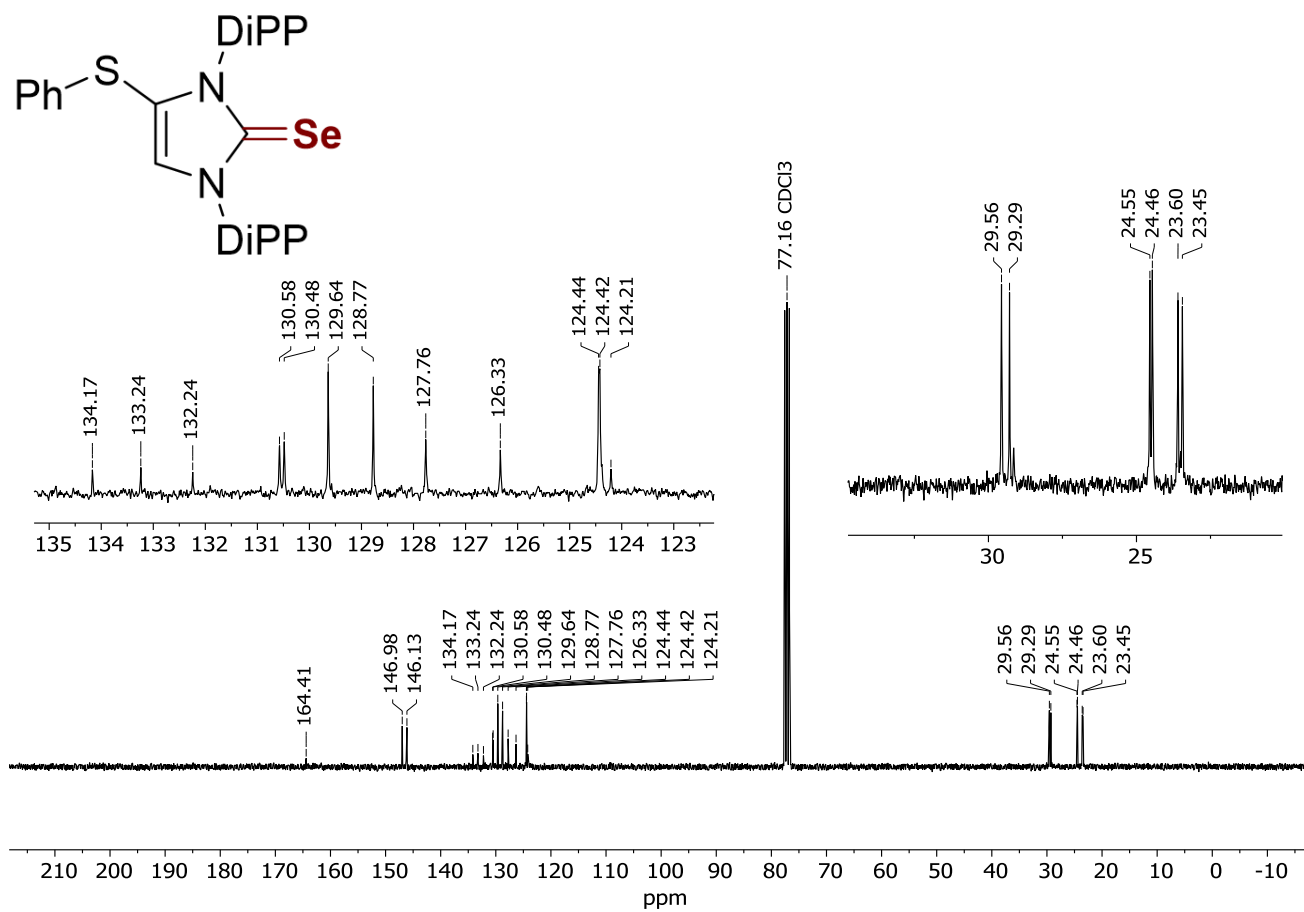

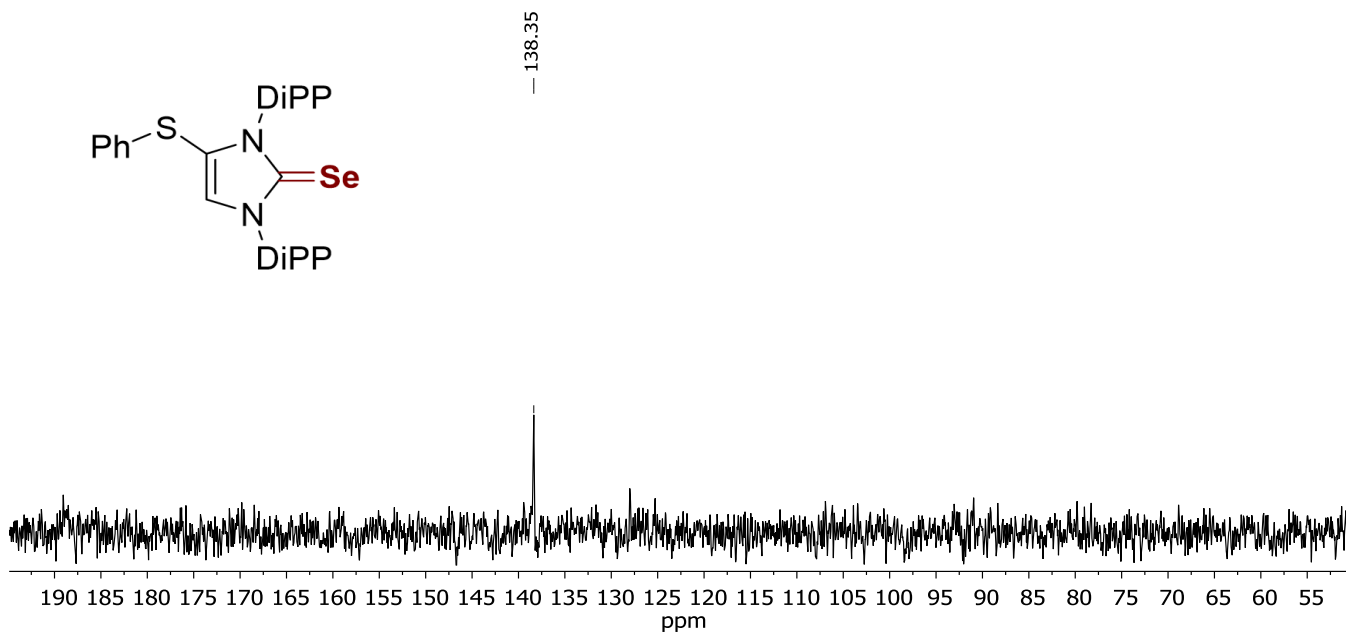

**Figure S55.** <sup>77</sup>Se NMR spectrum of **8b** (CDCl<sub>3</sub>, 57 MHz)

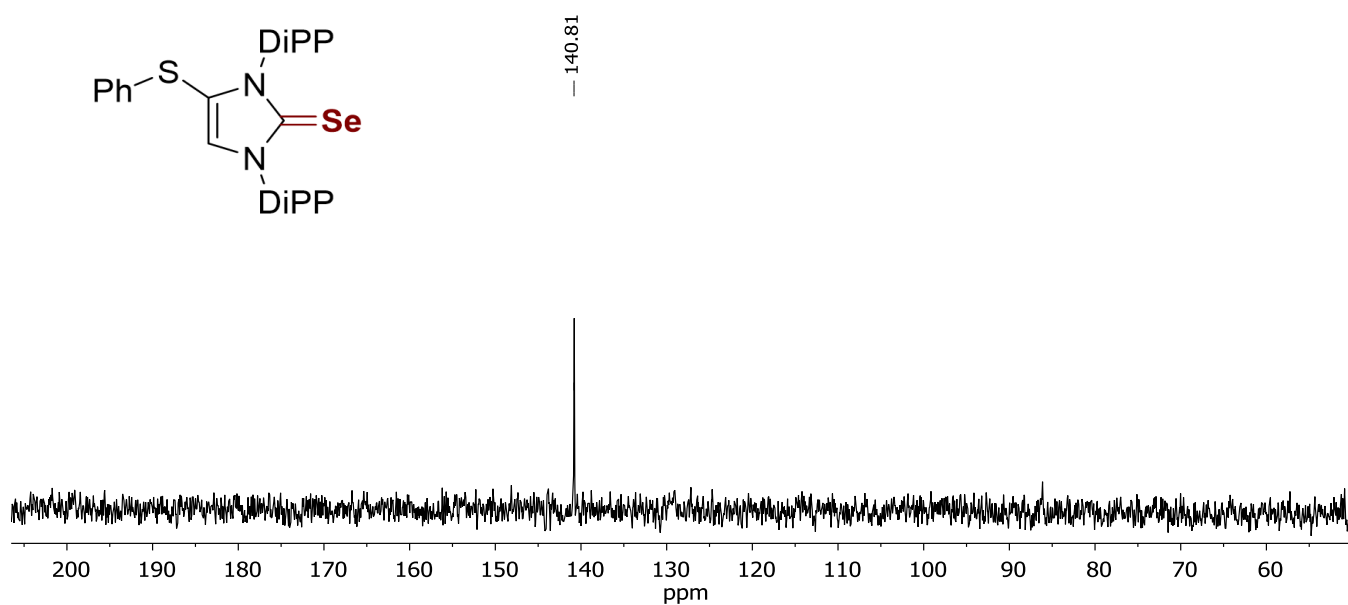

**Figure S56.** <sup>77</sup>Se NMR spectrum of **8b** (DMSO-*d*<sub>6</sub>, 57 MHz)

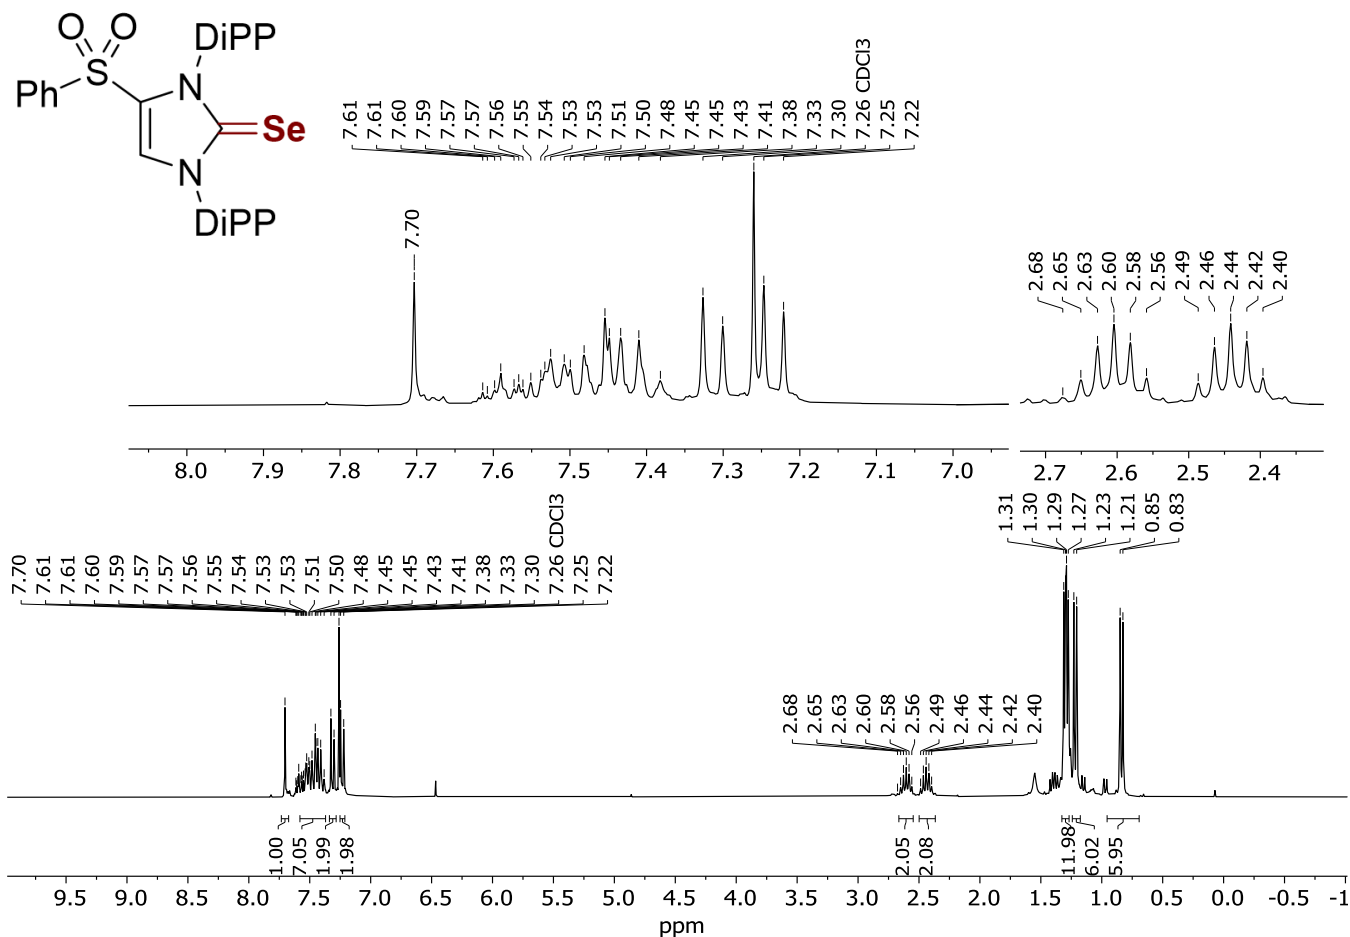

**Figure S57.**  $^1\text{H}$  NMR spectrum of **8c** ( $\text{CDCl}_3$ , 300 MHz)

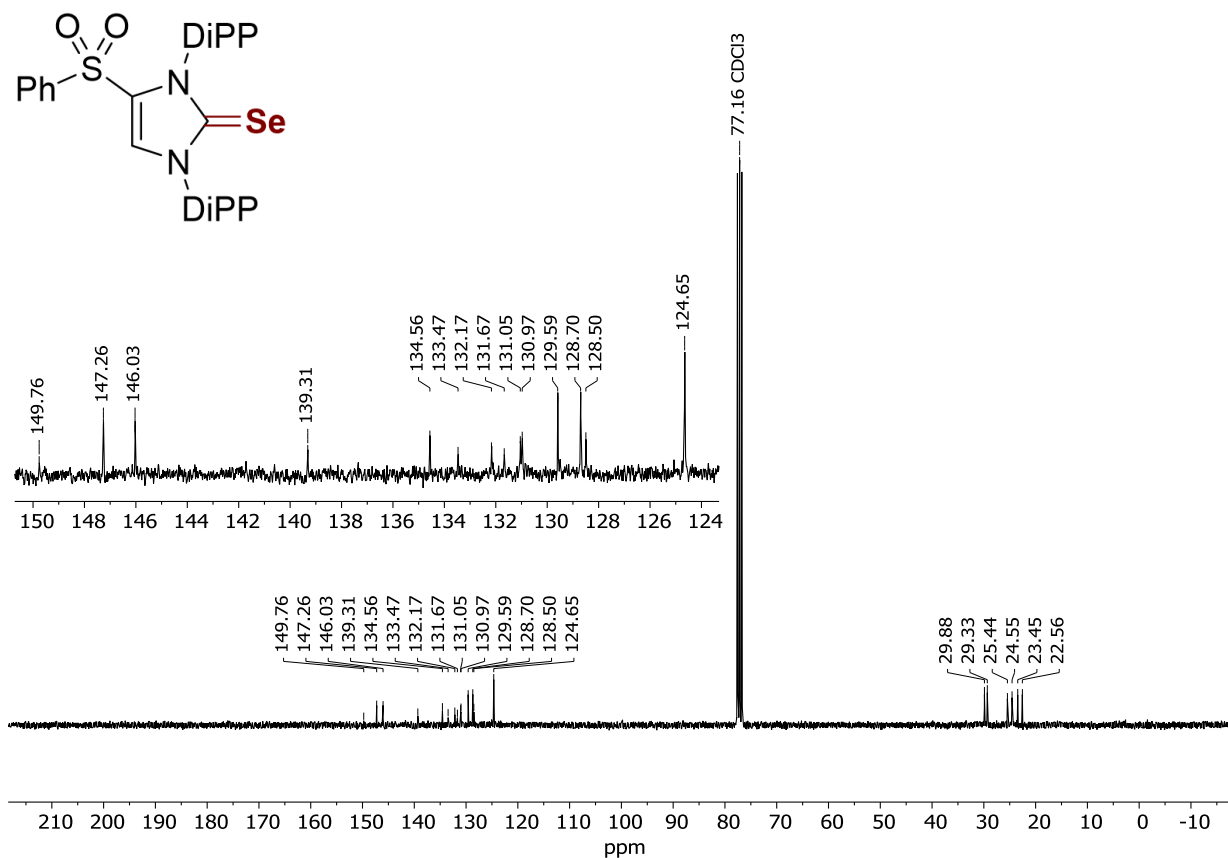

**Figure S58.**  $^{13}\text{C}$  NMR spectrum of **8c** ( $\text{CDCl}_3$ , 75 MHz)

— 179.32

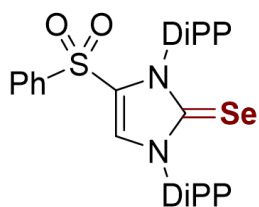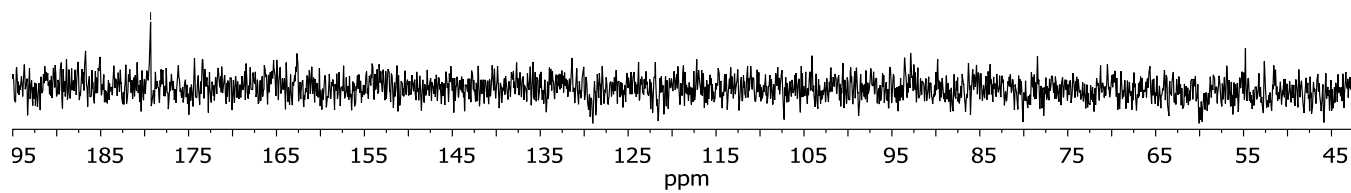

**Figure S59.** <sup>77</sup>Se NMR spectrum of **8c** (CDCl<sub>3</sub>, 57 MHz)

— 199.77

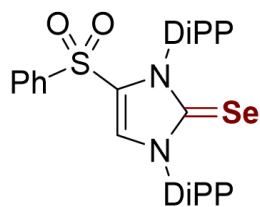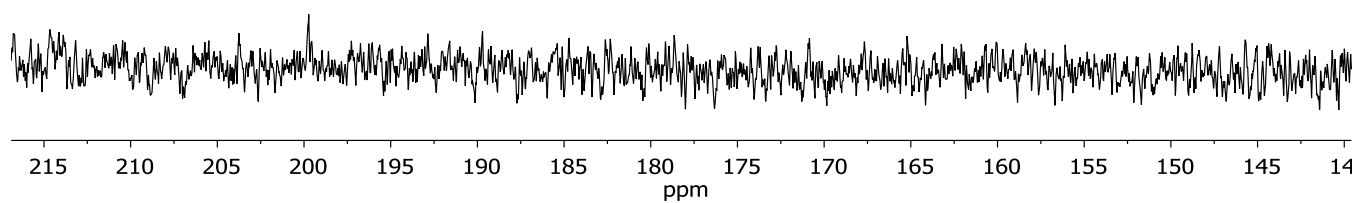

**Figure S60.** <sup>77</sup>Se NMR spectrum of **8c** (DMSO-*d*<sub>6</sub>, 57 MHz)

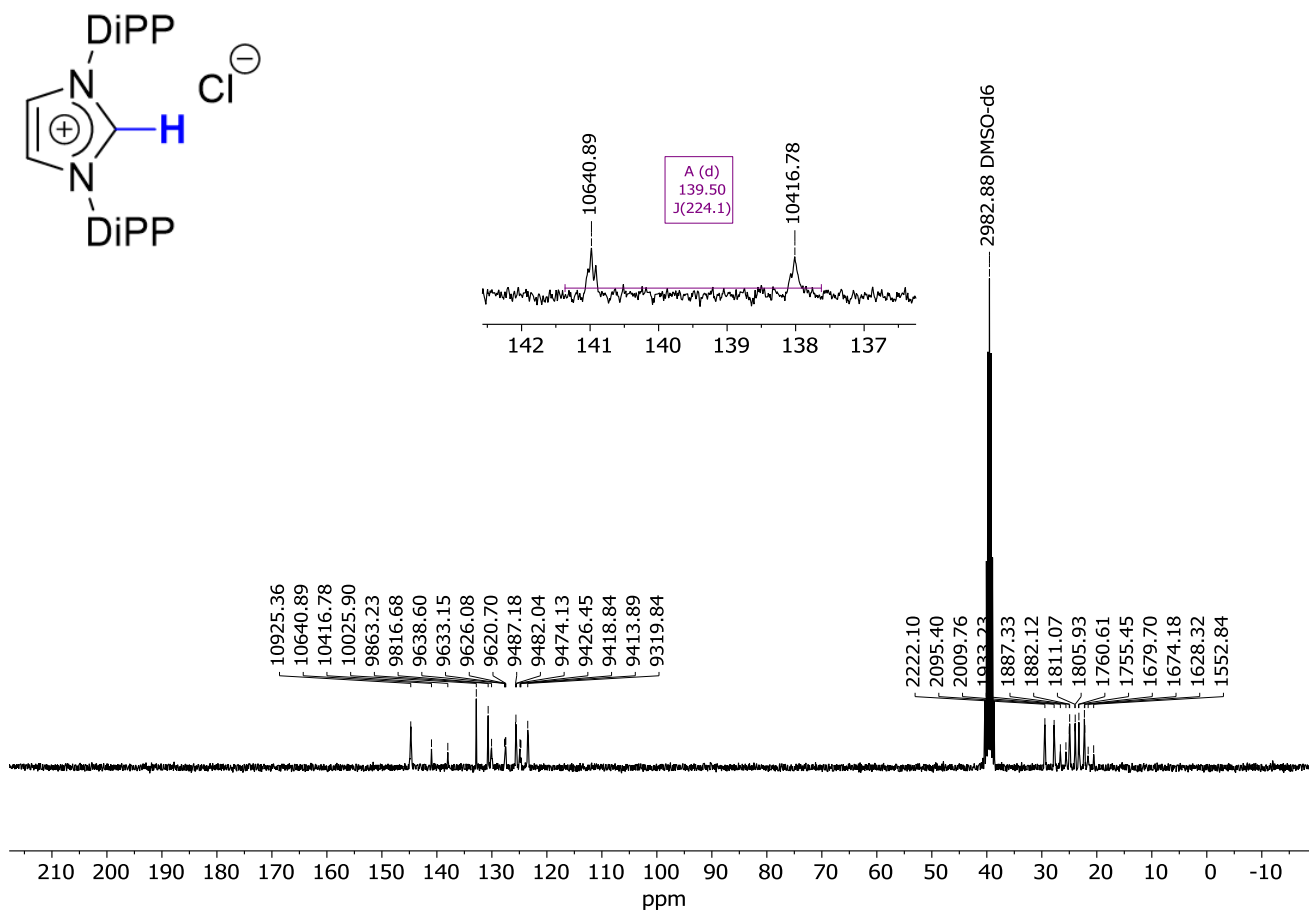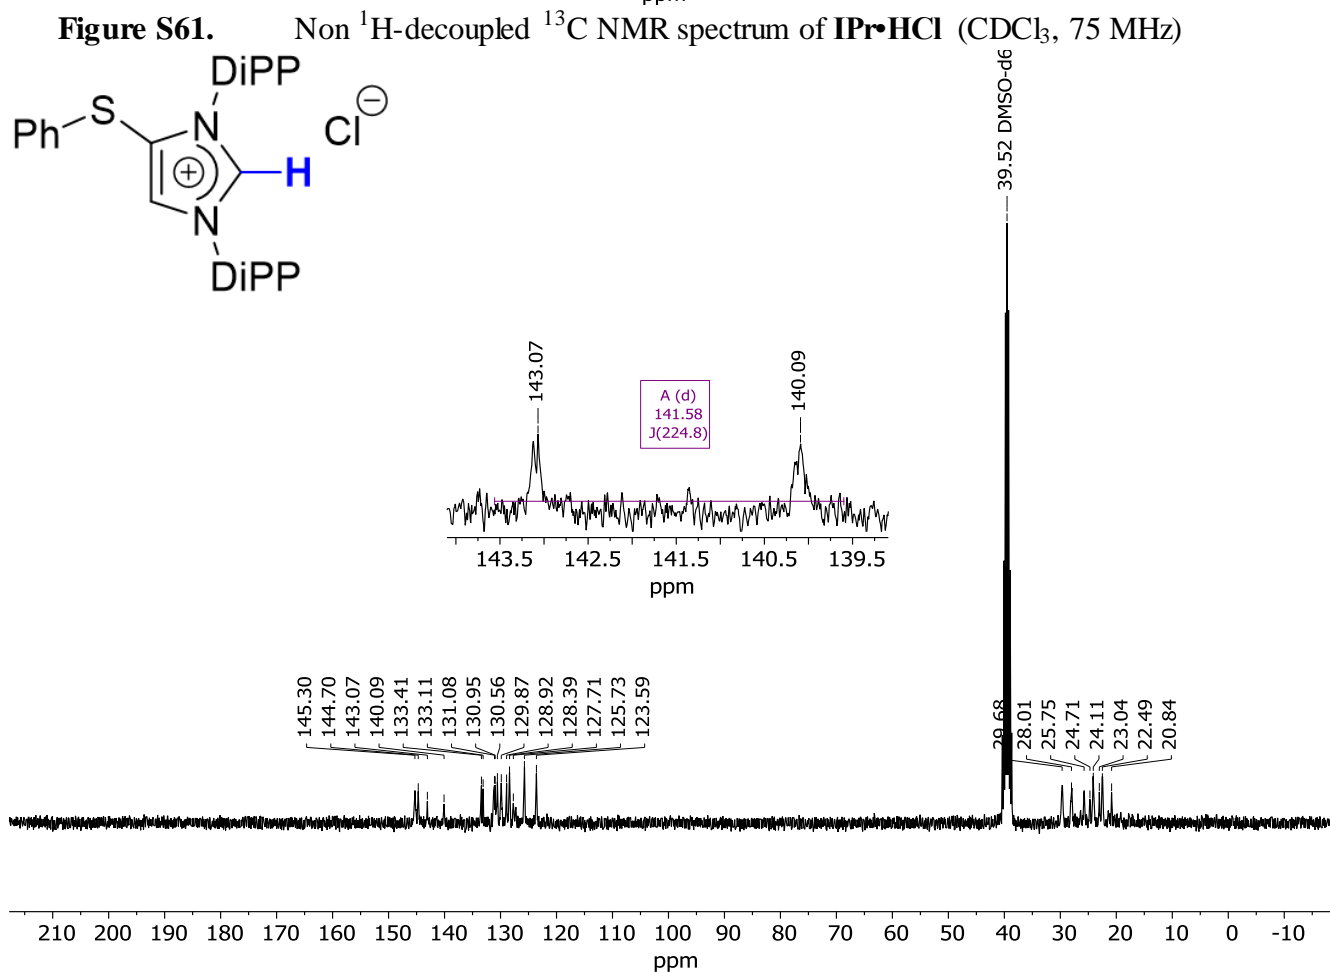

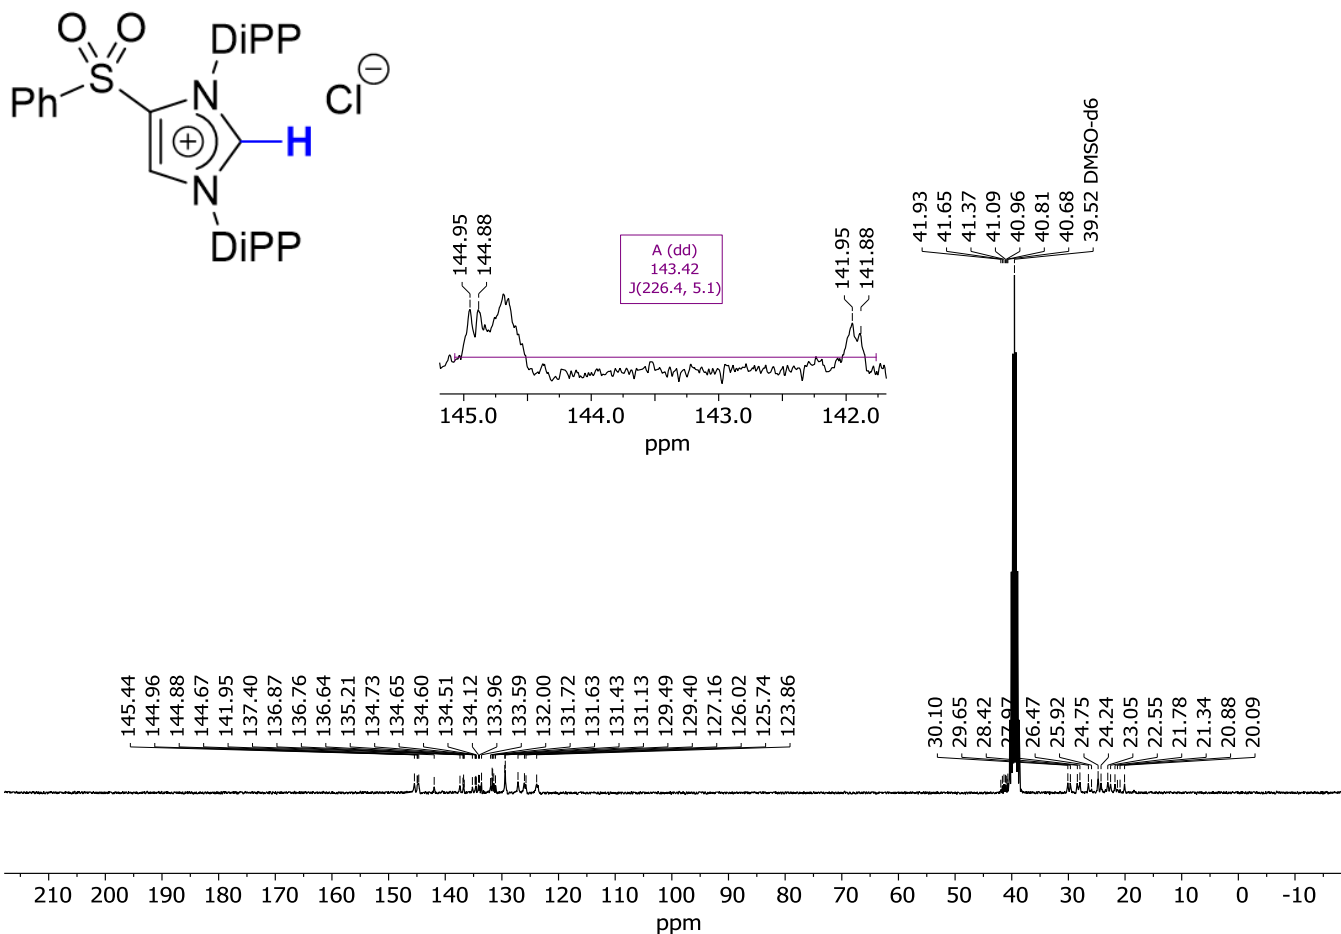

**Figure S63.** Non <sup>1</sup>H decoupled <sup>13</sup>C NMR spectrum of **2b** (CDCl<sub>3</sub>, 75 MHz)

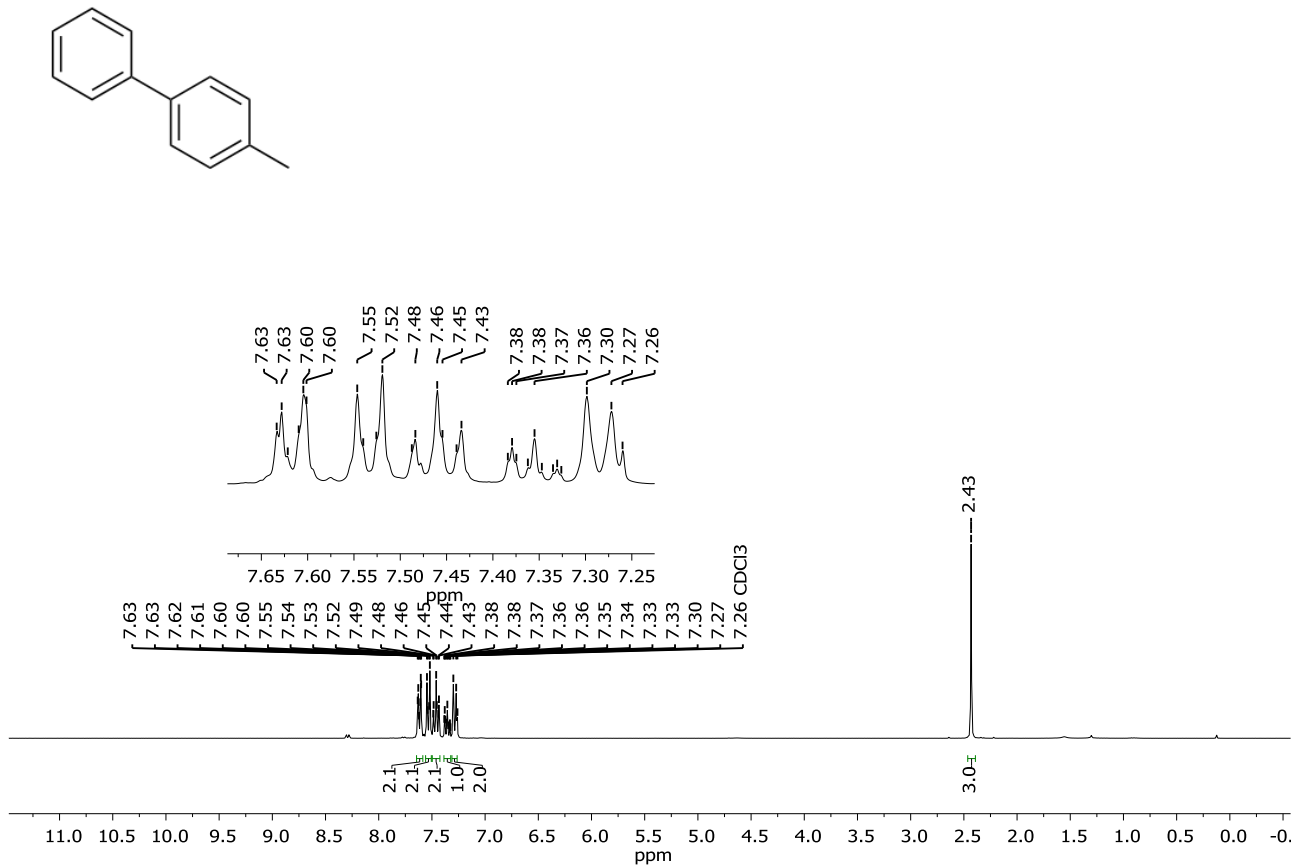

**Figure S64.** <sup>1</sup>H NMR spectrum of **12** (CDCl<sub>3</sub>, 300 MHz)

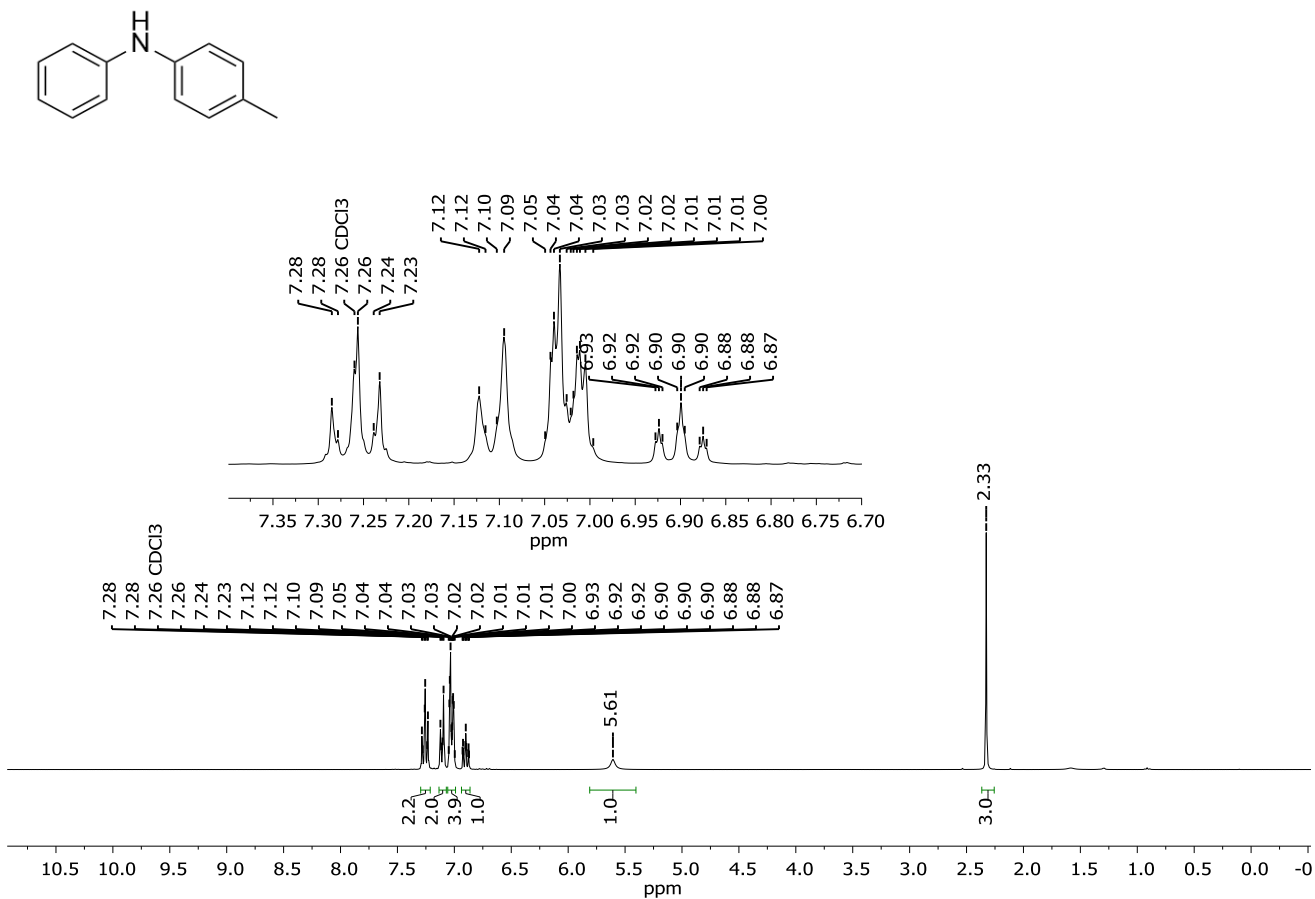

**Figure S65.** <sup>1</sup>H NMR spectrum of **14** (CDCl<sub>3</sub>, 300 MHz)

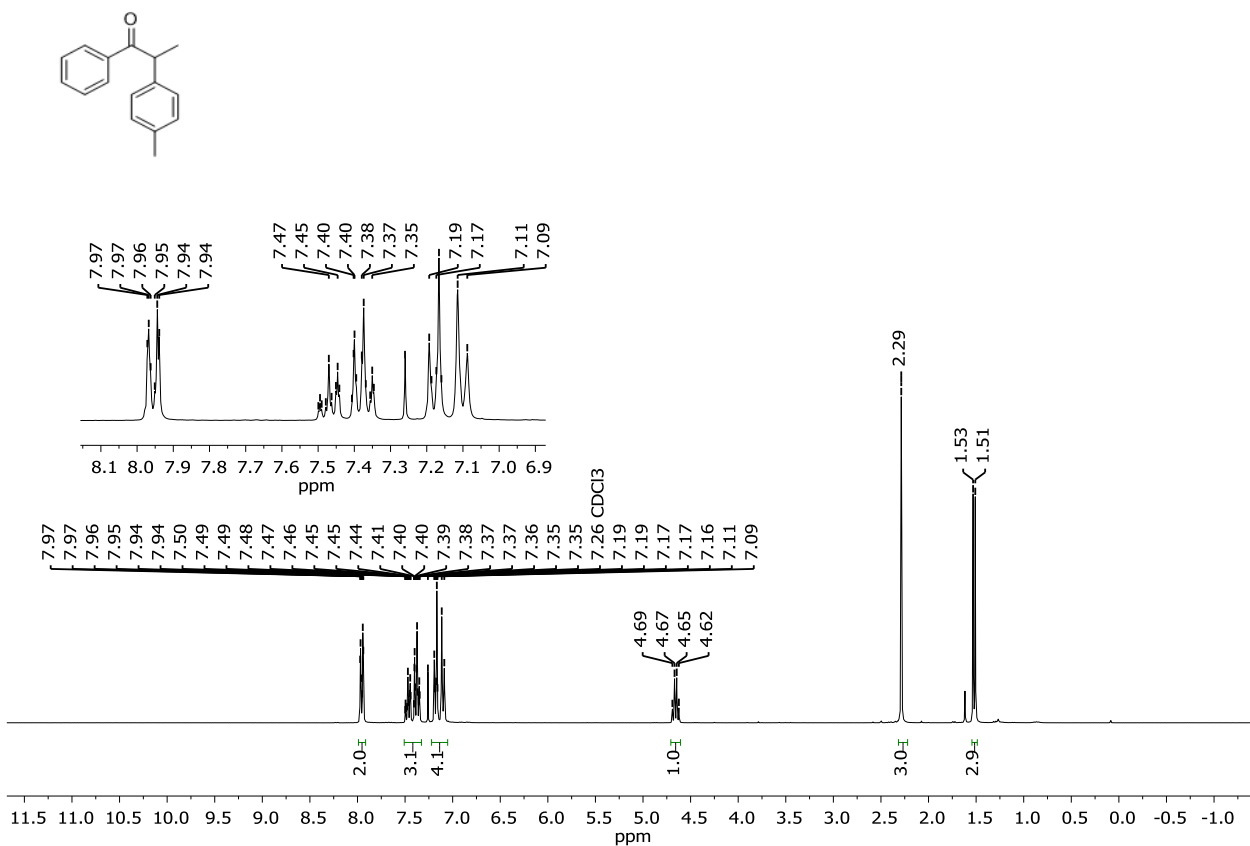

**Figure S66.** <sup>1</sup>H NMR spectrum of **17** (CDCl<sub>3</sub>, 300 MHz)

## S5. Cartesian coordinates of DFT optimized structures

Coordinates of the optimized structure of IPr

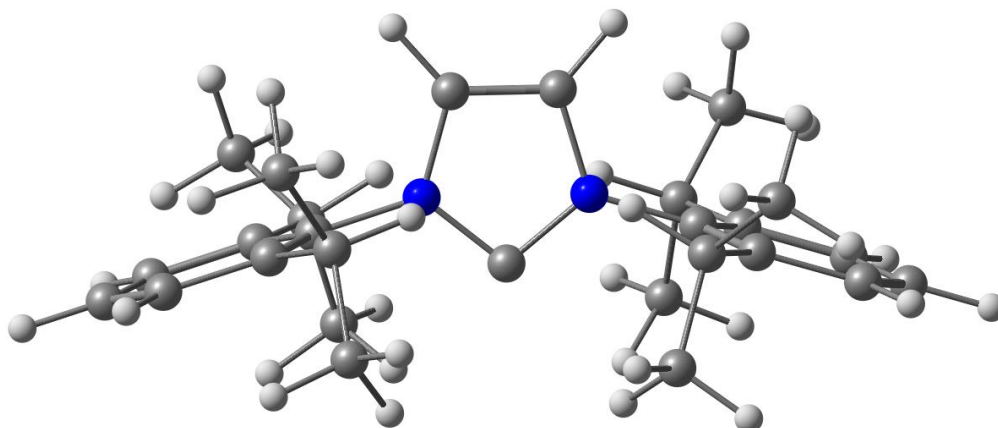

65

IPr E = -1159.0377755

|   |            |            |            |
|---|------------|------------|------------|
| C | 0.6773420  | -0.0337000 | 1.8510090  |
| C | -0.6771940 | 0.0327890  | 1.8510970  |
| N | 1.0583110  | -0.0526600 | 0.5172580  |
| N | -1.0583020 | 0.0524340  | 0.5174000  |
| C | -0.0000410 | 0.0001120  | -0.3410620 |
| C | 2.4233310  | -0.1123410 | 0.0927650  |
| C | -2.4233480 | 0.1123130  | 0.0930290  |
| C | -3.0101390 | 1.3717990  | -0.1352640 |
| C | -4.3475810 | 1.4034410  | -0.5432560 |
| C | -5.0750100 | 0.2290370  | -0.7123130 |
| C | -4.4740520 | -1.0029290 | -0.4782920 |
| C | -3.1378500 | -1.0885040 | -0.0712120 |
| C | -2.4989720 | -2.4467660 | 0.1528580  |
| C | -2.2155290 | 2.6581270  | -0.0037930 |
| C | 3.1376390  | 1.0885660  | -0.0715890 |
| C | 4.4738420  | 1.0031660  | -0.4787210 |
| C | 5.0749950  | -0.2287230 | -0.7126160 |
| C | 4.3477580  | -1.4032330 | -0.5434310 |
| C | 3.0103120  | -1.3717630 | -0.1354590 |
| C | 2.2158060  | -2.6581610 | -0.0040580 |
| C | 2.4986020  | 2.4467490  | 0.1525010  |
| H | -4.8286500 | 2.3653260  | -0.7352420 |
| H | -5.0529560 | -1.9197220 | -0.6173030 |
| H | -1.4738810 | -2.2750290 | 0.5131210  |
| C | -3.2330770 | -3.2527930 | 1.2251990  |
| C | -2.3903590 | -3.2239530 | -1.1606990 |
| H | -1.3080120 | 2.4266330  | 0.5747180  |
| H | 5.0525950  | 1.9200390  | -0.6178270 |
| H | 4.8289820  | -2.3650560 | -0.7353270 |
| H | 1.3084770  | -2.4268700 | 0.5748350  |
| C | 1.7624270  | -3.1417940 | -1.3844970 |
| C | 2.9711950  | -3.7503130 | 0.7515340  |
| H | 1.4735460  | 2.2748810  | 0.5128000  |



|   |            |            |            |
|---|------------|------------|------------|
| H | -1.3922880 | 0.0665930  | 2.6692150  |
| H | 1.3925260  | -0.0678900 | 2.6690320  |
| H | -6.1193610 | 0.2753320  | -1.0313890 |
| H | 6.1193520  | -0.2748840 | -1.0316930 |
| C | -2.9706710 | 3.7500320  | 0.7524190  |
| C | -1.7625850 | 3.1421680  | -1.3842200 |
| C | 3.2326550  | 3.2528570  | 1.2248190  |
| C | 2.3898510  | 3.2239360  | -1.1610440 |
| H | -2.7173190 | -4.2085750 | 1.4082190  |
| H | -3.2800930 | -2.7046440 | 2.1787360  |
| H | -4.2658690 | -3.4881260 | 0.9223150  |
| H | -1.8745950 | -4.1839970 | -1.0000640 |
| H | -3.3843710 | -3.4450390 | -1.5819380 |
| H | -1.8235540 | -2.6532160 | -1.9113350 |
| H | 1.1430300  | -4.0486390 | -1.2950890 |
| H | 1.1691610  | -2.3683810 | -1.8946590 |
| H | 2.6292040  | -3.3848000 | -2.0204780 |
| H | 2.3194200  | -4.6241370 | 0.9063580  |
| H | 3.8554120  | -4.1009040 | 0.1961620  |
| H | 3.3100650  | -3.4000290 | 1.7385940  |
| H | -2.3189020 | 4.6238700  | 0.9071940  |
| H | -3.8551690 | 4.1006810  | 0.1975320  |
| H | -3.3090720 | 3.3994460  | 1.7395320  |
| H | -1.1432090 | 4.0490190  | -1.2947410 |
| H | -1.1694100 | 2.3689150  | -1.8947320 |
| H | -2.6295340 | 3.3853040  | -2.0199180 |
| H | 2.7167890  | 4.2085750  | 1.4078640  |
| H | 3.2797740  | 2.7047080  | 2.1783520  |
| H | 4.2654060  | 3.4883150  | 0.9218950  |
| H | 1.8739900  | 4.1839220  | -1.0003800 |
| H | 3.3838230  | 3.4451350  | -1.5823180 |
| H | 1.8230790  | 2.6531450  | -1.9116620 |

Coordinates of the optimized structure of **9a**

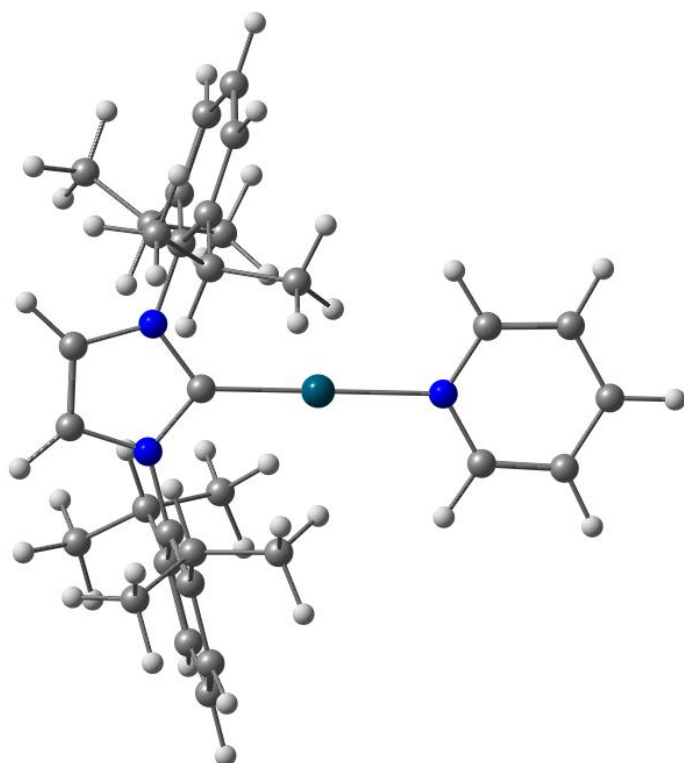

77

**9a** E=-1535.0941195

|    |            |            |            |
|----|------------|------------|------------|
| Pd | -0.0033470 | 1.1668640  | -0.0974120 |
| N  | -0.0030420 | 3.2613030  | -0.2438670 |
| C  | 1.1489360  | 3.9506720  | -0.2838280 |
| C  | -1.1533910 | 3.9526570  | -0.2945500 |
| C  | 1.1957000  | 5.3379630  | -0.3740000 |
| C  | -1.1969450 | 5.3400330  | -0.3851350 |
| C  | 0.0001970  | 6.0510030  | -0.4256440 |
| H  | 2.0647280  | 3.3571170  | -0.2409770 |
| H  | -2.0707100 | 3.3609660  | -0.2602000 |
| H  | 2.1621110  | 5.8446380  | -0.4027290 |
| H  | -2.1621990 | 5.8483340  | -0.4228850 |
| H  | 0.0014600  | 7.1413640  | -0.4964530 |
| C  | 0.6789220  | -2.9596790 | 0.2691620  |
| C  | -0.6767450 | -2.9613280 | 0.2678650  |
| N  | 1.0702940  | -1.6383170 | 0.1377030  |
| N  | -1.0708870 | -1.6409460 | 0.1350880  |
| C  | -0.0013480 | -0.7890450 | 0.0531230  |
| C  | 2.4368530  | -1.2190860 | 0.0996300  |
| C  | -2.4377660 | -1.2246730 | 0.0841780  |
| C  | -3.0882440 | -0.8744280 | 1.2824340  |
| C  | -4.4296670 | -0.4851650 | 1.2042980  |
| C  | -5.0973010 | -0.4475800 | -0.0156090 |
| C  | -4.4332870 | -0.8039070 | -1.1851020 |
| C  | -3.0926530 | -1.2026210 | -1.1615840 |
| C  | -2.3834230 | -1.5603020 | -2.4552060 |
| C  | -2.3819900 | -0.8962170 | 2.6251710  |
| C  | 3.0904970  | -0.9227010 | 1.3105840  |
| C  | 4.4318290  | -0.5306810 | 1.2474340  |
| C  | 5.0970990  | -0.4395630 | 0.0290410  |

|   |            |            |            |
|---|------------|------------|------------|
| C | 4.4304730  | -0.7442310 | -1.1534740 |
| C | 3.0898050  | -1.1434270 | -1.1450000 |
| C | 2.3812720  | -1.4503980 | -2.4517180 |
| C | 2.3840290  | -0.9953260 | 2.6513990  |
| H | -4.9602030 | -0.2027220 | 2.1174700  |
| H | -4.9663120 | -0.7683580 | -2.1385200 |
| H | -1.3919590 | -1.9577860 | -2.1908870 |
| C | -3.1188870 | -2.6517670 | -3.2334460 |
| C | -2.1529970 | -0.3120820 | -3.3096390 |
| H | -1.3546610 | -1.2503050 | 2.4530020  |
| H | 4.9637730  | -0.2881880 | 2.1711900  |
| H | 4.9616770  | -0.6682300 | -2.1056150 |
| H | 1.3802670  | -1.8338620 | -2.2031940 |
| C | 2.1823940  | -0.1757970 | -3.2740590 |
| C | 3.1006700  | -2.5360510 | -3.2530820 |
| H | 1.3630410  | -1.3623050 | 2.4688490  |
| H | -1.3907530 | -3.7765140 | 0.3466940  |
| H | 1.3947860  | -3.7730760 | 0.3496480  |
| H | -6.1450120 | -0.1385050 | -0.0552770 |
| H | 6.1447840  | -0.1291500 | 0.0008700  |
| C | -3.0482830 | -1.8703690 | 3.5981660  |
| C | -2.2751350 | 0.5110350  | 3.2144650  |
| C | 3.0647140  | -1.9829790 | 3.6001170  |
| C | 2.2524740  | 0.3945410  | 3.2762270  |
| H | -2.5409510 | -2.9409150 | -4.1252730 |
| H | -3.2699270 | -3.5533430 | -2.6198420 |
| H | -4.1078970 | -2.3124570 | -3.5805500 |
| H | -1.6016220 | -0.5682980 | -4.2285520 |
| H | -3.1081970 | 0.1501950  | -3.6074710 |
| H | -1.5656290 | 0.4346440  | -2.7513420 |
| H | 1.6268050  | -0.3952470 | -4.1998620 |
| H | 1.6107310  | 0.5685270  | -2.6963890 |
| H | 3.1483480  | 0.2720960  | -3.5589630 |
| H | 2.5284550  | -2.7846490 | -4.1607370 |
| H | 4.1024050  | -2.2103750 | -3.5760470 |
| H | 3.2217400  | -3.4588260 | -2.6648320 |
| H | -2.4844250 | -1.9162830 | 4.5432230  |
| H | -4.0773870 | -1.5612940 | 3.8421750  |
| H | -3.0948180 | -2.8881220 | 3.1808060  |
| H | -1.7153230 | 0.4899720  | 4.1631470  |
| H | -1.7453080 | 1.1797670  | 2.5170260  |
| H | -3.2691250 | 0.9396910  | 3.4216790  |
| H | 2.5003880  | -2.0618840 | 4.5426620  |
| H | 3.1281430  | -2.9889030 | 3.1570850  |
| H | 4.0882450  | -1.6639170 | 3.8541810  |
| H | 1.6889130  | 0.3412910  | 4.2214430  |
| H | 3.2390040  | 0.8330170  | 3.4982040  |
| H | 1.7163720  | 1.0723450  | 2.5929340  |

Coordinates of the optimized structure of **PhS-IPr**

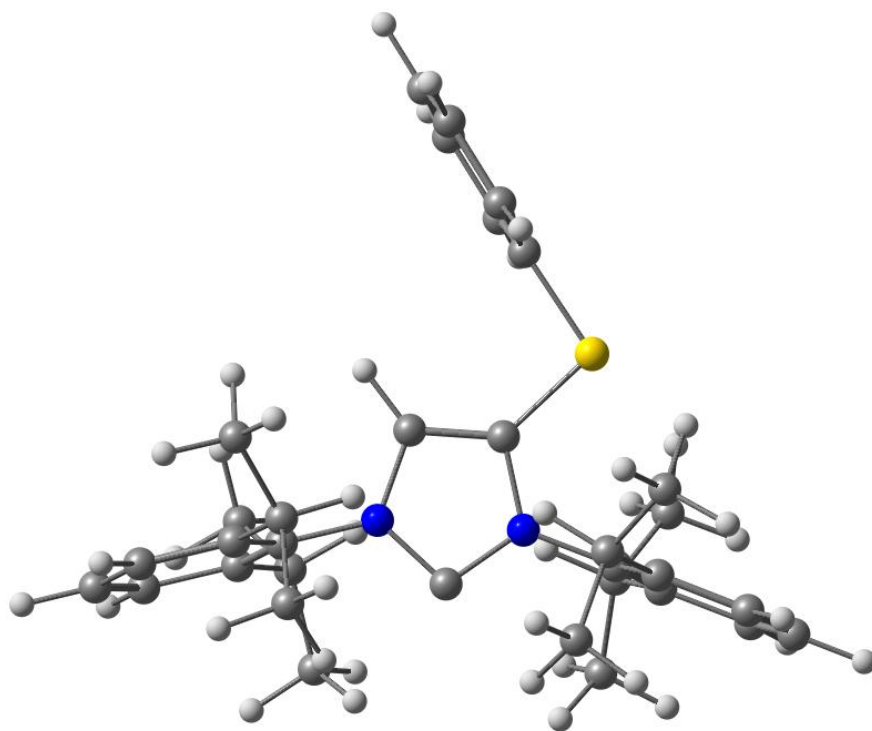

76

**PhS-IPr** E=-1787.95593137

|   |            |            |            |
|---|------------|------------|------------|
| C | 0.9909110  | -3.0550810 | 0.4227130  |
| C | -0.3621840 | -3.2022100 | 0.4399300  |
| N | 1.2287080  | -1.6958650 | 0.2509540  |
| N | -0.8795880 | -1.9212920 | 0.2762690  |
| C | 0.0773010  | -0.9647370 | 0.1547910  |
| C | 2.5416500  | -1.1310890 | 0.1814410  |
| C | -2.2833800 | -1.6502490 | 0.2257030  |
| C | -2.9522660 | -1.2999100 | 1.4141260  |
| C | -4.3235050 | -1.0350140 | 1.3354570  |
| C | -5.0041840 | -1.1255490 | 0.1250620  |
| C | -4.3230690 | -1.4832440 | -1.0334410 |
| C | -2.9503010 | -1.7540950 | -1.0086360 |
| C | -2.2236660 | -2.1137370 | -2.2917840 |
| C | -2.2155600 | -1.1610950 | 2.7336180  |
| C | 3.1678040  | -0.7152980 | 1.3714480  |
| C | 4.4509590  | -0.1664840 | 1.2740780  |
| C | 5.0853330  | -0.0387020 | 0.0429900  |
| C | 4.4474340  | -0.4612290 | -1.1191710 |
| C | 3.1658660  | -1.0193700 | -1.0757840 |
| C | 2.4699360  | -1.4431990 | -2.3556210 |
| C | 2.4917130  | -0.8306000 | 2.7248500  |
| H | -4.8692400 | -0.7507970 | 2.2383070  |
| H | -4.8674370 | -1.5494650 | -1.9790690 |
| H | -1.1868900 | -2.3675490 | -2.0255820 |
| C | -2.8331170 | -3.3401210 | -2.9715520 |
| C | -2.1669080 | -0.9130570 | -3.2385200 |
| H | -1.2433050 | -1.6649830 | 2.6209010  |
| H | 4.9612930  | 0.1702040  | 2.1800820  |
| H | 4.9546880  | -0.3534630 | -2.0809590 |
| H | 1.5805720  | -2.0246720 | -2.0697370 |

|   |            |            |            |
|---|------------|------------|------------|
| C | 1.9766010  | -0.2162650 | -3.1264280 |
| C | 3.3430470  | -2.3471670 | -3.2248020 |
| H | 1.5143420  | -1.3100390 | 2.5662400  |
| H | -0.9819160 | -4.0868230 | 0.5514560  |
| H | -6.0758960 | -0.9146480 | 0.0851310  |
| H | 6.0870920  | 0.3949850  | -0.0118670 |
| C | -2.9446820 | -1.8362810 | 3.8942810  |
| C | -1.9298200 | 0.3132190  | 3.0307190  |
| C | 3.2885820  | -1.7188050 | 3.6817320  |
| C | 2.2233700  | 0.5505480  | 3.3256920  |
| H | -2.2496510 | -3.6134860 | -3.8647690 |
| H | -2.8463640 | -4.2090810 | -2.2958200 |
| H | -3.8682210 | -3.1538180 | -3.2994210 |
| H | -1.5918250 | -1.1606750 | -4.1449400 |
| H | -3.1760370 | -0.6041460 | -3.5557100 |
| H | -1.6853590 | -0.0511480 | -2.7530200 |
| H | 1.4251580  | -0.5212090 | -4.0301810 |
| H | 1.3047060  | 0.3928910  | -2.5035020 |
| H | 2.8189610  | 0.4197590  | -3.4436540 |
| H | 2.7761450  | -2.6931860 | -4.1032030 |
| H | 4.2361700  | -1.8223980 | -3.5992510 |
| H | 3.6794310  | -3.2331510 | -2.6650680 |
| H | -2.3268550 | -1.7955860 | 4.8048450  |
| H | -3.8990770 | -1.3389490 | 4.1290010  |
| H | -3.1598840 | -2.8937870 | 3.6770220  |
| H | -1.3545260 | 0.4173170  | 3.9646520  |
| H | -1.3484300 | 0.7690900  | 2.2157700  |
| H | -2.8670750 | 0.8818530  | 3.1450640  |
| H | 2.7505510  | -1.8345770 | 4.6359010  |
| H | 3.4460920  | -2.7204500 | 3.2536030  |
| H | 4.2764060  | -1.2873430 | 3.9101020  |
| H | 1.6787020  | 0.4571550  | 4.2786270  |
| H | 3.1614580  | 1.0915080  | 3.5299410  |
| H | 1.6174350  | 1.1672340  | 2.6451290  |
| S | 2.3208340  | -4.1958550 | 0.5599770  |
| C | 1.3976370  | -5.7117010 | 0.7395820  |
| C | 1.0321730  | -6.1582100 | 2.0133830  |
| C | 1.0873570  | -6.4730050 | -0.3914520 |
| C | 0.3436110  | -7.3626880 | 2.1509040  |
| C | 0.3996650  | -7.6771770 | -0.2458290 |
| C | 0.0271530  | -8.1212500 | 1.0232950  |
| H | 1.2888930  | -5.5596740 | 2.8903250  |
| H | 1.3866080  | -6.1180760 | -1.3801940 |
| H | 0.0572340  | -7.7121920 | 3.1457450  |
| H | 0.1572280  | -8.2725950 | -1.1293170 |
| H | -0.5097420 | -9.0663700 | 1.1348890  |

Coordinates of the optimized structure of **9b**

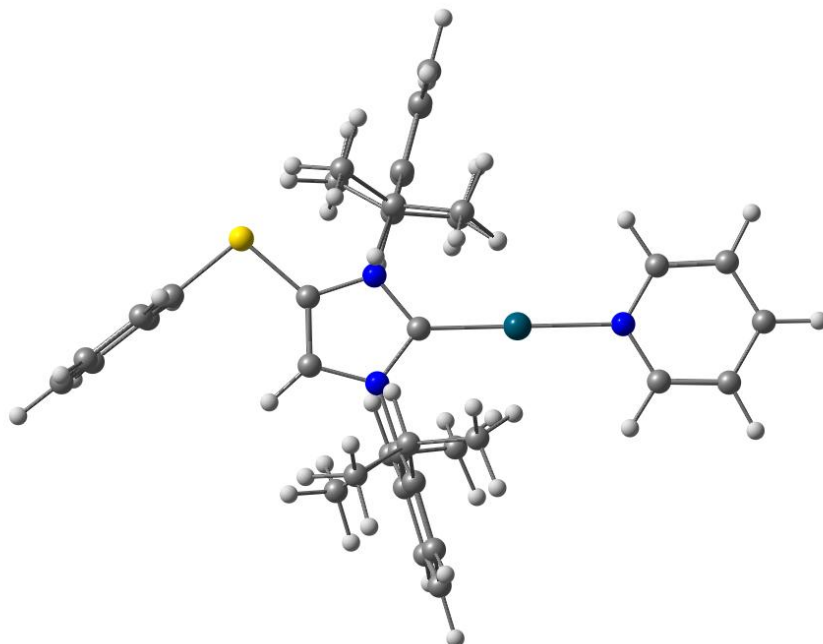

88

**9b** E=-2164.01204195

|    |            |            |            |
|----|------------|------------|------------|
| Pd | 0.0372910  | 1.0433840  | -0.0847800 |
| N  | -0.1127380 | 3.1252500  | -0.3239870 |
| C  | 0.9838230  | 3.8939280  | -0.4251700 |
| C  | -1.3123160 | 3.7256690  | -0.3910370 |
| C  | 0.9255560  | 5.2731530  | -0.5962920 |
| C  | -1.4606600 | 5.0982030  | -0.5606130 |
| C  | -0.3205730 | 5.8915690  | -0.6660550 |
| H  | 1.9418720  | 3.3731090  | -0.3656900 |
| H  | -2.1820180 | 3.0705370  | -0.3051880 |
| H  | 1.8508280  | 5.8471400  | -0.6731260 |
| H  | -2.4614980 | 5.5312390  | -0.6084910 |
| H  | -0.4018140 | 6.9729190  | -0.8001900 |
| C  | 0.9963060  | -3.0177090 | 0.4019470  |
| C  | -0.3608750 | -3.1109730 | 0.3993750  |
| N  | 1.3012230  | -1.6737190 | 0.2389970  |
| N  | -0.8364780 | -1.8169210 | 0.2389030  |
| C  | 0.1696800  | -0.9002710 | 0.1358810  |
| C  | 2.6388160  | -1.1710150 | 0.1766150  |
| C  | -2.2307540 | -1.5036810 | 0.1927430  |
| C  | -2.9161940 | -1.2818510 | 1.4019980  |
| C  | -4.2868960 | -1.0106800 | 1.3336920  |
| C  | -4.9499880 | -0.9656920 | 0.1114710  |
| C  | -4.2503150 | -1.1917520 | -1.0695280 |
| C  | -2.8788920 | -1.4669490 | -1.0559200 |
| C  | -2.1395810 | -1.6996780 | -2.3598260 |
| C  | -2.2113520 | -1.2980940 | 2.7459110  |
| C  | 3.2698330  | -0.7674570 | 1.3687220  |
| C  | 4.5826110  | -0.2936530 | 1.2800610  |
| C  | 5.2415810  | -0.2279170 | 0.0565910  |
| C  | 4.5982740  | -0.6394260 | -1.1061970 |
| C  | 3.2860450  | -1.1221920 | -1.0728400 |
| C  | 2.5989080  | -1.5434150 | -2.3585130 |
| C  | 2.5703690  | -0.8205860 | 2.7135100  |

|   |            |            |            |
|---|------------|------------|------------|
| H | -4.8445030 | -0.8282080 | 2.2559600  |
| H | -4.7798870 | -1.1519820 | -2.0249460 |
| H | -1.0860420 | -1.8952170 | -2.1112620 |
| C | -2.6743350 | -2.9257710 | -3.1016740 |
| C | -2.1660620 | -0.4476860 | -3.2373950 |
| H | -1.1670560 | -1.5954450 | 2.5686850  |
| H | 5.0975060  | 0.0325080  | 2.1874100  |
| H | 5.1247130  | -0.5826160 | -2.0622060 |
| H | 1.6212120  | -1.9696350 | -2.0878450 |
| C | 2.3267980  | -0.3308730 | -3.2510920 |
| C | 3.3806970  | -2.6308590 | -3.0965350 |
| H | 1.5680600  | -1.2432240 | 2.5475030  |
| H | -1.0154380 | -3.9709800 | 0.4987610  |
| H | -6.0215120 | -0.7522230 | 0.0791240  |
| H | 6.2674260  | 0.1464580  | 0.0090670  |
| C | -2.8227260 | -2.3236200 | 3.7012660  |
| C | -2.1794380 | 0.1026660  | 3.3602170  |
| C | 3.3019470  | -1.7381600 | 3.6946360  |
| C | 2.3727790  | 0.5842550  | 3.2846710  |
| H | -2.0908360 | -3.1057950 | -4.0184160 |
| H | -2.6143180 | -3.8311430 | -2.4780460 |
| H | -3.7267700 | -2.7932260 | -3.4001910 |
| H | -1.5739980 | -0.6061870 | -4.1527940 |
| H | -3.1924160 | -0.1877690 | -3.5433970 |
| H | -1.7367180 | 0.4095080  | -2.6944980 |
| H | 1.7869710  | -0.6355730 | -4.1619790 |
| H | 1.7112620  | 0.4109460  | -2.7171750 |
| H | 3.2647960  | 0.1564020  | -3.5632780 |
| H | 2.8249940  | -2.9621950 | -3.9879060 |
| H | 4.3635020  | -2.2685740 | -3.4381960 |
| H | 3.5468030  | -3.5074160 | -2.4519760 |
| H | -2.2549210 | -2.3552200 | 4.6444970  |
| H | -3.8661710 | -2.0755820 | 3.9534850  |
| H | -2.8140700 | -3.3348330 | 3.2658250  |
| H | -1.6212340 | 0.0953980  | 4.3100830  |
| H | -1.6862900 | 0.8122750  | 2.6769990  |
| H | -3.1956710 | 0.4736810  | 3.5705890  |
| H | 2.7429340  | -1.8119960 | 4.6409410  |
| H | 3.4135230  | -2.7525210 | 3.2818750  |
| H | 4.3078130  | -1.3574180 | 3.9345950  |
| H | 1.8140550  | 0.5396410  | 4.2331390  |
| H | 3.3370160  | 1.0782560  | 3.4871510  |
| H | 1.8026880  | 1.2092370  | 2.5786790  |
| S | 2.2701140  | -4.2167230 | 0.5656860  |
| C | 1.2685140  | -5.6638540 | 0.8578010  |
| C | 0.8942580  | -5.9985530 | 2.1631700  |
| C | 0.9017990  | -6.4829440 | -0.2141490 |
| C | 0.1399400  | -7.1482900 | 2.3912880  |
| C | 0.1486840  | -7.6327220 | 0.0222900  |
| C | -0.2329440 | -7.9644920 | 1.3224190  |
| H | 1.1960070  | -5.3565940 | 2.9938510  |
| H | 1.2076810  | -6.2157810 | -1.2281300 |
| H | -0.1535170 | -7.4099950 | 3.4107220  |
| H | -0.1386830 | -8.2733710 | -0.8148490 |
| H | -0.8216140 | -8.8668470 | 1.5046540  |

Coordinates of the optimized structure of **PhSO<sub>2</sub>-IPr**

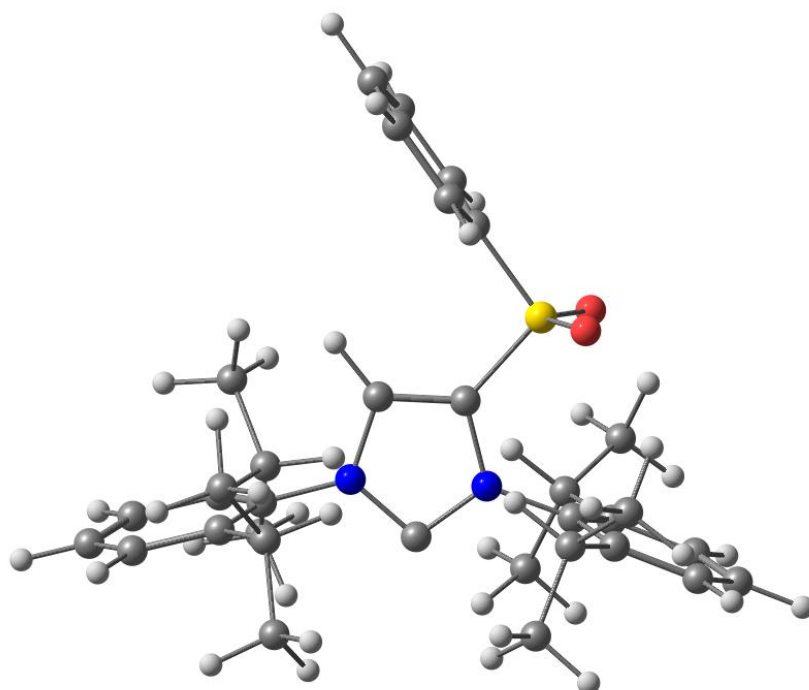

78

**PhSO<sub>2</sub>-IPr** E=-1938.29326321

|   |            |            |            |
|---|------------|------------|------------|
| C | 1.2973410  | -2.9786550 | 0.3418320  |
| C | -0.0430020 | -3.2033650 | 0.3994500  |
| N | 1.4637750  | -1.6139170 | 0.1365000  |
| N | -0.6325040 | -1.9699310 | 0.2290110  |
| C | 0.2731940  | -0.9593220 | 0.0628420  |
| C | 2.7368270  | -0.9564980 | 0.0323530  |
| C | -2.0523630 | -1.7743690 | 0.2475240  |
| C | -2.6909380 | -1.5793760 | 1.4862300  |
| C | -4.0804750 | -1.4168350 | 1.4808980  |
| C | -4.8018080 | -1.4403920 | 0.2918850  |
| C | -4.1442940 | -1.6258570 | -0.9197630 |
| C | -2.7570880 | -1.8002430 | -0.9698740 |
| C | -2.0613600 | -1.9764680 | -2.3066930 |
| C | -1.9277330 | -1.5391890 | 2.7981240  |
| C | 3.3370550  | -0.4671940 | 1.2065830  |
| C | 4.5617790  | 0.1944020  | 1.0772050  |
| C | 5.1627710  | 0.3534540  | -0.1675380 |
| C | 4.5504450  | -0.1484540 | -1.3108450 |
| C | 3.3240060  | -0.8170770 | -1.2373360 |
| C | 2.6396150  | -1.3121170 | -2.4977230 |
| C | 2.6654920  | -0.5955830 | 2.5609330  |
| H | -4.6066660 | -1.2647380 | 2.4265480  |
| H | -4.7198020 | -1.6341050 | -1.8487600 |
| H | -1.0020220 | -2.1953730 | -2.1062240 |
| C | -2.6278300 | -3.1543800 | -3.1003040 |
| C | -2.1071730 | -0.6774990 | -3.1145460 |
| H | -0.8552020 | -1.6076950 | 2.5630750  |
| H | 5.0544010  | 0.5921640  | 1.9669420  |
| H | 5.0335370  | -0.0176990 | -2.2816920 |
| H | 1.8691390  | -2.0361030 | -2.1917860 |
| C | 1.9309610  | -0.1518230 | -3.2019180 |
| C | 3.5908760  | -2.0481260 | -3.4387120 |



|   |            |            |            |
|---|------------|------------|------------|
| H | 1.9253820  | -1.4069100 | 2.4842250  |
| H | -0.6053730 | -4.1216840 | 0.5454250  |
| H | -5.8866030 | -1.3089370 | 0.3092670  |
| H | 6.1210310  | 0.8731570  | -0.2467540 |
| C | -2.2816180 | -2.7343860 | 3.6855980  |
| C | -2.1391190 | -0.2133650 | 3.5306610  |
| C | 3.6361940  | -0.9879720 | 3.6719790  |
| C | 1.9060410  | 0.6909100  | 2.8963700  |
| H | -2.0592040 | -3.2954940 | -4.0326430 |
| H | -2.5742340 | -4.0913440 | -2.5248360 |
| H | -3.6808590 | -2.9913280 | -3.3795380 |
| H | -1.5553430 | -0.7908990 | -4.0609900 |
| H | -3.1436740 | -0.3963380 | -3.3613390 |
| H | -1.6544900 | 0.1524350  | -2.5517720 |
| H | 1.3891290  | -0.5099180 | -4.0919840 |
| H | 1.2081290  | 0.3357610  | -2.5307020 |
| H | 2.6570560  | 0.6088490  | -3.5317750 |
| H | 3.0304280  | -2.4630840 | -4.2911280 |
| H | 4.3623410  | -1.3804260 | -3.8539920 |
| H | 4.0894230  | -2.8781770 | -2.9181400 |
| H | -1.6904290 | -2.7140180 | 4.6146250  |
| H | -3.3466430 | -2.7244360 | 3.9678870  |
| H | -2.0797430 | -3.6892140 | 3.1760190  |
| H | -1.5215990 | -0.1771570 | 4.4417970  |
| H | -1.8592640 | 0.6402980  | 2.8955800  |
| H | -3.1887490 | -0.0791370 | 3.8368310  |
| H | 3.0846170  | -1.1608860 | 4.6093930  |
| H | 4.1722170  | -1.9122160 | 3.4125420  |
| H | 4.3768470  | -0.1984340 | 3.8755480  |
| H | 1.3735930  | 0.5897850  | 3.8558060  |
| H | 2.5976550  | 1.5448210  | 2.9814520  |
| H | 1.1678110  | 0.9251090  | 2.1147090  |
| S | 2.6314020  | -4.1303860 | 0.4891270  |
| O | 3.2949700  | -4.2357790 | -0.8108090 |
| O | 3.4167100  | -3.7705260 | 1.6701490  |
| C | 1.7828700  | -5.6564400 | 0.8173530  |
| C | 1.5064110  | -6.0027470 | 2.1401470  |
| C | 1.4373130  | -6.4807430 | -0.2532230 |
| C | 0.8472470  | -7.2038270 | 2.3909690  |
| C | 0.7786820  | -7.6790970 | 0.0137190  |
| C | 0.4826810  | -8.0358370 | 1.3305020  |
| H | 1.8152400  | -5.3424890 | 2.9529670  |
| H | 1.6930590  | -6.1848150 | -1.2725350 |
| H | 0.6231540  | -7.4952070 | 3.4194810  |
| H | 0.5009410  | -8.3404800 | -0.8098950 |
| H | -0.0326270 | -8.9776150 | 1.5336070  |

Coordinates of the optimized structure of **9c**

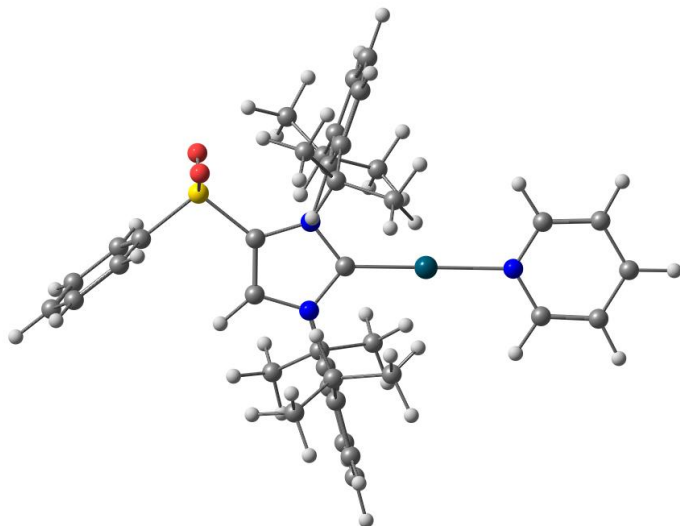

90

**9c** E=-2314.3487229

|    |            |            |            |
|----|------------|------------|------------|
| Pd | 0.0712120  | 1.0049840  | -0.0648800 |
| N  | -0.2483670 | 3.0735320  | -0.3043150 |
| C  | 0.7886380  | 3.9112520  | -0.4650010 |
| C  | -1.4871910 | 3.5908870  | -0.3214950 |
| C  | 0.6300900  | 5.2808330  | -0.6487020 |
| C  | -1.7352220 | 4.9479930  | -0.4992400 |
| C  | -0.6568170 | 5.8134280  | -0.6671320 |
| H  | 1.7813910  | 3.4562450  | -0.4452120 |
| H  | -2.3064350 | 2.8811320  | -0.1876620 |
| H  | 1.5100190  | 5.9141250  | -0.7752280 |
| H  | -2.7639440 | 5.3128500  | -0.5050050 |
| H  | -0.8166020 | 6.8848840  | -0.8097590 |
| C  | 1.3344630  | -2.9653560 | 0.3506230  |
| C  | -0.0116530 | -3.1547530 | 0.3850610  |
| N  | 1.5519250  | -1.6030850 | 0.1976630  |
| N  | -0.5776740 | -1.9098210 | 0.2546490  |
| C  | 0.3658690  | -0.9158390 | 0.1371280  |
| C  | 2.8438250  | -0.9800780 | 0.1242600  |
| C  | -1.9930740 | -1.6907500 | 0.2475560  |
| C  | -2.6488950 | -1.4642630 | 1.4714790  |
| C  | -4.0364530 | -1.2894990 | 1.4402270  |
| C  | -4.7401950 | -1.3395890 | 0.2414240  |
| C  | -4.0661620 | -1.5647180 | -0.9545870 |
| C  | -2.6797400 | -1.7479420 | -0.9792520 |
| C  | -1.9632290 | -1.9515120 | -2.3008540 |
| C  | -1.9042690 | -1.3789990 | 2.7912320  |
| C  | 3.4476620  | -0.5377380 | 1.3165580  |
| C  | 4.6930710  | 0.0892840  | 1.2150250  |
| C  | 5.3135700  | 0.2602180  | -0.0180910 |
| C  | 4.6995110  | -0.1975520 | -1.1786930 |
| C  | 3.4521740  | -0.8289980 | -1.1359260 |
| C  | 2.7800040  | -1.2699450 | -2.4232470 |
| C  | 2.7790730  | -0.6820880 | 2.6715930  |
| H  | -4.5749720 | -1.1078940 | 2.3737220  |
| H  | -4.6277340 | -1.5959170 | -1.8916230 |
| H  | -0.9113180 | -2.1859090 | -2.0787770 |
| C  | -2.5336230 | -3.1260280 | -3.0959280 |

|   |            |            |            |
|---|------------|------------|------------|
| C | -1.9686840 | -0.6549590 | -3.1134450 |
| H | -0.8406620 | -1.5741280 | 2.5882440  |
| H | 5.1862770  | 0.4505070  | 2.1203030  |
| H | 5.1970720  | -0.0593270 | -2.1413980 |
| H | 1.9394920  | -1.9258230 | -2.1494220 |
| C | 2.1986640  | -0.0600880 | -3.1593940 |
| C | 3.7094690  | -2.0832020 | -3.3227360 |
| H | 1.9390220  | -1.3836660 | 2.5527190  |
| H | -0.5980730 | -4.0628210 | 0.4914100  |
| H | -5.8242660 | -1.2005140 | 0.2388810  |
| H | 6.2880400  | 0.7521860  | -0.0745930 |
| C | -2.3832110 | -2.4383080 | 3.7850390  |
| C | -1.9937030 | 0.0314390  | 3.3768500  |
| C | 3.7150860  | -1.2758290 | 3.7239920  |
| C | 2.1964200  | 0.6578890  | 3.1281930  |
| H | -1.9503650 | -3.2824560 | -4.0167390 |
| H | -2.5057150 | -4.0600350 | -2.5135040 |
| H | -3.5785490 | -2.9487320 | -3.3962350 |
| H | -1.3978900 | -0.7805370 | -4.0473020 |
| H | -2.9947930 | -0.3551890 | -3.3818240 |
| H | -1.5078270 | 0.1604650  | -2.5317540 |
| H | 1.6564550  | -0.3808540 | -4.0636010 |
| H | 1.4987380  | 0.4923210  | -2.5096060 |
| H | 2.9978980  | 0.6315540  | -3.4728140 |
| H | 3.1573640  | -2.4454040 | -4.2043840 |
| H | 4.5527930  | -1.4799580 | -3.6948400 |
| H | 4.1094460  | -2.9539180 | -2.7847640 |
| H | -1.7920040 | -2.3885330 | 4.7128760  |
| H | -3.4402130 | -2.2912820 | 4.0590820  |
| H | -2.2824430 | -3.4540780 | 3.3721720  |
| H | -1.4036070 | 0.1013680  | 4.3043900  |
| H | -1.5998560 | 0.7712590  | 2.6617500  |
| H | -3.0338780 | 0.3024690  | 3.6194970  |
| H | 3.1666630  | -1.4432930 | 4.6645290  |
| H | 4.1240630  | -2.2380090 | 3.3853500  |
| H | 4.5539010  | -0.6001830 | 3.9550050  |
| H | 1.6691940  | 0.5426780  | 4.0891420  |
| H | 2.9931210  | 1.4069300  | 3.2683190  |
| H | 1.4814870  | 1.0468810  | 2.3827090  |
| S | 2.6154360  | -4.1809300 | 0.4513340  |
| O | 3.2566090  | -4.2932780 | -0.8590560 |
| O | 3.4358430  | -3.8941720 | 1.6278780  |
| C | 1.6910170  | -5.6674640 | 0.7548100  |
| C | 1.4085430  | -6.0284930 | 2.0723710  |
| C | 1.2937180  | -6.4481860 | -0.3302880 |
| C | 0.6907570  | -7.1994910 | 2.3032310  |
| C | 0.5768390  | -7.6171190 | -0.0832310 |
| C | 0.2748680  | -7.9877970 | 1.2282980  |
| H | 1.7568280  | -5.4021550 | 2.8960140  |
| H | 1.5545750  | -6.1417650 | -1.3451950 |
| H | 0.4604530  | -7.5018090 | 3.3272060  |
| H | 0.2575730  | -8.2444760 | -0.9183390 |
| H | -0.2864080 | -8.9062530 | 1.4158120  |

## S6. Literature references

1. Perdew, J. P.; Burke, K.; Ernzerhof, M., Generalized Gradient Approximation Made Simple. *Phys. Rev. Lett.* **1996**, *77* (18), 3865-3868.
2. Adamo, C.; Barone, V., Toward reliable density functional methods without adjustable parameters: The PBE0 model. *J. Chem. Phys.* **1999**, *110* (13), 6158-6170.
3. Weigend, F.; Ahlrichs, R., Balanced basis sets of split valence, triple zeta valence and quadruple zeta valence quality for H to Rn: Design and assessment of accuracy. *Phys. Chem. Chem. Phys.* **2005**, *7* (18), 3297-3305.
4. Frisch, M. J.; Trucks, G. W.; Schlegel, H. B.; Scuseria, G. E.; Robb, M. A.; Cheeseman, J. R.; Scalmani, G.; Barone, V.; Mennucci, B.; Petersson, G. A.; Nakatsuji, H.; Caricato, M.; Li, X.; Hratchian, H. P.; Izmaylov, A. F.; Bloino, J.; Zheng, G.; Sonnenberg, J. L.; Hada, M.; Ehara, M.; Toyota, K.; Fukuda, R.; Hasegawa, J.; Ishida, M.; Nakajima, T.; Honda, Y.; Kitao, O.; Nakai, H.; Vreven, T.; Montgomery Jr., J. A.; Peralta, J. E.; Ogliaro, F.; Bearpark, M. J.; Heyd, J.; Brothers, E. N.; Kudin, K. N.; Staroverov, V. N.; Kobayashi, R.; Normand, J.; Raghavachari, K.; Rendell, A. P.; Burant, J. C.; Iyengar, S. S.; Tomasi, J.; Cossi, M.; Rega, N.; Millam, N. J.; Klene, M.; Knox, J. E.; Cross, J. B.; Bakken, V.; Adamo, C.; Jaramillo, J.; Gomperts, R.; Stratmann, R. E.; Yazyev, O.; Austin, A. J.; Cammi, R.; Pomelli, C.; Ochterski, J. W.; Martin, R. L.; Morokuma, K.; Zakrzewski, V. G.; Voth, G. A.; Salvador, P.; Dannenberg, J. J.; Dapprich, S.; Daniels, A. D.; Farkas, Ö.; Foresman, J. B.; Ortiz, J. V.; Cioslowski, J.; Fox, D. J. *Gaussian 09, Revision D.01*, Gaussian, Inc.: Wallingford, CT, USA, 2009.
5. Schäfer, A.; Huber, C.; Ahlrichs, R., Fully optimized contracted Gaussian basis sets of triple zeta valence quality for atoms Li to Kr. *The Journal of Chemical Physics* **1994**, *100* (8), 5829-5835.
6. Tomasi, J.; Mennucci, B.; Cammi, R., Quantum Mechanical Continuum Solvation Models. *Chemical Reviews* **2005**, *105* (8), 2999-3094.
7. Klamt, A.; Moya, C.; Palomar, J., A Comprehensive Comparison of the IEFPCM and SS(V)PE Continuum Solvation Methods with the COSMO Approach. *J. Chem. Theory Comput.* **2015**, *11* (9), 4220-4225.
8. Falivene, L.; Cao, Z.; Petta, A.; Serra, L.; Poater, A.; Oliva, R.; Scarano, V.; Cavallo, L., Towards the online computer-aided design of catalytic pockets. *Nature Chemistry* **2019**, *11* (10), 872-879.
9. Lu, T.; Chen, F., Multiwfn: A multifunctional wavefunction analyzer. *Journal of Computational Chemistry* **2012**, *33* (5), 580-592.
10. Zhurko, G. A. *Chemcraft - graphical program for visualization of quantum chemistry computations*, Version 1.8 (buid 622b); Zhurko, G. A.; Ivanovo, Russia, 2005.
11. Pasyukov, D. V.; Shevchenko, M. A.; Shepelenko, K. E.; Khazipov, O. V.; Burykina, J. V.; Gordeev, E. G.; Minyaev, M. E.; Chernyshev, V. M.; Ananikov, V. P., One-Step Access to Heteroatom-Functionalized Imidazol(in)ium Salts. *Angewandte Chemie International Edition* **2022**, *61* (9), e202116131.
12. CrysAlisPro. Version 1.171.42. *Rigaku Oxford Diffraction* **2022**.
13. Sheldrick, G., SHELXT - Integrated space-group and crystal-structure determination. *Acta Crystallographica Section A* **2015**, *71* (1), 3-8.
14. Sheldrick, G., Crystal structure refinement with SHELXL. *Acta Crystallographica Section C* **2015**, *71* (1), 3-8.
15. Dolomanov, O. V.; Bourhis, L. J.; Gildea, R. J.; Howard, J. A. K.; Puschmann, H., OLEX2: a complete structure solution, refinement and analysis program. *Journal of Applied Crystallography* **2009**, *42* (2), 339-341.
